# Supplementary material for: Activity-Induced Cortical Glutamatergic Neuron Nascent Proteins
Source: J Neurosci. 2022 Oct 19;42(42):7900–20. doi: 10.1523/JNEUROSCI.0707-22.2022 (PMC9617616; doi:10.1523/JNEUROSCI.0707-22.2022)
Supplement: Figure 8-2 — Data for Figure 8A. IPA annotation of dataset by subcellular location and protein type. The table lists Protein Symbol, Entrez Gene Name, Subcellular location, and Protein type NSPs changed >2× compared to control. Our raw data include multiple unique peptides that could be part of the same protein. For this analysis, only unique proteins were included. Download Figure 8-2, XLSX file. [file ns-JN-RM-0707-22-s12.xlsx]

## Sheet: Fig 8A 2X_Changed NSPs
Symbol	Entrez Gene Name	Location	Type(s)
2810408A11Rik		Other	other
Gm10320		Other	other
DECR1	2,4-dienoyl-CoA reductase 1	Cytoplasm	enzyme
PAPSS1	3'-phosphoadenosine 5'-phosphosulfate synthase 1	Cytoplasm	enzyme
ABHD16A	abhydrolase domain containing 16A, phospholipase	Other	enzyme
ABHD4	abhydrolase domain containing 4, N-acyl phospholipase B	Cytoplasm	peptidase
ADI1	acireductone dioxygenase 1	Nucleus	enzyme
ACTBL2	actin beta like 2	Nucleus	other
ACTR1B	actin related protein 1B	Cytoplasm	other
ACTR3B	actin related protein 3B	Cytoplasm	other
ACTN2	actinin alpha 2	Nucleus	transcription regulator
ACBD3	acyl-CoA binding domain containing 3	Cytoplasm	other
ACBD5	acyl-CoA binding domain containing 5	Nucleus	other
ACSL1	acyl-CoA synthetase long chain family member 1	Cytoplasm	enzyme
ACSS1	acyl-CoA synthetase short chain family member 1	Cytoplasm	enzyme
ACSS2	acyl-CoA synthetase short chain family member 2	Cytoplasm	enzyme
ACYP1	acylphosphatase 1	Cytoplasm	enzyme
ACYP2	acylphosphatase 2	Cytoplasm	enzyme
AP1G1	adaptor related protein complex 1 subunit gamma 1	Cytoplasm	other
AP2S1	adaptor related protein complex 2 subunit sigma 1	Cytoplasm	transporter
ADD1	adducin 1	Cytoplasm	other
ADAR	adenosine deaminase RNA specific	Nucleus	enzyme
AMPD3	adenosine monophosphate deaminase 3	Cytoplasm	enzyme
AK2	adenylate kinase 2	Cytoplasm	kinase
ADGRB1	adhesion G protein-coupled receptor B1	Plasma Membrane	G-protein coupled receptor
ADGRL2	adhesion G protein-coupled receptor L2	Plasma Membrane	G-protein coupled receptor
ADGRL3	adhesion G protein-coupled receptor L3	Plasma Membrane	G-protein coupled receptor
ADRM1	adhesion regulating molecule 1	Plasma Membrane	other
Gm9774	adhesion regulating molecule 1 pseudogene	Other	other
ARF4	ADP ribosylation factor 4	Cytoplasm	enzyme
ARF6	ADP ribosylation factor 6	Plasma Membrane	transporter
ARFGAP2	ADP ribosylation factor GTPase activating protein 2	Nucleus	other
ARFIP1	ADP ribosylation factor interacting protein 1	Cytoplasm	other
ARL1	ADP ribosylation factor like GTPase 1	Cytoplasm	enzyme
ARL6IP5	ADP ribosylation factor like GTPase 6 interacting protein 5	Cytoplasm	other
ADPRH	ADP-ribosylarginine hydrolase	Other	enzyme
AHNAK	AHNAK nucleoprotein	Nucleus	other
AKAP12	A-kinase anchoring protein 12	Cytoplasm	transporter
ADHFE1	alcohol dehydrogenase iron containing 1	Cytoplasm	enzyme
ALDH2	aldehyde dehydrogenase 2 family member	Cytoplasm	enzyme
AKR1A1	aldo-keto reductase family 1 member A1	Cytoplasm	enzyme
AKR1B1	aldo-keto reductase family 1 member B	Cytoplasm	enzyme
ALG2	ALG2 alpha-1,3/1,6-mannosyltransferase	Cytoplasm	enzyme
AMT	aminomethyltransferase	Cytoplasm	enzyme
NPEPPS	aminopeptidase puromycin sensitive	Cytoplasm	peptidase
AGL	amylo-alpha-1, 6-glucosidase, 4-alpha-glucanotransferase	Cytoplasm	enzyme
APLP2	amyloid beta precursor like protein 2	Cytoplasm	other
APBB1	amyloid beta precursor protein binding family B member 1	Cytoplasm	transcription regulator
AMOT	angiomotin	Plasma Membrane	other
AMOTL1	angiomotin like 1	Plasma Membrane	other
AGT	angiotensinogen	Extracellular Space	growth factor
ANK3	ankyrin 3	Plasma Membrane	other
ANKMY2	ankyrin repeat and MYND domain containing 2	Plasma Membrane	other
ANKRD17	ankyrin repeat domain 17	Nucleus	other
ANXA1	annexin A1	Plasma Membrane	enzyme
ANXA11	annexin A11	Nucleus	other
APOA2	apolipoprotein A2	Extracellular Space	transporter
APOA4	apolipoprotein A4	Extracellular Space	transporter
APOH	apolipoprotein H	Extracellular Space	transporter
API5	apoptosis inhibitor 5	Cytoplasm	other
ARCN1	archain 1	Cytoplasm	other
ACAP2	ArfGAP with coiled-coil, ankyrin repeat and PH domains 2	Nucleus	other
ARFGEF3	ARFGEF family member 3	Other	other
Rsrc2	arginine/serine-rich coiled-coil 2	Other	other
RARS1	arginyl-tRNA synthetase 1	Cytoplasm	enzyme
NARS1	asparaginyl-tRNA synthetase 1	Cytoplasm	enzyme
DNPEP	aspartyl aminopeptidase	Cytoplasm	peptidase
ASTN1	astrotactin 1	Other	other
ATXN2	ataxin 2	Nucleus	other
ATL2	atlastin GTPase 2	Cytoplasm	other
ABCF3	ATP binding cassette subfamily F member 3	Other	transporter
ATP5MF	ATP synthase membrane subunit f	Cytoplasm	transporter
ATP5MK	ATP synthase membrane subunit k	Cytoplasm	other
ATP5PD	ATP synthase peripheral stalk subunit d	Cytoplasm	enzyme
Gm10250	ATP synthase, H+ transporting, mitochondrial F0 complex, subunit d pseudogene	Other	other
ATP6AP1	ATPase H+ transporting accessory protein 1	Cytoplasm	transporter
ATP6V1G1	ATPase H+ transporting V1 subunit G1	Cytoplasm	transporter
ATP8A1	ATPase phospholipid transporting 8A1	Cytoplasm	transporter
ATP9A	ATPase phospholipid transporting 9A (putative)	Cytoplasm	transporter
ATP2A1	ATPase sarcoplasmic/endoplasmic reticulum Ca2+ transporting 1	Cytoplasm	transporter
ARID1A	AT-rich interaction domain 1A	Nucleus	transcription regulator
BAG3	BAG cochaperone 3	Cytoplasm	other
BTF3	basic transcription factor 3	Nucleus	transcription regulator
BSN	bassoon presynaptic cytomatrix protein	Plasma Membrane	other
BCAS3	BCAS3 microtubule associated cell migration factor	Nucleus	other
BCR	BCR activator of RhoGEF and GTPase	Cytoplasm	kinase
BLVRA	biliverdin reductase A	Cytoplasm	enzyme
BPHL	biphenyl hydrolase like	Cytoplasm	enzyme
BMPR2	bone morphogenetic protein receptor type 2	Plasma Membrane	kinase
BRSK1	BR serine/threonine kinase 1	Cytoplasm	kinase
BRSK2	BR serine/threonine kinase 2	Cytoplasm	kinase
BCKDK	branched chain keto acid dehydrogenase kinase	Cytoplasm	kinase
BIN1	bridging integrator 1	Nucleus	other
BTBD11	BTB domain containing 11	Other	transcription regulator
BTBD8	BTB domain containing 8	Nucleus	other
BUB3	BUB3 mitotic checkpoint protein	Nucleus	other
CDH5	cadherin 5	Plasma Membrane	other
Cabp1	calcium binding protein 1	Plasma Membrane	other
CAMK2N1	calcium/calmodulin dependent protein kinase II inhibitor 1	Plasma Membrane	kinase
CAMK4	calcium/calmodulin dependent protein kinase IV	Nucleus	kinase
CAMKK1	calcium/calmodulin dependent protein kinase kinase 1	Cytoplasm	kinase
CASK	calcium/calmodulin dependent serine protein kinase	Plasma Membrane	kinase
CLMN	calmin	Cytoplasm	other
CAPN2	calpain 2	Cytoplasm	peptidase
CAST	calpastatin	Cytoplasm	peptidase
CLSTN1	calsyntenin 1	Plasma Membrane	other
CLIP1	CAP-Gly domain containing linker protein 1	Cytoplasm	other
CHST2	carbohydrate sulfotransferase 2	Cytoplasm	enzyme
CPE	carboxypeptidase E	Cytoplasm	peptidase
CROT	carnitine O-octanoyltransferase	Cytoplasm	enzyme
CSNK1A1	casein kinase 1 alpha 1	Cytoplasm	kinase
CSNK1D	casein kinase 1 delta	Cytoplasm	kinase
CSNK1E	casein kinase 1 epsilon	Cytoplasm	kinase
CTNND1	catenin delta 1	Nucleus	other
CTSA	cathepsin A	Cytoplasm	peptidase
CAV1	caveolin 1	Plasma Membrane	transmembrane receptor
CBL	Cbl proto-oncogene	Nucleus	transcription regulator
CD151	CD151 molecule (Raph blood group)	Plasma Membrane	other
CD200	CD200 molecule	Plasma Membrane	other
CD9	CD9 molecule	Plasma Membrane	other
CDC42BPB	CDC42 binding protein kinase beta	Cytoplasm	kinase
CDC42EP1	CDC42 effector protein 1	Extracellular Space	other
ARHGEF9	Cdc42 guanine nucleotide exchange factor 9	Cytoplasm	other
CDV3	CDV3 homolog	Cytoplasm	other
CDC5L	cell division cycle 5 like	Nucleus	transcription regulator
CEP170B	centrosomal protein 170B	Other	other
CHGB	chromogranin B	Extracellular Space	other
C11orf58	chromosome 11 open reading frame 58	Other	other
C12orf57	chromosome 12 open reading frame 57	Cytoplasm	other
C16orf74	chromosome 16 open reading frame 74	Other	other
C18orf25	chromosome 18 open reading frame 25	Other	other
CSE1L	chromosome segregation 1 like	Nucleus	transporter
CFAP36	cilia and flagella associated protein 36	Extracellular Space	other
CIT	citron rho-interacting serine/threonine kinase	Cytoplasm	kinase
CMTM5	CKLF like MARVEL transmembrane domain containing 5	Other	cytokine
CLINT1	clathrin interactor 1	Cytoplasm	other
CLTB	clathrin light chain B	Plasma Membrane	other
CPSF6	cleavage and polyadenylation specific factor 6	Nucleus	other
CSTF2T	cleavage stimulation factor subunit 2 tau variant	Nucleus	other
CLUH	clustered mitochondria homolog	Cytoplasm	translation regulator
CMIP	c-Maf inducing protein	Cytoplasm	other
F2	coagulation factor II, prothrombin	Extracellular Space	peptidase
COQ9	coenzyme Q9	Cytoplasm	other
CCDC124	coiled-coil domain containing 124	Other	other
CCDC47	coiled-coil domain containing 47	Extracellular Space	other
CCDC6	coiled-coil domain containing 6	Cytoplasm	other
CCDC88A	coiled-coil domain containing 88A	Cytoplasm	other
CHCHD2	coiled-coil-helix-coiled-coil-helix domain containing 2	Cytoplasm	other
CIRBP	cold inducible RNA binding protein	Nucleus	translation regulator
C4A/C4B	complement C4A (Rodgers blood group)	Extracellular Space	other
CFH	complement factor H	Extracellular Space	other
COPS3	COP9 signalosome subunit 3	Cytoplasm	other
COPS4	COP9 signalosome subunit 4	Cytoplasm	peptidase
COPA	COPI coat complex subunit alpha	Cytoplasm	transporter
CPNE5	copine 5	Plasma Membrane	other
CPNE6	copine 6	Plasma Membrane	transporter
COBLL1	cordon-bleu WH2 repeat protein like 1	Extracellular Space	other
CORO1A	coronin 1A	Cytoplasm	other
CORO1B	coronin 1B	Cytoplasm	other
CRTC1	CREB regulated transcription coactivator 1	Nucleus	transcription regulator
CTTNBP2NL	CTTNBP2 N-terminal like	Cytoplasm	other
CUEDC2	CUE domain containing 2	Extracellular Space	other
Celf1	CUGBP, Elav-like family member 1	Nucleus	other
CUL3	cullin 3	Nucleus	enzyme
CDK17	cyclin dependent kinase 17	Cytoplasm	kinase
CDK5	cyclin dependent kinase 5	Nucleus	kinase
CDKL5	cyclin dependent kinase like 5	Nucleus	kinase
CYRIB	CYFIP related Rac1 interactor B	Extracellular Space	other
CBS/CBSL	cystathionine beta-synthase	Cytoplasm	enzyme
Cox6c	cytochrome c oxidase subunit 6C	Cytoplasm	enzyme
CYTH2	cytohesin 2	Cytoplasm	other
CLASP1	cytoplasmic linker associated protein 1	Cytoplasm	other
CPEB2	cytoplasmic polyadenylation element binding protein 2	Cytoplasm	translation regulator
CPEB3	cytoplasmic polyadenylation element binding protein 3	Cytoplasm	translation regulator
CPEB4	cytoplasmic polyadenylation element binding protein 4	Plasma Membrane	other
Ctla2a/Ctla2b	cytotoxic T lymphocyte-associated protein 2 alpha	Plasma Membrane	other
DDB1	damage specific DNA binding protein 1	Nucleus	other
DDX1	DEAD-box helicase 1	Nucleus	enzyme
DDX42	DEAD-box helicase 42	Cytoplasm	enzyme
DDX46	DEAD-box helicase 46	Nucleus	enzyme
DHX15	DEAH-box helicase 15	Nucleus	enzyme
DHX36	DEAH-box helicase 36	Cytoplasm	enzyme
DOCK3	dedicator of cytokinesis 3	Cytoplasm	other
DOCK4	dedicator of cytokinesis 4	Plasma Membrane	other
DOCK9	dedicator of cytokinesis 9	Cytoplasm	other
DHRS1	dehydrogenase/reductase 1	Cytoplasm	enzyme
DEK	DEK proto-oncogene	Nucleus	transcription regulator
DRG1	developmentally regulated GTP binding protein 1	Cytoplasm	enzyme
DGKE	diacylglycerol kinase epsilon	Cytoplasm	kinase
DIAPH1	diaphanous related formin 1	Plasma Membrane	other
DBT	dihydrolipoamide branched chain transacylase E2	Cytoplasm	enzyme
DPP10	dipeptidyl peptidase like 10	Extracellular Space	peptidase
DLG1	discs large MAGUK scaffold protein 1	Plasma Membrane	kinase
DLG2	discs large MAGUK scaffold protein 2	Plasma Membrane	kinase
DAAM1	dishevelled associated activator of morphogenesis 1	Cytoplasm	other
DLGAP2	DLG associated protein 2	Plasma Membrane	other
DLGAP4	DLG associated protein 4	Plasma Membrane	other
DMXL2	Dmx like 2	Cytoplasm	other
DDI2	DNA damage inducible 1 homolog 2	Plasma Membrane	transporter
POLDIP3	DNA polymerase delta interacting protein 3	Nucleus	other
TOP2B	DNA topoisomerase II beta	Nucleus	enzyme
DNAJA4	DnaJ heat shock protein family (Hsp40) member A4	Nucleus	other
DNAJB11	DnaJ heat shock protein family (Hsp40) member B11	Cytoplasm	other
DNAJB4	DnaJ heat shock protein family (Hsp40) member B4	Nucleus	other
DNAJB6	DnaJ heat shock protein family (Hsp40) member B6	Nucleus	transcription regulator
DNAJC7	DnaJ heat shock protein family (Hsp40) member C7	Cytoplasm	other
Dync1i2	dynein cytoplasmic 1 intermediate chain 2	Cytoplasm	other
DYNLRB1	dynein light chain roadblock-type 1	Cytoplasm	other
Dst	dystonin	Plasma Membrane	other
DAG1	dystroglycan 1	Plasma Membrane	transmembrane receptor
DMD	dystrophin	Plasma Membrane	other
EEA1	early endosome antigen 1	Cytoplasm	other
EHD1	EH domain containing 1	Cytoplasm	other
EHD4	EH domain containing 4	Plasma Membrane	enzyme
ETFB	electron transfer flavoprotein subunit beta	Cytoplasm	transporter
ERC1	ELKS/RAB6-interacting/CAST family member 1	Cytoplasm	other
ERC2	ELKS/RAB6-interacting/CAST family member 2	Cytoplasm	other
EFTUD2	elongation factor Tu GTP binding domain containing 2	Nucleus	enzyme
Elob	elongin B	Nucleus	transcription regulator
ENDOD1	endonuclease domain containing 1	Extracellular Space	enzyme
ERP44	endoplasmic reticulum protein 44	Cytoplasm	enzyme
ECI2	enoyl-CoA delta isomerase 2	Cytoplasm	enzyme
ECH1	enoyl-CoA hydratase 1	Cytoplasm	enzyme
EPHX1	epoxide hydrolase 1	Cytoplasm	peptidase
EPHX2	epoxide hydrolase 2	Cytoplasm	enzyme
EMC2	ER membrane protein complex subunit 2	Nucleus	other
EMC3	ER membrane protein complex subunit 3	Nucleus	other
EMC8	ER membrane protein complex subunit 8	Cytoplasm	other
ERH	ERH mRNA splicing and mitosis factor	Nucleus	other
ERI3	ERI1 exoribonuclease family member 3	Plasma Membrane	other
ERMN	ermin	Extracellular Space	other
EPB41L3	erythrocyte membrane protein band 4.1 like 3	Plasma Membrane	other
ESD	esterase D	Cytoplasm	enzyme
ETNPPL	ethanolamine-phosphate phospho-lyase	Cytoplasm	enzyme
EIF2A	eukaryotic translation initiation factor 2A	Cytoplasm	translation regulator
EIF3B	eukaryotic translation initiation factor 3 subunit B	Cytoplasm	translation regulator
EIF3E	eukaryotic translation initiation factor 3 subunit E	Cytoplasm	translation regulator
EIF3F	eukaryotic translation initiation factor 3 subunit F	Cytoplasm	translation regulator
EIF3G	eukaryotic translation initiation factor 3 subunit G	Cytoplasm	translation regulator
EIF4G2	eukaryotic translation initiation factor 4 gamma 2	Cytoplasm	translation regulator
EIF4G3	eukaryotic translation initiation factor 4 gamma 3	Cytoplasm	translation regulator
EIF4A3	eukaryotic translation initiation factor 4A3	Nucleus	enzyme
Eif4a3l2	eukaryotic translation initiation factor 4A3 like 2	Other	other
EIF4H	eukaryotic translation initiation factor 4H	Cytoplasm	translation regulator
EIF5A2	eukaryotic translation initiation factor 5A2	Cytoplasm	translation regulator
EXOC7	exocyst complex component 7	Cytoplasm	transporter
XPO7	exportin 7	Nucleus	transporter
FAM131B	family with sequence similarity 131 member B	Other	other
Fam177a/Fam177a2	family with sequence similarity 177, member A	Other	other
FAM219A	family with sequence similarity 219 member A	Other	other
FUBP1	far upstream element binding protein 1	Nucleus	transcription regulator
FUBP3	far upstream element binding protein 3	Nucleus	transcription regulator
FADS1	fatty acid desaturase 1	Plasma Membrane	enzyme
FETUB	fetuin B	Extracellular Space	other
FBL	fibrillarin	Nucleus	enzyme
FGA	fibrinogen alpha chain	Extracellular Space	other
FGB	fibrinogen beta chain	Extracellular Space	other
FGF12	fibroblast growth factor 12	Extracellular Space	other
FGFR2	fibroblast growth factor receptor 2	Plasma Membrane	kinase
FKBP10	FKBP prolyl isomerase 10	Cytoplasm	enzyme
FKBP2	FKBP prolyl isomerase 2	Cytoplasm	enzyme
FKBP5	FKBP prolyl isomerase 5	Nucleus	enzyme
Fmo9	flavin containing monooxygenase 9	Other	other
FXR1	FMR1 autosomal homolog 1	Cytoplasm	other
FOXO1	forkhead box O1	Nucleus	transcription regulator
FOXO3	forkhead box O3	Nucleus	transcription regulator
FMNL2	formin like 2	Cytoplasm	other
FN3KRP	fructosamine 3 kinase related protein	Cytoplasm	kinase
GNL1	G protein nucleolar 1 (putative)	Nucleus	other
GPS1	G protein pathway suppressor 1	Nucleus	other
GNA12	G protein subunit alpha 12	Plasma Membrane	enzyme
GNA14	G protein subunit alpha 14	Plasma Membrane	enzyme
GNAZ	G protein subunit alpha z	Plasma Membrane	enzyme
GPR158	G protein-coupled receptor 158	Plasma Membrane	G-protein coupled receptor
GRK2	G protein-coupled receptor kinase 2	Cytoplasm	kinase
G3BP1	G3BP stress granule assembly factor 1	Nucleus	enzyme
GABARAPL2	GABA type A receptor associated protein like 2	Cytoplasm	other
GALK1	galactokinase 1	Cytoplasm	kinase
LGALS1	galectin 1	Extracellular Space	other
LGALS3BP	galectin 3 binding protein	Plasma Membrane	transmembrane receptor
GABRB2	gamma-aminobutyric acid type A receptor subunit beta2	Plasma Membrane	ion channel
GABRB3	gamma-aminobutyric acid type A receptor subunit beta3	Plasma Membrane	ion channel
GGACT	gamma-glutamylamine cyclotransferase	Cytoplasm	enzyme
GDAP1L1	ganglioside induced differentiation associated protein 1 like 1	Other	other
GJB6	gap junction protein beta 6	Plasma Membrane	transporter
GATAD2B	GATA zinc finger domain containing 2B	Nucleus	transcription regulator
GCN1	GCN1 activator of EIF2AK4	Cytoplasm	translation regulator
GSN	gelsolin	Extracellular Space	other
GTF2B	general transcription factor IIB	Nucleus	transcription regulator
GPHN	gephyrin	Plasma Membrane	enzyme
GIT1	GIT ArfGAP 1	Nucleus	kinase
GNPDA1	glucosamine-6-phosphate deaminase 1	Cytoplasm	enzyme
GNPDA2	glucosamine-6-phosphate deaminase 2	Nucleus	enzyme
GRIA1	glutamate ionotropic receptor AMPA type subunit 1	Plasma Membrane	ion channel
GRIN1	glutamate ionotropic receptor NMDA type subunit 1	Plasma Membrane	ion channel
GRIN2A	glutamate ionotropic receptor NMDA type subunit 2A	Plasma Membrane	ion channel
GRM5	glutamate metabotropic receptor 5	Plasma Membrane	G-protein coupled receptor
GPT	glutamic--pyruvic transaminase	Cytoplasm	enzyme
GPT2	glutamic--pyruvic transaminase 2	Cytoplasm	enzyme
Qars	glutaminyl-tRNA synthetase	Cytoplasm	enzyme
GLRX2	glutaredoxin 2	Cytoplasm	enzyme
GSTK1	glutathione S-transferase kappa 1	Cytoplasm	enzyme
Gm11214	glyceraldehyde-3-phosphate dehydrogenase pseudogene	Other	other
GPD1	glycerol-3-phosphate dehydrogenase 1	Cytoplasm	enzyme
GLDC	glycine decarboxylase	Cytoplasm	enzyme
GARS1	glycyl-tRNA synthetase 1	Cytoplasm	enzyme
GRHPR	glyoxylate and hydroxypyruvate reductase	Cytoplasm	enzyme
GBF1	golgi brefeldin A resistant guanine nucleotide exchange factor 1	Cytoplasm	other
GOLGA2	golgin A2	Cytoplasm	other
GOLGB1	golgin B1	Cytoplasm	other
GAB1	GRB2 associated binding protein 1	Cytoplasm	other
GRIPAP1	GRIP1 associated protein 1	Plasma Membrane	other
GAPVD1	GTPase activating protein and VPS9 domains 1	Cytoplasm	other
GUCY1B1	guanylate cyclase 1 soluble subunit beta 1	Cytoplasm	enzyme
H1-2	H1.2 linker histone, cluster member	Nucleus	other
HP	haptoglobin	Extracellular Space	peptidase
Hspa1b	heat shock protein 1B	Cytoplasm	other
HSPA1L	heat shock protein family A (Hsp70) member 1 like	Cytoplasm	other
HSPA1A/HSPA1B	heat shock protein family A (Hsp70) member 1A	Cytoplasm	enzyme
HERC1	HECT and RLD domain containing E3 ubiquitin protein ligase family member 1	Cytoplasm	other
HECTD1	HECT domain E3 ubiquitin protein ligase 1	Other	enzyme
HEPACAM	hepatic and glial cell adhesion molecule	Plasma Membrane	other
HGS	hepatocyte growth factor-regulated tyrosine kinase substrate	Cytoplasm	other
HNRNPD	heterogeneous nuclear ribonucleoprotein D	Nucleus	transcription regulator
HNRNPM	heterogeneous nuclear ribonucleoprotein M	Nucleus	other
HNRNPR	heterogeneous nuclear ribonucleoprotein R	Nucleus	other
Hmgb3	high mobility group box 3	Nucleus	other
HM13	histocompatibility minor 13	Cytoplasm	peptidase
HDAC1	histone deacetylase 1	Nucleus	transcription regulator
HDAC2	histone deacetylase 2	Nucleus	transcription regulator
HTATSF1	HIV-1 Tat specific factor 1	Nucleus	transcription regulator
HTRA1	HtrA serine peptidase 1	Extracellular Space	peptidase
HIP1	huntingtin interacting protein 1	Cytoplasm	other
HSD17B11	hydroxysteroid 17-beta dehydrogenase 11	Cytoplasm	enzyme
HSD17B4	hydroxysteroid 17-beta dehydrogenase 4	Cytoplasm	enzyme
Hsdl2	hydroxysteroid dehydrogenase like 2	Cytoplasm	other
IK	IK cytokine	Extracellular Space	cytokine
IPO4	importin 4	Nucleus	transporter
IPO5	importin 5	Nucleus	transporter
IPO7	importin 7	Nucleus	transporter
PPA1	inorganic pyrophosphatase 1	Cytoplasm	enzyme
IMPDH2	inosine monophosphate dehydrogenase 2	Cytoplasm	enzyme
ITPA	inosine triphosphatase	Cytoplasm	enzyme
IMPA1	inositol monophosphatase 1	Cytoplasm	phosphatase
INPP4A	inositol polyphosphate-4-phosphatase type I A	Cytoplasm	phosphatase
ITPKA	inositol-trisphosphate 3-kinase A	Cytoplasm	kinase
IGFBP5	insulin like growth factor binding protein 5	Extracellular Space	other
ILK	integrin linked kinase	Plasma Membrane	kinase
ITGB8	integrin subunit beta 8	Plasma Membrane	other
ITIH4	inter-alpha-trypsin inhibitor heavy chain 4	Extracellular Space	other
ICAM5	intercellular adhesion molecule 5	Plasma Membrane	other
IRF2BPL	interferon regulatory factor 2 binding protein like	Nucleus	enzyme
IL18	interleukin 18	Extracellular Space	cytokine
IQSEC2	IQ motif and Sec7 domain ArfGEF 2	Cytoplasm	other
IDH3G	isocitrate dehydrogenase (NAD(+)) 3 non-catalytic subunit gamma	Cytoplasm	enzyme
JCAD	junctional cadherin 5 associated	Plasma Membrane	other
JPT1	Jupiter microtubule associated homolog 1	Nucleus	other
KLHDC7A	kelch domain containing 7A	Other	other
KBTBD11	kelch repeat and BTB domain containing 11	Other	other
KIAA1191	KIAA1191	Cytoplasm	other
KIDINS220	kinase D interacting substrate 220	Nucleus	transcription regulator
Ktn1	kinectin 1	Cytoplasm	other
KIFBP	kinesin family binding protein	Cytoplasm	enzyme
KIF1B	kinesin family member 1B	Cytoplasm	transporter
KIF2A	kinesin family member 2A	Cytoplasm	other
KIF3C	kinesin family member 3C	Cytoplasm	other
KIF5A	kinesin family member 5A	Cytoplasm	transporter
KLC2	kinesin light chain 2	Cytoplasm	other
L1CAM	L1 cell adhesion molecule	Plasma Membrane	other
LANCL2	LanC like 2	Plasma Membrane	other
LRP4	LDL receptor related protein 4	Extracellular Space	other
LMAN1	lectin, mannose binding 1	Cytoplasm	other
LCMT1	leucine carboxyl methyltransferase 1	Cytoplasm	enzyme
LRPPRC	leucine rich pentatricopeptide repeat containing	Cytoplasm	other
LRRC47	leucine rich repeat containing 47	Other	other
LRRC8A	leucine rich repeat containing 8 VRAC subunit A	Plasma Membrane	ion channel
LETM1	leucine zipper and EF-hand containing transmembrane protein 1	Cytoplasm	transporter
LNPEP	leucyl and cystinyl aminopeptidase	Cytoplasm	peptidase
LTA4H	leukotriene A4 hydrolase	Cytoplasm	enzyme
LIMCH1	LIM and calponin homology domains 1	Cytoplasm	other
LIMA1	LIM domain and actin binding 1	Cytoplasm	other
LMBRD2	LMBR1 domain containing 2	Other	other
LUC7L	LUC7 like	Nucleus	other
LUC7L2	LUC7 like 2, pre-mRNA splicing factor	Nucleus	other
LNPK	lunapark, ER junction formation factor	Cytoplasm	other
KARS1	lysyl-tRNA synthetase 1	Cytoplasm	enzyme
HLA-A	major histocompatibility complex, class I, A	Plasma Membrane	other
MADD	MAP kinase activating death domain	Cytoplasm	other
MAP7D1	MAP7 domain containing 1	Cytoplasm	other
MTOR	mechanistic target of rapamycin kinase	Nucleus	kinase
MPP2	membrane palmitoylated protein 2	Plasma Membrane	kinase
MANF	mesencephalic astrocyte derived neurotrophic factor	Extracellular Space	other
MTDH	metadherin	Cytoplasm	transcription regulator
METAP1	methionyl aminopeptidase 1	Cytoplasm	peptidase
MECP2	methyl-CpG binding protein 2	Nucleus	transcription regulator
MVK	mevalonate kinase	Cytoplasm	kinase
MIA3	MIA SH3 domain ER export factor 3	Cytoplasm	other
MFAP1	microfibril associated protein 1	Extracellular Space	other
MFAP3L	microfibril associated protein 3 like	Nucleus	other
MID1IP1	MID1 interacting protein 1	Cytoplasm	other
MINK1	misshapen like kinase 1	Cytoplasm	kinase
MTCH2	mitochondrial carrier 2	Cytoplasm	other
MRPS36	mitochondrial ribosomal protein S36	Cytoplasm	other
MAP2K7	mitogen-activated protein kinase kinase 7	Cytoplasm	kinase
MLLT11	MLLT11 transcription factor 7 cofactor	Cytoplasm	other
MSN	moesin	Plasma Membrane	other
MAOB	monoamine oxidase B	Cytoplasm	enzyme
MTSS2	MTSS I-BAR domain containing 2	Plasma Membrane	other
MEGF10	multiple EGF like domains 10	Plasma Membrane	transmembrane receptor
MSI2	musashi RNA binding protein 2	Cytoplasm	other
MBNL2	muscleblind like splicing regulator 2	Nucleus	other
MYEF2	myelin expression factor 2	Nucleus	transcription regulator
MRTFB	myocardin related transcription factor B	Nucleus	transcription regulator
MEF2D	myocyte enhancer factor 2D	Nucleus	transcription regulator
MYH14	myosin heavy chain 14	Extracellular Space	enzyme
MYH9	myosin heavy chain 9	Cytoplasm	enzyme
MTMR3	myotubularin related protein 3	Cytoplasm	phosphatase
NSDHL	NAD(P) dependent steroid dehydrogenase-like	Cytoplasm	enzyme
NDUFA3	NADH:ubiquinone oxidoreductase subunit A3	Cytoplasm	enzyme
NAA15	N-alpha-acetyltransferase 15, NatA auxiliary subunit	Nucleus	transcription regulator
NDRG4	NDRG family member 4	Plasma Membrane	other
NECAP1	NECAP endocytosis associated 1	Plasma Membrane	other
NUB1	negative regulator of ubiquitin like proteins 1	Nucleus	other
NEO1	neogenin 1	Plasma Membrane	transcription regulator
NENF	neudesin neurotrophic factor	Extracellular Space	growth factor
NELL2	neural EGFL like 2	Extracellular Space	other
NRXN2	neurexin 2	Plasma Membrane	transporter
Nrxn3	neurexin III	Plasma Membrane	other
NBEA	neurobeachin	Cytoplasm	other
NF1	neurofibromin 1	Cytoplasm	other
NCS1	neuronal calcium sensor 1	Plasma Membrane	other
NPTX2	neuronal pentraxin 2	Extracellular Space	other
NCEH1	neutral cholesterol ester hydrolase 1	Plasma Membrane	enzyme
NFS1	NFS1 cysteine desulfurase	Cytoplasm	enzyme
NIBAN1	niban apoptosis regulator 1	Cytoplasm	other
NIBAN2	niban apoptosis regulator 2	Cytoplasm	transcription regulator
Nnt	nicotinamide nucleotide transhydrogenase	Cytoplasm	enzyme
NEK7	NIMA related kinase 7	Nucleus	kinase
NMT2	N-myristoyltransferase 2	Cytoplasm	enzyme
NOTCH1	notch receptor 1	Plasma Membrane	transcription regulator
NFIA	nuclear factor I A	Nucleus	transcription regulator
NUFIP2	nuclear FMR1 interacting protein 2	Cytoplasm	other
NRF1	nuclear respiratory factor 1	Nucleus	transcription regulator
NUP98	nucleoporin 98 and 96 precursor	Nucleus	transporter
NAP1L5	nucleosome assembly protein 1 like 5	Other	other
OCIAD1	OCIA domain containing 1	Cytoplasm	other
OGDHL	oxoglutarate dehydrogenase L	Cytoplasm	enzyme
PAK3	p21 (RAC1) activated kinase 3	Cytoplasm	kinase
PALMD	palmdelphin	Cytoplasm	other
PON2	paraoxonase 2	Plasma Membrane	enzyme
PSPC1	paraspeckle component 1	Nucleus	transcription regulator
PXN	paxillin	Cytoplasm	other
Pbp2	phosphatidylethanolamine binding protein 2	Cytoplasm	other
PI4KA	phosphatidylinositol 4-kinase alpha	Cytoplasm	kinase
PI4K2A	phosphatidylinositol 4-kinase type 2 alpha	Cytoplasm	kinase
PITPNB	phosphatidylinositol transfer protein beta	Cytoplasm	transporter
PIP5K1C	phosphatidylinositol-4-phosphate 5-kinase type 1 gamma	Plasma Membrane	kinase
PIP4K2B	phosphatidylinositol-5-phosphate 4-kinase type 2 beta	Cytoplasm	kinase
PIP4K2C	phosphatidylinositol-5-phosphate 4-kinase type 2 gamma	Cytoplasm	kinase
PDE1A	phosphodiesterase 1A	Cytoplasm	enzyme
PDE1B	phosphodiesterase 1B	Cytoplasm	enzyme
PDE4A	phosphodiesterase 4A	Cytoplasm	enzyme
PDE4B	phosphodiesterase 4B	Cytoplasm	enzyme
PACS1	phosphofurin acidic cluster sorting protein 1	Cytoplasm	other
PGD	phosphogluconate dehydrogenase	Cytoplasm	enzyme
PGP	phosphoglycolate phosphatase	Cytoplasm	enzyme
PLA2G7	phospholipase A2 group VII	Extracellular Space	enzyme
PLCG1	phospholipase C gamma 1	Cytoplasm	enzyme
PLTP	phospholipid transfer protein	Extracellular Space	enzyme
GART	phosphoribosylglycinamide formyltransferase, phosphoribosylglycinamide synthetase, phosphoribosylaminoimidazole synthetase	Cytoplasm	enzyme
PSPH	phosphoserine phosphatase	Cytoplasm	phosphatase
PHYH	phytanoyl-CoA 2-hydroxylase	Cytoplasm	enzyme
PCLO	piccolo presynaptic cytomatrix protein	Cytoplasm	transporter
PNN	pinin, desmosome associated protein	Plasma Membrane	other
PAFAH1B2	platelet activating factor acetylhydrolase 1b catalytic subunit 2	Cytoplasm	enzyme
PSD2	pleckstrin and Sec7 domain containing 2	Plasma Membrane	other
PABPC4	poly(A) binding protein cytoplasmic 4	Cytoplasm	translation regulator
PABPN1	poly(A) binding protein nuclear 1	Nucleus	enzyme
Pabpc6	poly(A) binding protein, cytoplasmic 6	Cytoplasm	other
Gm6096	predicted gene 6096	Other	other
Gm27021	predicted gene, 27021	Other	other
PRPF4B	pre-mRNA processing factor 4B	Nucleus	kinase
PRPF6	pre-mRNA processing factor 6	Nucleus	transcription regulator
PRPF8	pre-mRNA processing factor 8	Nucleus	other
PRICKLE2	prickle planar cell polarity protein 2	Nucleus	other
PENK	proenkephalin	Extracellular Space	other
PDCD10	programmed cell death 10	Cytoplasm	other
PDCD4	programmed cell death 4	Nucleus	other
PCNA	proliferating cell nuclear antigen	Nucleus	enzyme
Pcna-ps2	proliferating cell nuclear antigen pseudogene 2	Other	other
PRRC2C	proline rich coiled-coil 2C	Cytoplasm	other
PREP	prolyl endopeptidase	Cytoplasm	peptidase
PCSK2	proprotein convertase subtilisin/kexin type 2	Extracellular Space	peptidase
PSAP	prosaposin	Extracellular Space	other
PSMA4	proteasome 20S subunit alpha 4	Cytoplasm	peptidase
PSMC2	proteasome 26S subunit, ATPase 2	Nucleus	peptidase
PSMC6	proteasome 26S subunit, ATPase 6	Nucleus	peptidase
PSMD11	proteasome 26S subunit, non-ATPase 11	Cytoplasm	other
PSMD13	proteasome 26S subunit, non-ATPase 13	Cytoplasm	peptidase
PSMD14	proteasome 26S subunit, non-ATPase 14	Cytoplasm	peptidase
PSMD2	proteasome 26S subunit, non-ATPase 2	Cytoplasm	other
PSMD7	proteasome 26S subunit, non-ATPase 7	Cytoplasm	other
PSMD9	proteasome 26S subunit, non-ATPase 9	Cytoplasm	transcription regulator
PSME3	proteasome activator subunit 3	Cytoplasm	peptidase
PRKAB2	protein kinase AMP-activated non-catalytic subunit beta 2	Cytoplasm	kinase
PRKAR1A	protein kinase cAMP-dependent type I regulatory subunit alpha	Cytoplasm	kinase
PRKAR2A	protein kinase cAMP-dependent type II regulatory subunit alpha	Cytoplasm	kinase
PRKAR2B	protein kinase cAMP-dependent type II regulatory subunit beta	Cytoplasm	kinase
PPP1R2	protein phosphatase 1 regulatory inhibitor subunit 2	Cytoplasm	phosphatase
PPP1R12A	protein phosphatase 1 regulatory subunit 12A	Cytoplasm	phosphatase
PPP5C	protein phosphatase 5 catalytic subunit	Nucleus	phosphatase
PPM1E	protein phosphatase, Mg2+/Mn2+ dependent 1E	Nucleus	phosphatase
PPM1H	protein phosphatase, Mg2+/Mn2+ dependent 1H	Nucleus	phosphatase
PTK2	protein tyrosine kinase 2	Cytoplasm	kinase
PTPMT1	protein tyrosine phosphatase mitochondrial 1	Cytoplasm	phosphatase
PTPN11	protein tyrosine phosphatase non-receptor type 11	Cytoplasm	phosphatase
PTPRF	protein tyrosine phosphatase receptor type F	Plasma Membrane	phosphatase
PCDH10	protocadherin 10	Plasma Membrane	other
PUM1	pumilio RNA binding family member 1	Cytoplasm	other
PNP	purine nucleoside phosphorylase	Nucleus	enzyme
PDXK	pyridoxal kinase	Cytoplasm	kinase
PLPBP	pyridoxal phosphate binding protein	Cytoplasm	enzyme
PDP1	pyruvate dehydrogenase phosphatase catalytic subunit 1	Cytoplasm	phosphatase
RAB12	RAB12, member RAS oncogene family	Cytoplasm	enzyme
RAB3C	RAB3C, member RAS oncogene family	Cytoplasm	enzyme
RAD21	RAD21 cohesin complex component	Nucleus	transcription regulator
RDX	radixin	Cytoplasm	other
RANBP9	RAN binding protein 9	Nucleus	other
RAPGEF2	Rap guanine nucleotide exchange factor 2	Cytoplasm	other
RAPGEF6	Rap guanine nucleotide exchange factor 6	Plasma Membrane	other
RAP1A	RAP1A, member of RAS oncogene family	Cytoplasm	enzyme
RAP2B	RAP2B, member of RAS oncogene family	Plasma Membrane	enzyme
RASSF2	Ras association domain family member 2	Nucleus	kinase
RHOB	ras homolog family member B	Cytoplasm	enzyme
RASAL2	RAS protein activator like 2	Extracellular Space	other
RBBP4	RB binding protein 4, chromatin remodeling factor	Nucleus	enzyme
RBBP9	RB binding protein 9, serine hydrolase	Nucleus	other
RB1CC1	RB1 inducible coiled-coil 1	Nucleus	other
REST	RE1 silencing transcription factor	Nucleus	transcription regulator
RLBP1	retinaldehyde binding protein 1	Cytoplasm	transporter
RIPOR1	RHO family interacting cell polarization regulator 1	Cytoplasm	other
ARHGAP1	Rho GTPase activating protein 1	Cytoplasm	other
ARHGAP26	Rho GTPase activating protein 26	Cytoplasm	other
ARHGAP32	Rho GTPase activating protein 32	Cytoplasm	other
ARHGEF12	Rho guanine nucleotide exchange factor 12	Cytoplasm	other
ARHGEF7	Rho guanine nucleotide exchange factor 7	Cytoplasm	other
RNH1	ribonuclease/angiogenin inhibitor 1	Cytoplasm	other
RPL17	ribosomal protein L17	Cytoplasm	other
RPL18A	ribosomal protein L18a	Cytoplasm	other
Gm17541	ribosomal protein L18A pseudogene	Other	other
Rpl23a	ribosomal protein L23A	Nucleus	other
Rpl23a-ps3	ribosomal protein L23A, pseudogene 3	Other	other
RPL3	ribosomal protein L3	Nucleus	other
RPL35A	ribosomal protein L35a	Cytoplasm	other
RPLP0	ribosomal protein lateral stalk subunit P0	Cytoplasm	other
RPS11	ribosomal protein S11	Cytoplasm	other
RPS16	ribosomal protein S16	Cytoplasm	other
RPS6	ribosomal protein S6	Cytoplasm	other
RPS9	ribosomal protein S9	Cytoplasm	translation regulator
RNF20	ring finger protein 20	Nucleus	enzyme
RNF214	ring finger protein 214	Other	other
RBM22	RNA binding motif protein 22	Nucleus	other
RBMX	RNA binding motif protein X-linked	Nucleus	other
RNPS1	RNA binding protein with serine rich domain 1	Nucleus	other
RNMT	RNA guanine-7 methyltransferase	Nucleus	enzyme
RUVBL2	RuvB like AAA ATPase 2	Nucleus	transcription regulator
RYR2	ryanodine receptor 2	Plasma Membrane	ion channel
S100A16	S100 calcium binding protein A16	Nucleus	other
SBDS	SBDS ribosome maturation factor	Nucleus	other
SEC16A	SEC16 homolog A, endoplasmic reticulum export factor	Cytoplasm	other
SEC23A	SEC23 homolog A, COPII coat complex component	Cytoplasm	transporter
SEC23B	SEC23 homolog B, COPII coat complex component	Extracellular Space	transporter
SEC31A	SEC31 homolog A, COPII coat complex component	Cytoplasm	other
SEC61B	SEC61 translocon subunit beta	Cytoplasm	transporter
SEC62	SEC62 homolog, preprotein translocation factor	Cytoplasm	transporter
SEC63	SEC63 homolog, protein translocation regulator	Cytoplasm	transporter
SCRN1	secernin 1	Cytoplasm	other
SAR1A	secretion associated Ras related GTPase 1A	Cytoplasm	enzyme
SCG2	secretogranin II	Extracellular Space	cytokine
SCAMP5	secretory carrier membrane protein 5	Cytoplasm	other
SEMA4A	semaphorin 4A	Plasma Membrane	other
SEMA4B	semaphorin 4B	Plasma Membrane	other
SEPTIN2	septin 2	Cytoplasm	enzyme
SEPTIN3	septin 3	Cytoplasm	enzyme
SEPTIN9	septin 9	Cytoplasm	enzyme
SRSF1	serine and arginine rich splicing factor 1	Nucleus	other
SHMT2	serine hydroxymethyltransferase 2	Cytoplasm	enzyme
Srrm2	serine/arginine repetitive matrix 2	Nucleus	other
SERPINE2	serpin family E member 2	Extracellular Space	other
SERPINH1	serpin family H member 1	Extracellular Space	other
SARS1	seryl-tRNA synthetase 1	Cytoplasm	enzyme
SUGT1	SGT1 homolog, MIS12 kinetochore complex assembly cochaperone	Nucleus	other
SHANK2	SH3 and multiple ankyrin repeat domains 2	Plasma Membrane	other
SIPA1L1	signal induced proliferation associated 1 like 1	Cytoplasm	other
SPCS1	signal peptidase complex subunit 1	Cytoplasm	peptidase
SRP68	signal recognition particle 68	Nucleus	other
STAT3	signal transducer and activator of transcription 3	Nucleus	transcription regulator
SMAP2	small ArfGAP2	Cytoplasm	other
SGTB	small glutamine rich tetratricopeptide repeat co-chaperone beta	Other	other
Gm5145	small nuclear ribonucleoprotein polypeptide A pseudogene	Other	other
SNRPN	small nuclear ribonucleoprotein polypeptide N	Nucleus	other
SNRPB	small nuclear ribonucleoprotein polypeptides B and B1	Nucleus	other
SSB	small RNA binding exonuclease protection factor La	Nucleus	enzyme
SLC12A2	solute carrier family 12 member 2	Plasma Membrane	transporter
SLC2A1	solute carrier family 2 member 1	Plasma Membrane	transporter
SLC20A1	solute carrier family 20 member 1	Plasma Membrane	transporter
SLC20A2	solute carrier family 20 member 2	Plasma Membrane	transporter
Slc25a1	solute carrier family 25 (mitochondrial carrier, citrate transporter), member 1	Cytoplasm	transporter
SLC39A10	solute carrier family 39 member 10	Extracellular Space	transporter
SLC4A10	solute carrier family 4 member 10	Plasma Membrane	transporter
SLC4A8	solute carrier family 4 member 8	Plasma Membrane	transporter
SLC44A1	solute carrier family 44 member 1	Plasma Membrane	transporter
SLC6A17	solute carrier family 6 member 17	Cytoplasm	transporter
SLC7A14	solute carrier family 7 member 14	Cytoplasm	other
SLC7A2	solute carrier family 7 member 2	Plasma Membrane	transporter
SNX2	sorting nexin 2	Cytoplasm	transporter
SPTBN4	spectrin beta, non-erythrocytic 4	Cytoplasm	other
SPAG7	sperm associated antigen 7	Nucleus	other
SPAG9	sperm associated antigen 9	Cytoplasm	other
SPIN1	spindlin 1	Nucleus	other
SPIRE1	spire type actin nucleation factor 1	Cytoplasm	other
Sf3a2	splicing factor 3a, subunit 2	Nucleus	other
SF3B2	splicing factor 3b subunit 2	Nucleus	other
SPON1	spondin 1	Extracellular Space	other
SUPT5H	SPT5 homolog, DSIF elongation factor subunit	Nucleus	transcription regulator
SUPT6H	SPT6 homolog, histone chaperone and transcription elongation factor	Nucleus	transcription regulator
STARD7	StAR related lipid transfer domain containing 7	Cytoplasm	other
STAU1	staufen double-stranded RNA binding protein 1	Cytoplasm	transporter
SOAT1	sterol O-acyltransferase 1	Cytoplasm	enzyme
STUB1	STIP1 homology and U-box containing protein 1	Cytoplasm	enzyme
STRN	striatin	Cytoplasm	other
STRN3	striatin 3	Nucleus	transcription regulator
SDF2	stromal cell derived factor 2	Extracellular Space	enzyme
SDF4	stromal cell derived factor 4	Cytoplasm	other
SMC3	structural maintenance of chromosomes 3	Nucleus	other
STT3B	STT3 oligosaccharyltransferase complex catalytic subunit B	Cytoplasm	enzyme
SUCLG1	succinate-CoA ligase GDP/ADP-forming subunit alpha	Cytoplasm	enzyme
SMARCC2	SWI/SNF related, matrix associated, actin dependent regulator of chromatin subfamily c member 2	Nucleus	transcription regulator
SMARCA2	SWI/SNF related, matrix associated, actin dependent regulator of chromatin, subfamily a, member 2	Nucleus	transcription regulator
SMARCA4	SWI/SNF related, matrix associated, actin dependent regulator of chromatin, subfamily a, member 4	Nucleus	transcription regulator
SMARCA5	SWI/SNF related, matrix associated, actin dependent regulator of chromatin, subfamily a, member 5	Nucleus	transcription regulator
SMARCE1	SWI/SNF related, matrix associated, actin dependent regulator of chromatin, subfamily e, member 1	Nucleus	transcription regulator
SWI5	SWI5 homologous recombination repair protein	Nucleus	other
SNAP29	synaptosome associated protein 29	Cytoplasm	other
SYT11	synaptotagmin 11	Cytoplasm	transporter
SYT5	synaptotagmin 5	Cytoplasm	transporter
SYNCRIP	synaptotagmin binding cytoplasmic RNA interacting protein	Nucleus	other
SDCBP	syndecan binding protein	Plasma Membrane	enzyme
STXBP3	syntaxin binding protein 3	Plasma Membrane	transporter
STXBP5L	syntaxin binding protein 5 like	Cytoplasm	other
TLN1	talin 1	Plasma Membrane	other
TLN2	talin 2	Nucleus	other
TNKS1BP1	tankyrase 1 binding protein 1	Nucleus	other
TAOK1	TAO kinase 1	Cytoplasm	kinase
TAX1BP1	Tax1 binding protein 1	Cytoplasm	other
TBR1	T-box brain transcription factor 1	Nucleus	transcription regulator
TEX15	testis expressed 15, meiosis and synapsis associated	Extracellular Space	other
TSPAN31	tetraspanin 31	Plasma Membrane	other
THOP1	thimet oligopeptidase 1	Cytoplasm	peptidase
TXNRD1	thioredoxin reductase 1	Cytoplasm	enzyme
TMX3	thioredoxin related transmembrane protein 3	Cytoplasm	enzyme
TOLLIP	toll interacting protein	Cytoplasm	other
TFG	trafficking from ER to golgi regulator	Cytoplasm	other
TRAPPC2L	trafficking protein particle complex subunit 2L	Cytoplasm	other
TAMALIN	trafficking regulator and scaffold protein tamalin	Plasma Membrane	other
TRA2A	transformer 2 alpha homolog	Nucleus	other
TRA2B	transformer 2 beta homolog	Nucleus	other
TACC1	transforming acidic coiled-coil containing protein 1	Nucleus	other
TGM2	transglutaminase 2	Cytoplasm	enzyme
TOMM40	translocase of outer mitochondrial membrane 40	Cytoplasm	ion channel
TOMM70	translocase of outer mitochondrial membrane 70	Cytoplasm	transporter
TPR	translocated promoter region, nuclear basket protein	Nucleus	other
TMED4	transmembrane p24 trafficking protein 4	Cytoplasm	transporter
TMED9	transmembrane p24 trafficking protein 9	Cytoplasm	transporter
TMEM132A	transmembrane protein 132A	Cytoplasm	other
TMEM263	transmembrane protein 263	Other	other
TRIO	trio Rho guanine nucleotide exchange factor	Cytoplasm	kinase
TRIM2	tripartite motif containing 2	Cytoplasm	enzyme
TRIM9	tripartite motif containing 9	Cytoplasm	enzyme
TPP2	tripeptidyl peptidase 2	Cytoplasm	peptidase
Tpm2	tropomyosin 2, beta	Cytoplasm	other
Tpm4	tropomyosin 4	Cytoplasm	other
TUBA1C	tubulin alpha 1c	Cytoplasm	other
TBCA	tubulin folding cofactor A	Cytoplasm	other
TFIP11	tuftelin interacting protein 11	Extracellular Space	other
TSG101	tumor susceptibility 101	Cytoplasm	transcription regulator
TTYH3	tweety family member 3	Plasma Membrane	ion channel
YARS1	tyrosyl-tRNA synthetase 1	Cytoplasm	enzyme
UBQLN4	ubiquilin 4	Cytoplasm	other
UBE2K	ubiquitin conjugating enzyme E2 K	Cytoplasm	transcription regulator
UBE2Z	ubiquitin conjugating enzyme E2 Z	Nucleus	enzyme
UCHL5	ubiquitin C-terminal hydrolase L5	Cytoplasm	peptidase
UBL4A	ubiquitin like 4A	Cytoplasm	enzyme
UBL5	ubiquitin like 5	Cytoplasm	other
UBL7	ubiquitin like 7	Other	other
UBA2	ubiquitin like modifier activating enzyme 2	Cytoplasm	enzyme
UBR4	ubiquitin protein ligase E3 component n-recognin 4	Nucleus	enzyme
UBE3A	ubiquitin protein ligase E3A	Nucleus	enzyme
UFD1	ubiquitin recognition factor in ER associated degradation 1	Cytoplasm	peptidase
USP14	ubiquitin specific peptidase 14	Cytoplasm	peptidase
USP4	ubiquitin specific peptidase 4	Nucleus	peptidase
USP47	ubiquitin specific peptidase 47	Cytoplasm	peptidase
USP54	ubiquitin specific peptidase 54	Other	peptidase
USP7	ubiquitin specific peptidase 7	Nucleus	peptidase
UBE4B	ubiquitination factor E4B	Cytoplasm	enzyme
UBXN4	UBX domain protein 4	Extracellular Space	other
Ugt1a7c	UDP glucuronosyltransferase 1 family, polypeptide A7C	Cytoplasm	enzyme
Ugt1a8	UDP glucuronosyltransferase 1 family, polypeptide A8	Cytoplasm	other
UGT1A1	UDP glucuronosyltransferase family 1 member A1	Cytoplasm	enzyme
UGT1A3	UDP glucuronosyltransferase family 1 member A3	Cytoplasm	enzyme
UGT1A4	UDP glucuronosyltransferase family 1 member A4	Cytoplasm	enzyme
UGT1A6	UDP glucuronosyltransferase family 1 member A6	Cytoplasm	enzyme
UGT1A9 (includes others)	UDP glucuronosyltransferase family 1 member A9	Cytoplasm	enzyme
UGP2	UDP-glucose pyrophosphorylase 2	Cytoplasm	enzyme
UHRF1BP1L	UHRF1 binding protein 1 like	Cytoplasm	other
UNC13A	unc-13 homolog A	Plasma Membrane	other
UPF1	UPF1 RNA helicase and ATPase	Nucleus	enzyme
UBTF	upstream binding transcription factor	Nucleus	transcription regulator
UROD	uroporphyrinogen decarboxylase	Cytoplasm	enzyme
VCPIP1	valosin containing protein interacting protein 1	Cytoplasm	peptidase
VAMP3	vesicle associated membrane protein 3	Plasma Membrane	other
VGF	VGF nerve growth factor inducible	Extracellular Space	growth factor
VCL	vinculin	Plasma Membrane	enzyme
VDAC2	voltage dependent anion channel 2	Cytoplasm	ion channel
VWF	von Willebrand factor	Extracellular Space	other
VPS26A	VPS26, retromer complex component A	Cytoplasm	transporter
VPS28	VPS28 subunit of ESCRT-I	Cytoplasm	transporter
VPS35	VPS35 retromer complex component	Cytoplasm	transporter
VPS37B	VPS37B subunit of ESCRT-I	Cytoplasm	other
WASF3	WASP family member 3	Cytoplasm	other
WDR1	WD repeat domain 1	Extracellular Space	other
WDR45	WD repeat domain 45	Cytoplasm	other
WDR7	WD repeat domain 7	Cytoplasm	other
WIPI2	WD repeat domain, phosphoinositide interacting 2	Cytoplasm	other
WNK2	WNK lysine deficient protein kinase 2	Cytoplasm	kinase
WBP11	WW domain binding protein 11	Nucleus	phosphatase
XIAP	X-linked inhibitor of apoptosis	Cytoplasm	enzyme
YIPF3	Yip1 domain family member 3	Cytoplasm	other
ZBED5	zinc finger BED-type containing 5	Nucleus	transcription regulator
ZMAT2	zinc finger matrin-type 2	Nucleus	other
ZNF638	zinc finger protein 638	Nucleus	other
