# Supplementary material for: Activity-Induced Cortical Glutamatergic Neuron Nascent Proteins
Source: J Neurosci. 2022 Oct 19;42(42):7900–20. doi: 10.1523/JNEUROSCI.0707-22.2022 (PMC9617616; doi:10.1523/JNEUROSCI.0707-22.2022)
Supplement: Figure 8-3 — Data for Figure 8B. SynGO analysis of all NSPs. Tables list Gene input list, gene hgnc id, gene symbol, gene name, gene synonyms, GO term ID, GO term name, GO domain, and SynGO annotation ID. Download Figure 8-3, XLSX file. [file ns-JN-RM-0707-22-s13.xlsx]

## Sheet: Fig 8B SynGO_All NSPs
PTZvsControl_All	gene hgnc_id	gene symbol	gene name	gene synonyms	GO term ID	GO term name	GO domain	SynGO annotation ID
VAPA	HGNC:12648	VAPA	VAMP associated protein A	hVAP-33, VAP-A	GO:0099569	presynaptic cytoskeleton (GO:0099569)	CC	22
NPTN	HGNC:17867	NPTN	neuroplastin	SDR1, GP55, GP65, np65, np55	GO:0097060	synaptic membrane (GO:0097060)	CC	31
NAPA	HGNC:7641	NAPA	NSF attachment protein alpha		GO:0016082	synaptic vesicle priming (GO:0016082)	BP	35
NAPA	HGNC:7641	NAPA	NSF attachment protein alpha		GO:0048787	presynaptic active zone membrane (GO:0048787)	CC	36
SNAP23	HGNC:11131	SNAP23	synaptosome associated protein 23	SNAP23A, SNAP23B, HsT17016	GO:0098794	postsynapse (GO:0098794)	CC	37
SNAP25	HGNC:11132	SNAP25	synaptosome associated protein 25	SNAP-25, RIC-4, RIC4, SEC9, bA416N4.2, dJ1068F16.2	GO:0098888	extrinsic component of presynaptic membrane (GO:0098888)	CC	38
SNAP25	HGNC:11132	SNAP25	synaptosome associated protein 25	SNAP-25, RIC-4, RIC4, SEC9, bA416N4.2, dJ1068F16.2	GO:0016079	synaptic vesicle exocytosis (GO:0016079)	BP	39
RAB3A	HGNC:9777	RAB3A	RAB3A, member RAS oncogene family		GO:0031630	regulation of synaptic vesicle fusion to presynaptic active zone membrane (GO:0031630)	BP	50
PRKCG	HGNC:9402	PRKCG	protein kinase C gamma	PKCC, MGC57564, PKCγ	GO:0099523	presynaptic cytosol (GO:0099523)	CC	66
PRKCG	HGNC:9402	PRKCG	protein kinase C gamma	PKCC, MGC57564, PKCγ	GO:2000300	regulation of synaptic vesicle exocytosis (GO:2000300)	BP	67
PRKCA	HGNC:9393	PRKCA	protein kinase C alpha	PKCα	GO:0099523	presynaptic cytosol (GO:0099523)	CC	68
PRKCB	HGNC:9395	PRKCB	protein kinase C beta	PKCβ	GO:0099523	presynaptic cytosol (GO:0099523)	CC	69
PRKCA	HGNC:9393	PRKCA	protein kinase C alpha	PKCα	GO:2000300	regulation of synaptic vesicle exocytosis (GO:2000300)	BP	70
PRKCB	HGNC:9395	PRKCB	protein kinase C beta	PKCβ	GO:2000300	regulation of synaptic vesicle exocytosis (GO:2000300)	BP	71
CDK5	HGNC:1774	CDK5	cyclin dependent kinase 5	PSSALRE	GO:0099509	regulation of presynaptic cytosolic calcium levels (GO:0099509)	BP	80
STXBP1	HGNC:11444	STXBP1	syntaxin binding protein 1	hUNC18, MUNC18-1, UNC18, rbSec1	GO:0016082	synaptic vesicle priming (GO:0016082)	BP	82
ATP2B2	HGNC:815	ATP2B2	ATPase plasma membrane Ca2+ transporting 2	PMCA2	GO:0099061	integral component of postsynaptic density membrane (GO:0099061)	CC	85
ATP2B2	HGNC:815	ATP2B2	ATPase plasma membrane Ca2+ transporting 2	PMCA2	GO:0099055	integral component of postsynaptic membrane (GO:0099055)	CC	86
ATP2B3	HGNC:816	ATP2B3	ATPase plasma membrane Ca2+ transporting 3	PMCA3, CFAP39	GO:0099056	integral component of presynaptic membrane (GO:0099056)	CC	87
BSN	HGNC:1117	BSN	bassoon presynaptic cytomatrix protein		GO:0098831	presynaptic active zone cytoplasmic component (GO:0098831)	CC	92
BSN	HGNC:1117	BSN	bassoon presynaptic cytomatrix protein		GO:0098831	presynaptic active zone cytoplasmic component (GO:0098831)	CC	94
PCLO	HGNC:13406	PCLO	piccolo presynaptic cytomatrix protein	KIAA0559, DKFZp779G1236, ACZ	GO:0098831	presynaptic active zone cytoplasmic component (GO:0098831)	CC	102
PCLO	HGNC:13406	PCLO	piccolo presynaptic cytomatrix protein	KIAA0559, DKFZp779G1236, ACZ	GO:0098882	structural constituent of active zone (GO:0098882)	BP	103
CABP1	HGNC:1384	CABP1	calcium binding protein 1		GO:0099092	postsynaptic density, intracellular component (GO:0099092)	CC	108
BSN	HGNC:1117	BSN	bassoon presynaptic cytomatrix protein		GO:0098831	presynaptic active zone cytoplasmic component (GO:0098831)	CC	121
BSN	HGNC:1117	BSN	bassoon presynaptic cytomatrix protein		GO:0098882	structural constituent of active zone (GO:0098882)	BP	122
BSN	HGNC:1117	BSN	bassoon presynaptic cytomatrix protein		GO:0098693	regulation of synaptic vesicle cycle (GO:0098693)	BP	124
RAB5A	HGNC:9783	RAB5A	RAB5A, member RAS oncogene family		GO:0098993	anchored component of synaptic vesicle membrane (GO:0098993)	CC	126
RAB11B	HGNC:9761	RAB11B	RAB11B, member RAS oncogene family	H-YPT3	GO:0098993	anchored component of synaptic vesicle membrane (GO:0098993)	CC	138
ARHGEF9	HGNC:14561	ARHGEF9	Cdc42 guanine nucleotide exchange factor 9	KIAA0424, PEM-2	GO:0099572	postsynaptic specialization (GO:0099572)	CC	155
ARHGEF9	HGNC:14561	ARHGEF9	Cdc42 guanine nucleotide exchange factor 9	KIAA0424, PEM-2	GO:0099150	regulation of postsynaptic specialization assembly (GO:0099150)	BP	156
ITPR1	HGNC:6180	ITPR1	inositol 1,4,5-trisphosphate receptor type 1	Insp3r1, IP3R1, ACV, PPP1R94	GO:0098695	inositol 1,4,5-trisphosphate receptor activity involved in regulation of postsynaptic cytosolic calcium levels (GO:0098695)	BP	159
ITPR1	HGNC:6180	ITPR1	inositol 1,4,5-trisphosphate receptor type 1	Insp3r1, IP3R1, ACV, PPP1R94	SYNGO:postsyn_ser_membrane_integral	integral component of postsynaptic SER membrane	CC	160
ITPR1	HGNC:6180	ITPR1	inositol 1,4,5-trisphosphate receptor type 1	Insp3r1, IP3R1, ACV, PPP1R94	SYNGO:presyn_ser_membrane_integral	integral component of presynaptic SER membrane	CC	161
SV2A	HGNC:20566	SV2A	synaptic vesicle glycoprotein 2A	SV2, KIAA0736	GO:0016082	synaptic vesicle priming (GO:0016082)	BP	162
RAB14	HGNC:16524	RAB14	RAB14, member RAS oncogene family	FBP, RAB-14	GO:0098993	anchored component of synaptic vesicle membrane (GO:0098993)	CC	196
FLOT1	HGNC:3757	FLOT1	flotillin 1		GO:0045202	synapse (GO:0045202)	CC	201
FLOT1	HGNC:3757	FLOT1	flotillin 1		GO:0051580	regulation of neurotransmitter uptake (GO:0051580)	BP	202
SNX1	HGNC:11172	SNX1	sorting nexin 1	SNX1A, MGC8664, HsT17379, Vps5	GO:0098999	extrinsic component of postsynaptic endosome membrane (GO:0098999)	CC	203
RAB7A	HGNC:9788	RAB7A	RAB7A, member RAS oncogene family		GO:0098993	anchored component of synaptic vesicle membrane (GO:0098993)	CC	204
ARL8B	HGNC:25564	ARL8B	ADP ribosylation factor like GTPase 8B	FLJ10702, Gie1	GO:1903742	regulation of anterograde synaptic vesicle transport (GO:1903742)	BP	209
GRM5	HGNC:4597	GRM5	glutamate metabotropic receptor 5	MGLUR5, GPRC1E, mGlu5, PPP1R86	GO:0099055	integral component of postsynaptic membrane (GO:0099055)	CC	217
FLNA	HGNC:3754	FLNA	filamin A	ABP-280	GO:0098794	postsynapse (GO:0098794)	CC	218
GRIPAP1	HGNC:18706	GRIPAP1	GRIP1 associated protein 1	GRASP-1, GRASP1, KIAA1167, MPMGp800B12492Q3, DKFZp434P0630	GO:0098998	extrinsic component of postsynaptic early endosome membrane (GO:0098998)	CC	228
DBN1	HGNC:2695	DBN1	drebrin 1		GO:0098871	postsynaptic actin cytoskeleton (GO:0098871)	CC	229
CADM1	HGNC:5951	CADM1	cell adhesion molecule 1	NECL2, ST17, BL2, SYNCAM, IGSF4A, Necl-2, SYNCAM1, RA175	GO:0098880	maintenance of postsynaptic specialization structure (GO:0098880)	BP	230
CADM1	HGNC:5951	CADM1	cell adhesion molecule 1	NECL2, ST17, BL2, SYNCAM, IGSF4A, Necl-2, SYNCAM1, RA175	GO:0099055	integral component of postsynaptic membrane (GO:0099055)	CC	231
CASK	HGNC:1497	CASK	calcium/calmodulin dependent serine protein kinase	LIN2, CAGH39, FGS4	GO:0098793	presynapse (GO:0098793)	CC	232
CASK	HGNC:1497	CASK	calcium/calmodulin dependent serine protein kinase	LIN2, CAGH39, FGS4	GO:2000300	regulation of synaptic vesicle exocytosis (GO:2000300)	BP	233
NPTX2	HGNC:7953	NPTX2	neuronal pentraxin 2		GO:0098892	extrinsic component of postsynaptic specialization membrane (GO:0098892)	CC	234
CADM3	HGNC:17601	CADM3	cell adhesion molecule 3	BIgR, FLJ10698, TSLL1, NECL1, SynCAM3, Necl-1	GO:0099056	integral component of presynaptic membrane (GO:0099056)	CC	236
MADD	HGNC:6766	MADD	MAP kinase activating death domain	DENN, KIAA0358, RAB3GEP	GO:0048490	anterograde synaptic vesicle transport (GO:0048490)	BP	247
PRKCG	HGNC:9402	PRKCG	protein kinase C gamma	PKCC, MGC57564, PKCγ	GO:0099524	postsynaptic cytosol (GO:0099524)	CC	253
PPP3R1	HGNC:9317	PPP3R1	protein phosphatase 3 regulatory subunit B, alpha	CALNB1, CNB, CNB1	GO:0099149	regulation of postsynaptic neurotransmitter receptor endocytosis (GO:0099149)	BP	255
EPHA4	HGNC:3388	EPHA4	EPH receptor A4	Hek8	GO:0099056	integral component of presynaptic membrane (GO:0099056)	CC	258
EPHA4	HGNC:3388	EPHA4	EPH receptor A4	Hek8	GO:0099055	integral component of postsynaptic membrane (GO:0099055)	CC	259
SYNPO	HGNC:30672	SYNPO	synaptopodin	KIAA1029	GO:0097444	spine apparatus (GO:0097444)	CC	264
VAMP2	HGNC:12643	VAMP2	vesicle associated membrane protein 2	VAMP-2	GO:0016081	synaptic vesicle docking (GO:0016081)	BP	265
SYNPO	HGNC:30672	SYNPO	synaptopodin	KIAA1029	GO:0099170	postsynaptic modulation of chemical synaptic transmission (GO:0099170)	BP	266
SYNPO	HGNC:30672	SYNPO	synaptopodin	KIAA1029	GO:0099566	regulation of postsynaptic cytosolic calcium levels (GO:0099566)	BP	267
CRKL	HGNC:2363	CRKL	CRK like proto-oncogene, adaptor protein		GO:0098890	extrinsic component of postsynaptic membrane (GO:0098890)	CC	268
CRKL	HGNC:2363	CRKL	CRK like proto-oncogene, adaptor protein		GO:0098698	postsynaptic specialization assembly (GO:0098698)	BP	269
NSF	HGNC:8016	NSF	N-ethylmaleimide sensitive factor, vesicle fusing ATPase	SKD2, SEC18	GO:0099523	presynaptic cytosol (GO:0099523)	CC	272
SNAP25	HGNC:11132	SNAP25	synaptosome associated protein 25	SNAP-25, RIC-4, RIC4, SEC9, bA416N4.2, dJ1068F16.2	GO:0099026	anchored component of presynaptic membrane (GO:0099026)	CC	274
SNAP25	HGNC:11132	SNAP25	synaptosome associated protein 25	SNAP-25, RIC-4, RIC4, SEC9, bA416N4.2, dJ1068F16.2	GO:0016079	synaptic vesicle exocytosis (GO:0016079)	BP	275
VAMP2	HGNC:12643	VAMP2	vesicle associated membrane protein 2	VAMP-2	GO:0016079	synaptic vesicle exocytosis (GO:0016079)	BP	291
VAMP4	HGNC:12645	VAMP4	vesicle associated membrane protein 4		GO:0099067	integral component of presynaptic endosome membrane (GO:0099067)	CC	292
VAMP4	HGNC:12645	VAMP4	vesicle associated membrane protein 4		GO:1900242	regulation of synaptic vesicle endocytosis (GO:1900242)	BP	293
CANX	HGNC:1473	CANX	calnexin	CNX, IP90, P90	GO:0048488	synaptic vesicle endocytosis (GO:0048488)	BP	296
EPHA4	HGNC:3388	EPHA4	EPH receptor A4	Hek8	GO:0098883	synapse disassembly (GO:0098883)	BP	301
SCAMP1	HGNC:10563	SCAMP1	secretory carrier membrane protein 1	SCAMP37	GO:0030285	integral component of synaptic vesicle membrane (GO:0030285)	CC	303
CADM1	HGNC:5951	CADM1	cell adhesion molecule 1	NECL2, ST17, BL2, SYNCAM, IGSF4A, Necl-2, SYNCAM1, RA175	GO:0099056	integral component of presynaptic membrane (GO:0099056)	CC	310
NPTXR	HGNC:7954	NPTXR	neuronal pentraxin receptor		GO:0099150	regulation of postsynaptic specialization assembly (GO:0099150)	BP	311
NPTX2	HGNC:7953	NPTX2	neuronal pentraxin 2		GO:0099645	neurotransmitter receptor localization to postsynaptic specialization membrane (GO:0099645)	BP	312
PCLO	HGNC:13406	PCLO	piccolo presynaptic cytomatrix protein	KIAA0559, DKFZp779G1236, ACZ	GO:0098831	presynaptic active zone cytoplasmic component (GO:0098831)	CC	313
SCAMP5	HGNC:30386	SCAMP5	secretory carrier membrane protein 5	MGC24969	GO:1900242	regulation of synaptic vesicle endocytosis (GO:1900242)	BP	316
SYN1	HGNC:11494	SYN1	synapsin I		GO:0098693	regulation of synaptic vesicle cycle (GO:0098693)	BP	318
VAMP4	HGNC:12645	VAMP4	vesicle associated membrane protein 4		GO:0016189	synaptic vesicle to endosome fusion (GO:0016189)	BP	320
ERC1	HGNC:17072	ERC1	ELKS/RAB6-interacting/CAST family member 1	ELKS, KIAA1081, CAST2, MGC12974	GO:0098831	presynaptic active zone cytoplasmic component (GO:0098831)	CC	329
ERC2	HGNC:31922	ERC2	ELKS/RAB6-interacting/CAST family member 2	CAST, CAST1, KIAA0378, SPBC110, Spc110, ELKSL	GO:0098831	presynaptic active zone cytoplasmic component (GO:0098831)	CC	330
ERC1	HGNC:17072	ERC1	ELKS/RAB6-interacting/CAST family member 1	ELKS, KIAA1081, CAST2, MGC12974	GO:0016082	synaptic vesicle priming (GO:0016082)	BP	331
ERC2	HGNC:31922	ERC2	ELKS/RAB6-interacting/CAST family member 2	CAST, CAST1, KIAA0378, SPBC110, Spc110, ELKSL	GO:0016082	synaptic vesicle priming (GO:0016082)	BP	332
ERC1	HGNC:17072	ERC1	ELKS/RAB6-interacting/CAST family member 1	ELKS, KIAA1081, CAST2, MGC12974	GO:0099509	regulation of presynaptic cytosolic calcium levels (GO:0099509)	BP	333
BAIAP2	HGNC:947	BAIAP2	BAI1 associated protein 2	BAP2, IRSp53	GO:0099524	postsynaptic cytosol (GO:0099524)	CC	337
BAIAP2	HGNC:947	BAIAP2	BAI1 associated protein 2	BAP2, IRSp53	GO:0099523	presynaptic cytosol (GO:0099523)	CC	338
CACNA2D1	HGNC:1399	CACNA2D1	calcium voltage-gated channel auxiliary subunit alpha2delta 1	lncRNA-N3	GO:0099029	anchored component of presynaptic active zone membrane (GO:0099029)	CC	344
DPYSL2	HGNC:3014	DPYSL2	dihydropyrimidinase like 2	DRP-2, DHPRP2, CRMP2, DRP2	GO:0098793	presynapse (GO:0098793)	CC	347
PCLO	HGNC:13406	PCLO	piccolo presynaptic cytomatrix protein	KIAA0559, DKFZp779G1236, ACZ	GO:0097091	synaptic vesicle clustering (GO:0097091)	BP	356
CACNB1	HGNC:1401	CACNB1	calcium voltage-gated channel auxiliary subunit beta 1		GO:0098793	presynapse (GO:0098793)	CC	363
GPHN	HGNC:15465	GPHN	gephyrin	KIAA1385	GO:0099091	postsynaptic specialization, intracellular component (GO:0099091)	CC	367
GPHN	HGNC:15465	GPHN	gephyrin	KIAA1385	GO:0099091	postsynaptic specialization, intracellular component (GO:0099091)	CC	368
GPHN	HGNC:15465	GPHN	gephyrin	KIAA1385	GO:0099645	neurotransmitter receptor localization to postsynaptic specialization membrane (GO:0099645)	BP	369
GPHN	HGNC:15465	GPHN	gephyrin	KIAA1385	GO:0099645	neurotransmitter receptor localization to postsynaptic specialization membrane (GO:0099645)	BP	371
CTBP1	HGNC:2494	CTBP1	C-terminal binding protein 1	BARS	GO:0098831	presynaptic active zone cytoplasmic component (GO:0098831)	CC	373
ATP1A3	HGNC:801	ATP1A3	ATPase Na+/K+ transporting subunit alpha 3		GO:0099056	integral component of presynaptic membrane (GO:0099056)	CC	389
ERC1	HGNC:17072	ERC1	ELKS/RAB6-interacting/CAST family member 1	ELKS, KIAA1081, CAST2, MGC12974	GO:0098882	structural constituent of active zone (GO:0098882)	BP	402
ERC2	HGNC:31922	ERC2	ELKS/RAB6-interacting/CAST family member 2	CAST, CAST1, KIAA0378, SPBC110, Spc110, ELKSL	GO:0098882	structural constituent of active zone (GO:0098882)	BP	403
APOE	HGNC:613	APOE	apolipoprotein E		GO:0043083	synaptic cleft (GO:0043083)	CC	405
ACTB	HGNC:132	ACTB	actin beta		GO:1900242	regulation of synaptic vesicle endocytosis (GO:1900242)	BP	409
BSN	HGNC:1117	BSN	bassoon presynaptic cytomatrix protein		GO:0098882	structural constituent of active zone (GO:0098882)	BP	410
ACTG1	HGNC:144	ACTG1	actin gamma 1		GO:0099143	presynaptic actin cytoskeleton (GO:0099143)	CC	419
CDKL5	HGNC:11411	CDKL5	cyclin dependent kinase like 5	EIEE2, CFAP247	GO:0099092	postsynaptic density, intracellular component (GO:0099092)	CC	420
CPEB3	HGNC:21746	CPEB3	cytoplasmic polyadenylation element binding protein 3	KIAA0940	GO:0098794	postsynapse (GO:0098794)	CC	431
FXR2	HGNC:4024	FXR2	FMR1 autosomal homolog 2		GO:0098794	postsynapse (GO:0098794)	CC	434
CYFIP1	HGNC:13759	CYFIP1	cytoplasmic FMR1 interacting protein 1	KIAA0068, P140SRA-1, SHYC	GO:0098794	postsynapse (GO:0098794)	CC	435
PRKAR2B	HGNC:9392	PRKAR2B	protein kinase cAMP-dependent type II regulatory subunit beta		GO:0098794	postsynapse (GO:0098794)	CC	436
PRKAR1B	HGNC:9390	PRKAR1B	protein kinase cAMP-dependent type I regulatory subunit beta		GO:0050804	modulation of chemical synaptic transmission (GO:0050804)	BP	437
PRKAR1B	HGNC:9390	PRKAR1B	protein kinase cAMP-dependent type I regulatory subunit beta		GO:0098693	regulation of synaptic vesicle cycle (GO:0098693)	BP	438
PRKAR1B	HGNC:9390	PRKAR1B	protein kinase cAMP-dependent type I regulatory subunit beta		GO:0050804	modulation of chemical synaptic transmission (GO:0050804)	BP	439
PRKAR2A	HGNC:9391	PRKAR2A	protein kinase cAMP-dependent type II regulatory subunit alpha		GO:0050804	modulation of chemical synaptic transmission (GO:0050804)	BP	440
PRKAR2B	HGNC:9392	PRKAR2B	protein kinase cAMP-dependent type II regulatory subunit beta		GO:0050804	modulation of chemical synaptic transmission (GO:0050804)	BP	441
CYFIP1	HGNC:13759	CYFIP1	cytoplasmic FMR1 interacting protein 1	KIAA0068, P140SRA-1, SHYC	GO:1905274	regulation of modification of postsynaptic actin cytoskeleton (GO:1905274)	BP	461
CACNA2D1	HGNC:1399	CACNA2D1	calcium voltage-gated channel auxiliary subunit alpha2delta 1	lncRNA-N3	GO:0099025	anchored component of postsynaptic membrane (GO:0099025)	CC	464
ELAVL1	HGNC:3312	ELAVL1	ELAV like RNA binding protein 1	HuR, Hua, MelG	GO:0098794	postsynapse (GO:0098794)	CC	466
DMXL2	HGNC:2938	DMXL2	Dmx like 2	RC3, KIAA0856, DFNA71	GO:0008021	synaptic vesicle (GO:0008021)	CC	477
DMXL2	HGNC:2938	DMXL2	Dmx like 2	RC3, KIAA0856, DFNA71	GO:0098992	neuronal dense core vesicle (GO:0098992)	CC	478
NCKAP1	HGNC:7666	NCKAP1	NCK associated protein 1	Nap1, HEM2, NAP125	GO:0098794	postsynapse (GO:0098794)	CC	480
NCKAP1	HGNC:7666	NCKAP1	NCK associated protein 1	Nap1, HEM2, NAP125	GO:0050807	regulation of synapse organization (GO:0050807)	BP	482
VCP	HGNC:12666	VCP	valosin containing protein	IBMPFD, p97, CDC48, TERA	GO:0050807	regulation of synapse organization (GO:0050807)	BP	484
CADPS	HGNC:1426	CADPS	calcium dependent secretion activator	CAPS, KIAA1121, CAPS1, UNC-31	GO:0098793	presynapse (GO:0098793)	CC	491
MECP2	HGNC:6990	MECP2	methyl-CpG binding protein 2		GO:0050807	regulation of synapse organization (GO:0050807)	BP	492
CADPS	HGNC:1426	CADPS	calcium dependent secretion activator	CAPS, KIAA1121, CAPS1, UNC-31	GO:0099525	presynaptic dense core vesicle exocytosis (GO:0099525)	BP	493
CADPS	HGNC:1426	CADPS	calcium dependent secretion activator	CAPS, KIAA1121, CAPS1, UNC-31	GO:0016082	synaptic vesicle priming (GO:0016082)	BP	494
ARF6	HGNC:659	ARF6	ADP ribosylation factor 6		GO:0048488	synaptic vesicle endocytosis (GO:0048488)	BP	496
PAK1	HGNC:8590	PAK1	p21 (RAC1) activated kinase 1		GO:0014069	postsynaptic density (GO:0014069)	CC	500
PAK2	HGNC:8591	PAK2	p21 (RAC1) activated kinase 2	PAK65, PAKgamma	GO:0014069	postsynaptic density (GO:0014069)	CC	501
PAK3	HGNC:8592	PAK3	p21 (RAC1) activated kinase 3	hPAK3, bPAK	GO:0014069	postsynaptic density (GO:0014069)	CC	502
FXR1	HGNC:4023	FXR1	FMR1 autosomal homolog 1		GO:0098794	postsynapse (GO:0098794)	CC	503
SYNGAP1	HGNC:11497	SYNGAP1	synaptic Ras GTPase activating protein 1	SYNGAP, RASA5, KIAA1938	GO:0099092	postsynaptic density, intracellular component (GO:0099092)	CC	519
SHANK2	HGNC:14295	SHANK2	SH3 and multiple ankyrin repeat domains 2	CTTNBP1, ProSAP1, SHANK, SPANK-3	GO:0014069	postsynaptic density (GO:0014069)	CC	522
PIN1	HGNC:8988	PIN1	peptidylprolyl cis/trans isomerase, NIMA-interacting 1	dod	GO:0099524	postsynaptic cytosol (GO:0099524)	CC	527
SCN2A	HGNC:10588	SCN2A	sodium voltage-gated channel alpha subunit 2	Nav1.2, HBSCII, HBSCI	GO:0099056	integral component of presynaptic membrane (GO:0099056)	CC	531
BAIAP2	HGNC:947	BAIAP2	BAI1 associated protein 2	BAP2, IRSp53	GO:0099092	postsynaptic density, intracellular component (GO:0099092)	CC	549
BAIAP2	HGNC:947	BAIAP2	BAI1 associated protein 2	BAP2, IRSp53	GO:0050804	modulation of chemical synaptic transmission (GO:0050804)	BP	550
UNC13A	HGNC:23150	UNC13A	unc-13 homolog A	KIAA1032, Munc13-1	GO:0048786	presynaptic active zone (GO:0048786)	CC	555
CADPS	HGNC:1426	CADPS	calcium dependent secretion activator	CAPS, KIAA1121, CAPS1, UNC-31	GO:0098674	extrinsic component of neuronal dense core vesicle membrane (GO:0098674)	CC	557
UNC13A	HGNC:23150	UNC13A	unc-13 homolog A	KIAA1032, Munc13-1	GO:0016079	synaptic vesicle exocytosis (GO:0016079)	BP	559
SLC17A7	HGNC:16704	SLC17A7	solute carrier family 17 member 7	BNPI, VGLUT1	GO:0098700	synaptic vesicle neurotransmitter loading (GO:0098700)	BP	564
WASF3	HGNC:12734	WASF3	WAS protein family member 3	WAVE3, SCAR3, KIAA0900	GO:0098794	postsynapse (GO:0098794)	CC	568
WASF1	HGNC:12732	WASF1	WAS protein family member 1	WAVE1, SCAR1, KIAA0269, WAVE	GO:0098939	dendritic transport of mitochondrion (GO:0098939)	BP	570
WASF1	HGNC:12732	WASF1	WAS protein family member 1	WAVE1, SCAR1, KIAA0269, WAVE	GO:0098885	modification of postsynaptic actin cytoskeleton (GO:0098885)	BP	571
CPLX1	HGNC:2309	CPLX1	complexin 1	CPX-I	GO:0031630	regulation of synaptic vesicle fusion to presynaptic active zone membrane (GO:0031630)	BP	575
CPLX2	HGNC:2310	CPLX2	complexin 2	CPX-2, DKFZp547D155	GO:0031630	regulation of synaptic vesicle fusion to presynaptic active zone membrane (GO:0031630)	BP	576
CPLX1	HGNC:2309	CPLX1	complexin 1	CPX-I	GO:0099145	regulation of exocytic insertion of neurotransmitter receptor to postsynaptic membrane (GO:0099145)	BP	578
CPLX1	HGNC:2309	CPLX1	complexin 1	CPX-I	GO:0098794	postsynapse (GO:0098794)	CC	579
CPLX2	HGNC:2310	CPLX2	complexin 2	CPX-2, DKFZp547D155	GO:0098793	presynapse (GO:0098793)	CC	580
CPLX1	HGNC:2309	CPLX1	complexin 1	CPX-I	GO:0098793	presynapse (GO:0098793)	CC	581
CPLX2	HGNC:2310	CPLX2	complexin 2	CPX-2, DKFZp547D155	GO:0098793	presynapse (GO:0098793)	CC	582
CPLX1	HGNC:2309	CPLX1	complexin 1	CPX-I	GO:0098794	postsynapse (GO:0098794)	CC	583
CPLX1	HGNC:2309	CPLX1	complexin 1	CPX-I	GO:0098793	presynapse (GO:0098793)	CC	584
CPLX2	HGNC:2310	CPLX2	complexin 2	CPX-2, DKFZp547D155	GO:0098794	postsynapse (GO:0098794)	CC	585
SCAMP5	HGNC:30386	SCAMP5	secretory carrier membrane protein 5	MGC24969	GO:1900242	regulation of synaptic vesicle endocytosis (GO:1900242)	BP	586
BCAN	HGNC:23059	BCAN	brevican	BEHAB, MGC13038, CSPG7	GO:0098966	perisynaptic extracellular matrix (GO:0098966)	CC	641
AMPH	HGNC:471	AMPH	amphiphysin		GO:0098850	extrinsic component of synaptic vesicle membrane (GO:0098850)	CC	645
CPEB2	HGNC:21745	CPEB2	cytoplasmic polyadenylation element binding protein 2		GO:0098793	presynapse (GO:0098793)	CC	655
CLTC	HGNC:2092	CLTC	clathrin heavy chain	Hc	GO:0048488	synaptic vesicle endocytosis (GO:0048488)	BP	657
CPEB2	HGNC:21745	CPEB2	cytoplasmic polyadenylation element binding protein 2		GO:0098794	postsynapse (GO:0098794)	CC	658
SLC6A17	HGNC:31399	SLC6A17	solute carrier family 6 member 17		GO:0030285	integral component of synaptic vesicle membrane (GO:0030285)	CC	660
CLTC	HGNC:2092	CLTC	clathrin heavy chain	Hc	GO:0098835	presynaptic endocytic zone membrane (GO:0098835)	CC	665
SH3GL2	HGNC:10831	SH3GL2	SH3 domain containing GRB2 like 2, endophilin A1	SH3P4, SH3D2A, CNSA2, EEN-B1	GO:0048488	synaptic vesicle endocytosis (GO:0048488)	BP	666
DNM1	HGNC:2972	DNM1	dynamin 1		GO:0048488	synaptic vesicle endocytosis (GO:0048488)	BP	670
DNM3	HGNC:29125	DNM3	dynamin 3	KIAA0820	GO:0048488	synaptic vesicle endocytosis (GO:0048488)	BP	676
KPNA1	HGNC:6394	KPNA1	karyopherin subunit alpha 1	SRP1, RCH2, NPI-1, IPOA5	GO:0014069	postsynaptic density (GO:0014069)	CC	684
AKAP12	HGNC:370	AKAP12	A-kinase anchoring protein 12	AKAP250, SSeCKS	GO:0050804	modulation of chemical synaptic transmission (GO:0050804)	BP	686
PIN1	HGNC:8988	PIN1	peptidylprolyl cis/trans isomerase, NIMA-interacting 1	dod	SYNGO:catabolic_postsynapse_regulation	regulation of protein catabolic process at postsynapse	BP	697
SYNJ1	HGNC:11503	SYNJ1	synaptojanin 1	INPP5G, PARK20	GO:0016191	synaptic vesicle uncoating (GO:0016191)	BP	701
SNAP91	HGNC:14986	SNAP91	synaptosome associated protein 91	KIAA0656, AP180, CALM	GO:0048488	synaptic vesicle endocytosis (GO:0048488)	BP	702
PICALM	HGNC:15514	PICALM	phosphatidylinositol binding clathrin assembly protein	CALM, CLTH	GO:0048488	synaptic vesicle endocytosis (GO:0048488)	BP	704
AMPH	HGNC:471	AMPH	amphiphysin		GO:0048488	synaptic vesicle endocytosis (GO:0048488)	BP	705
SYNJ1	HGNC:11503	SYNJ1	synaptojanin 1	INPP5G, PARK20	GO:0098793	presynapse (GO:0098793)	CC	706
NCS1	HGNC:3953	NCS1	neuronal calcium sensor 1	NCS-1	GO:0099523	presynaptic cytosol (GO:0099523)	CC	707
NCS1	HGNC:3953	NCS1	neuronal calcium sensor 1	NCS-1	GO:0099524	postsynaptic cytosol (GO:0099524)	CC	708
NCS1	HGNC:3953	NCS1	neuronal calcium sensor 1	NCS-1	GO:0098794	postsynapse (GO:0098794)	CC	709
NAPA	HGNC:7641	NAPA	NSF attachment protein alpha		GO:0010807	regulation of synaptic vesicle priming (GO:0010807)	BP	716
NAPB	HGNC:15751	NAPB	NSF attachment protein beta	SNAP-BETA, SNAPB	GO:0010807	regulation of synaptic vesicle priming (GO:0010807)	BP	717
NAPA	HGNC:7641	NAPA	NSF attachment protein alpha		GO:0098793	presynapse (GO:0098793)	CC	718
NAPB	HGNC:15751	NAPB	NSF attachment protein beta	SNAP-BETA, SNAPB	GO:0098793	presynapse (GO:0098793)	CC	719
NAPB	HGNC:15751	NAPB	NSF attachment protein beta	SNAP-BETA, SNAPB	GO:0098794	postsynapse (GO:0098794)	CC	726
NAPA	HGNC:7641	NAPA	NSF attachment protein alpha		GO:0098794	postsynapse (GO:0098794)	CC	727
PIP5K1C	HGNC:8996	PIP5K1C	phosphatidylinositol-4-phosphate 5-kinase type 1 gamma	PIP5Kgamma, KIAA0589, LCCS3	GO:1900242	regulation of synaptic vesicle endocytosis (GO:1900242)	BP	733
PIP5K1C	HGNC:8996	PIP5K1C	phosphatidylinositol-4-phosphate 5-kinase type 1 gamma	PIP5Kgamma, KIAA0589, LCCS3	GO:0098835	presynaptic endocytic zone membrane (GO:0098835)	CC	734
PACSIN1	HGNC:8570	PACSIN1	protein kinase C and casein kinase substrate in neurons 1	SDPI	GO:0048488	synaptic vesicle endocytosis (GO:0048488)	BP	735
CRTC1	HGNC:16062	CRTC1	CREB regulated transcription coactivator 1	KIAA0616, FLJ14027, TORC1	GO:0014069	postsynaptic density (GO:0014069)	CC	758
SLC6A1	HGNC:11042	SLC6A1	solute carrier family 6 member 1	GAT1, GABATR, GABATHG	GO:0098810	neurotransmitter reuptake (GO:0098810)	BP	762
SLC6A1	HGNC:11042	SLC6A1	solute carrier family 6 member 1	GAT1, GABATR, GABATHG	GO:0099056	integral component of presynaptic membrane (GO:0099056)	CC	764
SLC6A1	HGNC:11042	SLC6A1	solute carrier family 6 member 1	GAT1, GABATR, GABATHG	GO:0099055	integral component of postsynaptic membrane (GO:0099055)	CC	767
PFN2	HGNC:8882	PFN2	profilin 2		GO:0098794	postsynapse (GO:0098794)	CC	800
PFN2	HGNC:8882	PFN2	profilin 2		GO:0099171	presynaptic modulation of chemical synaptic transmission (GO:0099171)	BP	801
ACTG1	HGNC:144	ACTG1	actin gamma 1		GO:1900242	regulation of synaptic vesicle endocytosis (GO:1900242)	BP	811
ACTG1	HGNC:144	ACTG1	actin gamma 1		GO:0098871	postsynaptic actin cytoskeleton (GO:0098871)	CC	815
ACTG1	HGNC:144	ACTG1	actin gamma 1		GO:0098973	structural constituent of postsynaptic actin cytoskeleton (GO:0098973)	BP	816
ACTG1	HGNC:144	ACTG1	actin gamma 1		GO:0098973	structural constituent of postsynaptic actin cytoskeleton (GO:0098973)	BP	818
PFN2	HGNC:8882	PFN2	profilin 2		GO:0098793	presynapse (GO:0098793)	CC	822
STAT3	HGNC:11364	STAT3	signal transducer and activator of transcription 3	APRF	GO:0014069	postsynaptic density (GO:0014069)	CC	838
SLC8A1	HGNC:11068	SLC8A1	solute carrier family 8 member A1		GO:0099055	integral component of postsynaptic membrane (GO:0099055)	CC	841
SLC8A2	HGNC:11069	SLC8A2	solute carrier family 8 member A2	NCX2, KIAA1087	GO:0099055	integral component of postsynaptic membrane (GO:0099055)	CC	842
PTPRS	HGNC:9681	PTPRS	protein tyrosine phosphatase, receptor type S		GO:0099056	integral component of presynaptic membrane (GO:0099056)	CC	844
NPTXR	HGNC:7954	NPTXR	neuronal pentraxin receptor		GO:0099645	neurotransmitter receptor localization to postsynaptic specialization membrane (GO:0099645)	BP	849
APBA2	HGNC:579	APBA2	amyloid beta precursor protein binding family A member 2	D15S1518E, LIN-10, MGC:14091, HsT16821	GO:0099171	presynaptic modulation of chemical synaptic transmission (GO:0099171)	BP	871
APBB1	HGNC:581	APBB1	amyloid beta precursor protein binding family B member 1	Fe65	GO:0098793	presynapse (GO:0098793)	CC	880
CALB1	HGNC:1434	CALB1	calbindin 1		GO:0099524	postsynaptic cytosol (GO:0099524)	CC	883
CALB1	HGNC:1434	CALB1	calbindin 1		GO:0099523	presynaptic cytosol (GO:0099523)	CC	884
CALB1	HGNC:1434	CALB1	calbindin 1		GO:0099534	calcium ion binding involved in regulation of presynaptic cytosolic calcium levels (GO:0099534)	BP	885
CAMK2A	HGNC:1460	CAMK2A	calcium/calmodulin dependent protein kinase II alpha	KIAA0968, CaMKIINalpha	GO:0099523	presynaptic cytosol (GO:0099523)	CC	886
CAMK2A	HGNC:1460	CAMK2A	calcium/calmodulin dependent protein kinase II alpha	KIAA0968, CaMKIINalpha	GO:0099524	postsynaptic cytosol (GO:0099524)	CC	887
CAMK2B	HGNC:1461	CAMK2B	calcium/calmodulin dependent protein kinase II beta	CAM2, CAMK2	GO:0014069	postsynaptic density (GO:0014069)	CC	888
CAMK2A	HGNC:1460	CAMK2A	calcium/calmodulin dependent protein kinase II alpha	KIAA0968, CaMKIINalpha	GO:0014069	postsynaptic density (GO:0014069)	CC	889
PFN1	HGNC:8881	PFN1	profilin 1		GO:0098793	presynapse (GO:0098793)	CC	890
PFN1	HGNC:8881	PFN1	profilin 1		GO:0098794	postsynapse (GO:0098794)	CC	891
CHMP2B	HGNC:24537	CHMP2B	charged multivesicular body protein 2B	DKFZP564O123, CHMP2.5, VPS2B	GO:0014069	postsynaptic density (GO:0014069)	CC	892
ERBIN	HGNC:15842	ERBIN	erbb2 interacting protein	LAP2	GO:0099572	postsynaptic specialization (GO:0099572)	CC	893
NRXN1	HGNC:8008	NRXN1	neurexin 1	KIAA0578, Hs.22998	GO:0099056	integral component of presynaptic membrane (GO:0099056)	CC	894
NRXN1	HGNC:8008	NRXN1	neurexin 1	KIAA0578, Hs.22998	GO:0150036	regulation of trans-synaptic signaling by endocannabinoid, modulating synaptic transmission (GO:0150036)	BP	895
NRXN3	HGNC:8010	NRXN3	neurexin 3	KIAA0743	GO:0099072	regulation of postsynaptic membrane neurotransmitter receptor levels (GO:0099072)	BP	896
NRXN3	HGNC:8010	NRXN3	neurexin 3	KIAA0743	GO:0099171	presynaptic modulation of chemical synaptic transmission (GO:0099171)	BP	897
NRXN1	HGNC:8008	NRXN1	neurexin 1	KIAA0578, Hs.22998	GO:0098693	regulation of synaptic vesicle cycle (GO:0098693)	BP	898
ATP1A3	HGNC:801	ATP1A3	ATPase Na+/K+ transporting subunit alpha 3		GO:0099056	integral component of presynaptic membrane (GO:0099056)	CC	904
ATP1A3	HGNC:801	ATP1A3	ATPase Na+/K+ transporting subunit alpha 3		GO:0098794	postsynapse (GO:0098794)	CC	905
CHMP2B	HGNC:24537	CHMP2B	charged multivesicular body protein 2B	DKFZP564O123, CHMP2.5, VPS2B	GO:0099175	regulation of postsynapse organization (GO:0099175)	BP	909
PPP1R9A	HGNC:14946	PPP1R9A	protein phosphatase 1 regulatory subunit 9A	Neurabin-I, KIAA1222, FLJ20068	GO:0098793	presynapse (GO:0098793)	CC	912
PPP1R9A	HGNC:14946	PPP1R9A	protein phosphatase 1 regulatory subunit 9A	Neurabin-I, KIAA1222, FLJ20068	GO:0014069	postsynaptic density (GO:0014069)	CC	913
PPP1R9B	HGNC:9298	PPP1R9B	protein phosphatase 1 regulatory subunit 9B	Spn, SPINO	GO:0014069	postsynaptic density (GO:0014069)	CC	914
PLCG1	HGNC:9065	PLCG1	phospholipase C gamma 1	PLC148, PLC-II, PLCgamma1, NCKAP3	GO:0050804	modulation of chemical synaptic transmission (GO:0050804)	BP	921
CTBP1	HGNC:2494	CTBP1	C-terminal binding protein 1	BARS	GO:0098831	presynaptic active zone cytoplasmic component (GO:0098831)	CC	923
CAMK4	HGNC:1464	CAMK4	calcium/calmodulin dependent protein kinase IV	CaMK-GR	GO:0098794	postsynapse (GO:0098794)	CC	924
EPS8	HGNC:3420	EPS8	epidermal growth factor receptor pathway substrate 8		GO:0014069	postsynaptic density (GO:0014069)	CC	929
EPS8	HGNC:3420	EPS8	epidermal growth factor receptor pathway substrate 8		GO:0099072	regulation of postsynaptic membrane neurotransmitter receptor levels (GO:0099072)	BP	930
PPFIA3	HGNC:9247	PPFIA3	PTPRF interacting protein alpha 3	KIAA0654, LPNA3, MGC126567, MGC126569	GO:0045202	synapse (GO:0045202)	CC	932
CNTN2	HGNC:2172	CNTN2	contactin 2	TAG-1, TAX1	GO:0099025	anchored component of postsynaptic membrane (GO:0099025)	CC	937
PLCB1	HGNC:15917	PLCB1	phospholipase C beta 1	KIAA0581, PLC-I, PLC154	GO:0099178	regulation of retrograde trans-synaptic signaling by endocanabinoid (GO:0099178)	BP	940
PLCB1	HGNC:15917	PLCB1	phospholipase C beta 1	KIAA0581, PLC-I, PLC154	GO:0099170	postsynaptic modulation of chemical synaptic transmission (GO:0099170)	BP	941
CNTN1	HGNC:2171	CNTN1	contactin 1	F3, GP135	GO:0099026	anchored component of presynaptic membrane (GO:0099026)	CC	945
CNTN1	HGNC:2171	CNTN1	contactin 1	F3, GP135	GO:0099025	anchored component of postsynaptic membrane (GO:0099025)	CC	946
CAMK2B	HGNC:1461	CAMK2B	calcium/calmodulin dependent protein kinase II beta	CAM2, CAMK2	GO:0098973	structural constituent of postsynaptic actin cytoskeleton (GO:0098973)	BP	947
FLNA	HGNC:3754	FLNA	filamin A	ABP-280	GO:0050808	synapse organization (GO:0050808)	BP	950
SDCBP	HGNC:10662	SDCBP	syndecan binding protein	SYCL, MDA-9	GO:0099054	presynapse assembly (GO:0099054)	BP	954
PENK	HGNC:8831	PENK	proenkephalin		GO:0099013	neuronal dense core vesicle lumen (GO:0099013)	CC	963
PENK	HGNC:8831	PENK	proenkephalin		GO:0034592	synaptic vesicle lumen (GO:0034592)	CC	965
CSNK2B	HGNC:2460	CSNK2B	casein kinase 2 beta	Ckb1, Ckb2	GO:0050807	regulation of synapse organization (GO:0050807)	BP	968
PPP3R1	HGNC:9317	PPP3R1	protein phosphatase 3 regulatory subunit B, alpha	CALNB1, CNB, CNB1	GO:0099170	postsynaptic modulation of chemical synaptic transmission (GO:0099170)	BP	972
ALDOC	HGNC:418	ALDOC	aldolase, fructose-bisphosphate C		GO:0099524	postsynaptic cytosol (GO:0099524)	CC	976
CAMK2A	HGNC:1460	CAMK2A	calcium/calmodulin dependent protein kinase II alpha	KIAA0968, CaMKIINalpha	GO:0099148	regulation of synaptic vesicle docking (GO:0099148)	BP	981
DYNLL2	HGNC:24596	DYNLL2	dynein light chain LC8-type 2	MGC17810, Dlc2, DNCL1B, RSPH22	GO:0014069	postsynaptic density (GO:0014069)	CC	983
MYO5A	HGNC:7602	MYO5A	myosin VA	MYO5, GS1, MYR12	GO:0098871	postsynaptic actin cytoskeleton (GO:0098871)	CC	984
MYO6	HGNC:7605	MYO6	myosin VI	KIAA0389	GO:0014069	postsynaptic density (GO:0014069)	CC	986
MYO6	HGNC:7605	MYO6	myosin VI	KIAA0389	GO:0098833	presynaptic endocytic zone (GO:0098833)	CC	991
CTNNA2	HGNC:2510	CTNNA2	catenin alpha 2	CAP-R, CT114	GO:0099092	postsynaptic density, intracellular component (GO:0099092)	CC	992
CTNNA2	HGNC:2510	CTNNA2	catenin alpha 2	CAP-R, CT114	GO:0098831	presynaptic active zone cytoplasmic component (GO:0098831)	CC	994
CTNNA2	HGNC:2510	CTNNA2	catenin alpha 2	CAP-R, CT114	GO:0098885	modification of postsynaptic actin cytoskeleton (GO:0098885)	BP	996
NEFM	HGNC:7734	NEFM	neurofilament medium	NFM, NF-M	GO:0099160	postsynaptic intermediate filament cytoskeleton (GO:0099160)	CC	997
CTNNB1	HGNC:2514	CTNNB1	catenin beta 1	beta-catenin, armadillo	GO:0099092	postsynaptic density, intracellular component (GO:0099092)	CC	999
CTNNB1	HGNC:2514	CTNNB1	catenin beta 1	beta-catenin, armadillo	GO:0098831	presynaptic active zone cytoplasmic component (GO:0098831)	CC	1000
CTNNB1	HGNC:2514	CTNNB1	catenin beta 1	beta-catenin, armadillo	GO:0097091	synaptic vesicle clustering (GO:0097091)	BP	1001
NEFM	HGNC:7734	NEFM	neurofilament medium	NFM, NF-M	GO:0099182	presynaptic intermediate filament cytoskeleton (GO:0099182)	CC	1002
SPARCL1	HGNC:11220	SPARCL1	SPARC like 1	MAST9	GO:0098965	extracellular matrix of synaptic cleft (GO:0098965)	CC	1003
SPARCL1	HGNC:11220	SPARCL1	SPARC like 1	MAST9	GO:0099560	synapse adhesion between pre- and post-synapse (GO:0099560)	BP	1004
ADGRL1	HGNC:20973	ADGRL1	adhesion G protein-coupled receptor L1	KIAA0821, CIRL1, LEC2	GO:0099056	integral component of presynaptic membrane (GO:0099056)	CC	1012
CADM1	HGNC:5951	CADM1	cell adhesion molecule 1	NECL2, ST17, BL2, SYNCAM, IGSF4A, Necl-2, SYNCAM1, RA175	GO:0099560	synapse adhesion between pre- and post-synapse (GO:0099560)	BP	1016
CADM1	HGNC:5951	CADM1	cell adhesion molecule 1	NECL2, ST17, BL2, SYNCAM, IGSF4A, Necl-2, SYNCAM1, RA175	GO:0098942	retrograde trans-synaptic signaling by trans-synaptic protein complex (GO:0098942)	BP	1019
AP2M1	HGNC:564	AP2M1	adaptor related protein complex 2 subunit mu 1	AP50, mu2	GO:0048488	synaptic vesicle endocytosis (GO:0048488)	BP	1020
PPFIA3	HGNC:9247	PPFIA3	PTPRF interacting protein alpha 3	KIAA0654, LPNA3, MGC126567, MGC126569	GO:0099054	presynapse assembly (GO:0099054)	BP	1037
FLOT1	HGNC:3757	FLOT1	flotillin 1		GO:0098793	presynapse (GO:0098793)	CC	1041
ADGRL3	HGNC:20974	ADGRL3	adhesion G protein-coupled receptor L3	KIAA0768, LEC3	GO:0050808	synapse organization (GO:0050808)	BP	1044
IQSEC2	HGNC:29059	IQSEC2	IQ motif and Sec7 domain 2	KIAA0522, BRAG1, IQ-ArfGEF	GO:0099092	postsynaptic density, intracellular component (GO:0099092)	CC	1053
IQSEC2	HGNC:29059	IQSEC2	IQ motif and Sec7 domain 2	KIAA0522, BRAG1, IQ-ArfGEF	GO:0098831	presynaptic active zone cytoplasmic component (GO:0098831)	CC	1054
IQSEC2	HGNC:29059	IQSEC2	IQ motif and Sec7 domain 2	KIAA0522, BRAG1, IQ-ArfGEF	GO:0098696	regulation of neurotransmitter receptor localization to postsynaptic specialization membrane (GO:0098696)	BP	1057
IQSEC1	HGNC:29112	IQSEC1	IQ motif and Sec7 domain 1	KIAA0763, GEP100, BRAG2, ARF-GEP100	GO:0099092	postsynaptic density, intracellular component (GO:0099092)	CC	1058
CDH2	HGNC:1759	CDH2	cadherin 2	CDHN, CD325	GO:0099055	integral component of postsynaptic membrane (GO:0099055)	CC	1059
IQSEC1	HGNC:29112	IQSEC1	IQ motif and Sec7 domain 1	KIAA0763, GEP100, BRAG2, ARF-GEP100	GO:0099149	regulation of postsynaptic neurotransmitter receptor endocytosis (GO:0099149)	BP	1060
CTNND1	HGNC:2515	CTNND1	catenin delta 1	KIAA0384, p120, p120cas, p120ctn	GO:0099072	regulation of postsynaptic membrane neurotransmitter receptor levels (GO:0099072)	BP	1067
IQSEC2	HGNC:29059	IQSEC2	IQ motif and Sec7 domain 2	KIAA0522, BRAG1, IQ-ArfGEF	GO:0050804	modulation of chemical synaptic transmission (GO:0050804)	BP	1077
STAT3	HGNC:11364	STAT3	signal transducer and activator of transcription 3	APRF	GO:0050804	modulation of chemical synaptic transmission (GO:0050804)	BP	1078
SYP	HGNC:11506	SYP	synaptophysin	MRX96	GO:2000300	regulation of synaptic vesicle exocytosis (GO:2000300)	BP	1134
SYP	HGNC:11506	SYP	synaptophysin	MRX96	GO:0030285	integral component of synaptic vesicle membrane (GO:0030285)	CC	1136
SPTBN2	HGNC:11276	SPTBN2	spectrin beta, non-erythrocytic 2		GO:0098793	presynapse (GO:0098793)	CC	1140
SYN2	HGNC:11495	SYN2	synapsin II	SYNII, SYNIIa, SYNIIb	GO:0097091	synaptic vesicle clustering (GO:0097091)	BP	1158
STX1A	HGNC:11433	STX1A	syntaxin 1A	HPC-1, p35-1	GO:0030285	integral component of synaptic vesicle membrane (GO:0030285)	CC	1162
STX1A	HGNC:11433	STX1A	syntaxin 1A	HPC-1, p35-1	GO:0099056	integral component of presynaptic membrane (GO:0099056)	CC	1163
SYNGR1	HGNC:11498	SYNGR1	synaptogyrin 1		GO:0098693	regulation of synaptic vesicle cycle (GO:0098693)	BP	1165
EPS15	HGNC:3419	EPS15	epidermal growth factor receptor pathway substrate 15	AF-1P, MLLT5	GO:0048488	synaptic vesicle endocytosis (GO:0048488)	BP	1176
STXBP3	HGNC:11446	STXBP3	syntaxin binding protein 3	UNC-18C	GO:0098793	presynapse (GO:0098793)	CC	1181
GRIPAP1	HGNC:18706	GRIPAP1	GRIP1 associated protein 1	GRASP-1, GRASP1, KIAA1167, MPMGp800B12492Q3, DKFZp434P0630	GO:0099158	regulation of recycling endosome localization within postsynapse (GO:0099158)	BP	1189
GRIPAP1	HGNC:18706	GRIPAP1	GRIP1 associated protein 1	GRASP-1, GRASP1, KIAA1167, MPMGp800B12492Q3, DKFZp434P0630	GO:0099152	regulation of neurotransmitter receptor transport, endosome to postsynaptic membrane (GO:0099152)	BP	1190
GRIA2	HGNC:4572	GRIA2	glutamate ionotropic receptor AMPA type subunit 2	GluA2, GLURB	GO:0099059	integral component of presynaptic active zone membrane (GO:0099059)	CC	1194
GRIA1	HGNC:4571	GRIA1	glutamate ionotropic receptor AMPA type subunit 1	GluA1, GLURA	GO:0099059	integral component of presynaptic active zone membrane (GO:0099059)	CC	1203
GRIA4	HGNC:4574	GRIA4	glutamate ionotropic receptor AMPA type subunit 4	GluA4, GLURD	GO:0099059	integral component of presynaptic active zone membrane (GO:0099059)	CC	1204
GRIA1	HGNC:4571	GRIA1	glutamate ionotropic receptor AMPA type subunit 1	GluA1, GLURA	GO:0099061	integral component of postsynaptic density membrane (GO:0099061)	CC	1205
GRIA2	HGNC:4572	GRIA2	glutamate ionotropic receptor AMPA type subunit 2	GluA2, GLURB	GO:0099056	integral component of presynaptic membrane (GO:0099056)	CC	1206
SNAP29	HGNC:11133	SNAP29	synaptosome associated protein 29	SNAP-29, CEDNIK	GO:0098693	regulation of synaptic vesicle cycle (GO:0098693)	BP	1210
SNAP47	HGNC:30669	SNAP47	synaptosome associated protein 47	SVAP1, SNAP-47	GO:0048786	presynaptic active zone (GO:0048786)	CC	1211
STX1A	HGNC:11433	STX1A	syntaxin 1A	HPC-1, p35-1	GO:0016079	synaptic vesicle exocytosis (GO:0016079)	BP	1247
STX1B	HGNC:18539	STX1B	syntaxin 1B		GO:0016079	synaptic vesicle exocytosis (GO:0016079)	BP	1248
GABBR1	HGNC:4070	GABBR1	gamma-aminobutyric acid type B receptor subunit 1	hGB1a, GPRC3A	GO:0099056	integral component of presynaptic membrane (GO:0099056)	CC	1251
STXBP5L	HGNC:30757	STXBP5L	syntaxin binding protein 5 like	KIAA1006, LLGL4	GO:0098992	neuronal dense core vesicle (GO:0098992)	CC	1256
STXBP5L	HGNC:30757	STXBP5L	syntaxin binding protein 5 like	KIAA1006, LLGL4	GO:2000300	regulation of synaptic vesicle exocytosis (GO:2000300)	BP	1257
ERBIN	HGNC:15842	ERBIN	erbb2 interacting protein	LAP2	GO:0099072	regulation of postsynaptic membrane neurotransmitter receptor levels (GO:0099072)	BP	1258
GABRA2	HGNC:4076	GABRA2	gamma-aminobutyric acid type A receptor alpha2 subunit		GO:0099059	integral component of presynaptic active zone membrane (GO:0099059)	CC	1266
GABRA2	HGNC:4076	GABRA2	gamma-aminobutyric acid type A receptor alpha2 subunit		GO:0099060	integral component of postsynaptic specialization membrane (GO:0099060)	CC	1267
GABRB2	HGNC:4082	GABRB2	gamma-aminobutyric acid type A receptor beta2 subunit		GO:0099059	integral component of presynaptic active zone membrane (GO:0099059)	CC	1276
GABRB2	HGNC:4082	GABRB2	gamma-aminobutyric acid type A receptor beta2 subunit		GO:0099060	integral component of postsynaptic specialization membrane (GO:0099060)	CC	1277
CDKL5	HGNC:11411	CDKL5	cyclin dependent kinase like 5	EIEE2, CFAP247	GO:0099175	regulation of postsynapse organization (GO:0099175)	BP	1278
DNM2	HGNC:2974	DNM2	dynamin 2	DYNII, DYN2, CMTDIB, CMTDI1, DI-CMTB, CMT2M	GO:0048488	synaptic vesicle endocytosis (GO:0048488)	BP	1279
NEFL	HGNC:7739	NEFL	neurofilament light	NFL, CMT1F, CMT2E, NF68, PPP1R110	GO:0099160	postsynaptic intermediate filament cytoskeleton (GO:0099160)	CC	1288
GABRA1	HGNC:4075	GABRA1	gamma-aminobutyric acid type A receptor alpha1 subunit	EJM5	GO:0099060	integral component of postsynaptic specialization membrane (GO:0099060)	CC	1301
CAPRIN1	HGNC:6743	CAPRIN1	cell cycle associated protein 1	caprin-1, RNG105	GO:0098794	postsynapse (GO:0098794)	CC	1317
PPP3R1	HGNC:9317	PPP3R1	protein phosphatase 3 regulatory subunit B, alpha	CALNB1, CNB, CNB1	GO:0099170	postsynaptic modulation of chemical synaptic transmission (GO:0099170)	BP	1329
NEDD4	HGNC:7727	NEDD4	neural precursor cell expressed, developmentally down-regulated 4, E3 ubiquitin protein ligase	KIAA0093, MGC176705, NEDD4-1, RPF1	GO:0099149	regulation of postsynaptic neurotransmitter receptor endocytosis (GO:0099149)	BP	1340
SCN1A	HGNC:10585	SCN1A	sodium voltage-gated channel alpha subunit 1	Nav1.1, GEFSP2, HBSCI, NAC1, SMEI	GO:0099056	integral component of presynaptic membrane (GO:0099056)	CC	1341
CPEB4	HGNC:21747	CPEB4	cytoplasmic polyadenylation element binding protein 4	KIAA1673	GO:0098794	postsynapse (GO:0098794)	CC	1345
PPP3CA	HGNC:9314	PPP3CA	protein phosphatase 3 catalytic subunit alpha	CNA1, PPP2B	GO:0099170	postsynaptic modulation of chemical synaptic transmission (GO:0099170)	BP	1346
GRIN1	HGNC:4584	GRIN1	glutamate ionotropic receptor NMDA type subunit 1	GluN1	GO:0099056	integral component of presynaptic membrane (GO:0099056)	CC	1348
GRIN2A	HGNC:4585	GRIN2A	glutamate ionotropic receptor NMDA type subunit 2A	GluN2A	GO:0099056	integral component of presynaptic membrane (GO:0099056)	CC	1349
GRIN2B	HGNC:4586	GRIN2B	glutamate ionotropic receptor NMDA type subunit 2B	GluN2B	GO:0099056	integral component of presynaptic membrane (GO:0099056)	CC	1350
ARL6IP5	HGNC:16937	ARL6IP5	ADP ribosylation factor like GTPase 6 interacting protein 5	PRAF3, JWA, GTRAP3-18, DERP11, HSPC127, Yip6b	GO:0051580	regulation of neurotransmitter uptake (GO:0051580)	BP	1358
PSD2	HGNC:19092	PSD2	pleckstrin and Sec7 domain containing 2	DKFZp761B0514, EFA6C	GO:0098794	postsynapse (GO:0098794)	CC	1359
IQSEC2	HGNC:29059	IQSEC2	IQ motif and Sec7 domain 2	KIAA0522, BRAG1, IQ-ArfGEF	GO:0098839	postsynaptic density membrane (GO:0098839)	CC	1361
EPN1	HGNC:21604	EPN1	epsin 1		GO:0098894	extrinsic component of presynaptic endocytic zone membrane (GO:0098894)	CC	1362
EPS15	HGNC:3419	EPS15	epidermal growth factor receptor pathway substrate 15	AF-1P, MLLT5	GO:0098894	extrinsic component of presynaptic endocytic zone membrane (GO:0098894)	CC	1363
EIF4A3	HGNC:18683	EIF4A3	eukaryotic translation initiation factor 4A3	KIAA0111, EIF4AIII, Fal1	GO:0099578	regulation of translation at postsynapse, modulating synaptic transmission (GO:0099578)	BP	1366
SYNGAP1	HGNC:11497	SYNGAP1	synaptic Ras GTPase activating protein 1	SYNGAP, RASA5, KIAA1938	GO:0098880	maintenance of postsynaptic specialization structure (GO:0098880)	BP	1372
ARF1	HGNC:652	ARF1	ADP ribosylation factor 1		GO:0098974	postsynaptic actin cytoskeleton organization (GO:0098974)	BP	1374
PAK1	HGNC:8590	PAK1	p21 (RAC1) activated kinase 1		GO:0098794	postsynapse (GO:0098794)	CC	1377
GRIN1	HGNC:4584	GRIN1	glutamate ionotropic receptor NMDA type subunit 1	GluN1	GO:0099059	integral component of presynaptic active zone membrane (GO:0099059)	CC	1385
GRIN2B	HGNC:4586	GRIN2B	glutamate ionotropic receptor NMDA type subunit 2B	GluN2B	GO:0099059	integral component of presynaptic active zone membrane (GO:0099059)	CC	1386
ARF4	HGNC:655	ARF4	ADP ribosylation factor 4		GO:0050807	regulation of synapse organization (GO:0050807)	BP	1392
STXBP5L	HGNC:30757	STXBP5L	syntaxin binding protein 5 like	KIAA1006, LLGL4	GO:2000300	regulation of synaptic vesicle exocytosis (GO:2000300)	BP	1395
RPH3A	HGNC:17056	RPH3A	rabphilin 3A	KIAA0985, rabphilin, exophilin-1	GO:0016082	synaptic vesicle priming (GO:0016082)	BP	1403
RPH3A	HGNC:17056	RPH3A	rabphilin 3A	KIAA0985, rabphilin, exophilin-1	GO:0098850	extrinsic component of synaptic vesicle membrane (GO:0098850)	CC	1405
PLPPR4	HGNC:23496	PLPPR4	phospholipid phosphatase related 4	PRG-1, LPPR4, KIAA0455, PHP1	GO:0099061	integral component of postsynaptic density membrane (GO:0099061)	CC	1412
PPP3CB	HGNC:9315	PPP3CB	protein phosphatase 3 catalytic subunit beta	CALNA2, CNA2, PP2Bbeta	GO:1900242	regulation of synaptic vesicle endocytosis (GO:1900242)	BP	1414
DBN1	HGNC:2695	DBN1	drebrin 1		GO:0099524	postsynaptic cytosol (GO:0099524)	CC	1434
SPTBN2	HGNC:11276	SPTBN2	spectrin beta, non-erythrocytic 2		GO:0099189	postsynaptic spectrin-associated cytoskeleton (GO:0099189)	CC	1440
SPTBN2	HGNC:11276	SPTBN2	spectrin beta, non-erythrocytic 2		GO:0099173	postsynapse organization (GO:0099173)	BP	1441
PPP1R1B	HGNC:9287	PPP1R1B	protein phosphatase 1 regulatory inhibitor subunit 1B	DARPP-32, FLJ20940	GO:0098794	postsynapse (GO:0098794)	CC	1455
GRIA2	HGNC:4572	GRIA2	glutamate ionotropic receptor AMPA type subunit 2	GluA2, GLURB	GO:0099061	integral component of postsynaptic density membrane (GO:0099061)	CC	1459
GRIN1	HGNC:4584	GRIN1	glutamate ionotropic receptor NMDA type subunit 1	GluN1	GO:0099061	integral component of postsynaptic density membrane (GO:0099061)	CC	1461
GRIN2B	HGNC:4586	GRIN2B	glutamate ionotropic receptor NMDA type subunit 2B	GluN2B	GO:0099061	integral component of postsynaptic density membrane (GO:0099061)	CC	1462
GUCY1B1	HGNC:4687	GUCY1B1	guanylate cyclase 1 soluble subunit beta 1	GC-SB3, GC-S-beta-1	GO:0098831	presynaptic active zone cytoplasmic component (GO:0098831)	CC	1465
SYN1	HGNC:11494	SYN1	synapsin I		GO:0099504	synaptic vesicle cycle (GO:0099504)	BP	1466
SYN2	HGNC:11495	SYN2	synapsin II	SYNII, SYNIIa, SYNIIb	GO:0099504	synaptic vesicle cycle (GO:0099504)	BP	1467
BCAN	HGNC:23059	BCAN	brevican	BEHAB, MGC13038, CSPG7	GO:0098966	perisynaptic extracellular matrix (GO:0098966)	CC	1473
BAIAP2	HGNC:947	BAIAP2	BAI1 associated protein 2	BAP2, IRSp53	GO:0050804	modulation of chemical synaptic transmission (GO:0050804)	BP	1478
SPTBN1	HGNC:11275	SPTBN1	spectrin beta, non-erythrocytic 1		GO:0098794	postsynapse (GO:0098794)	CC	1479
AMPH	HGNC:471	AMPH	amphiphysin		GO:0048488	synaptic vesicle endocytosis (GO:0048488)	BP	1494
BIN1	HGNC:1052	BIN1	bridging integrator 1	SH3P9, AMPH2	GO:0098850	extrinsic component of synaptic vesicle membrane (GO:0098850)	CC	1495
GRM3	HGNC:4595	GRM3	glutamate metabotropic receptor 3	GPRC1C, mGlu3, MGLUR3	GO:0099055	integral component of postsynaptic membrane (GO:0099055)	CC	1578
GABBR1	HGNC:4070	GABBR1	gamma-aminobutyric acid type B receptor subunit 1	hGB1a, GPRC3A	GO:0099579	G-protein coupled neurotransmitter receptor activity involved in regulation of postsynaptic membrane potential (GO:0099579)	BP	1587
GABBR1	HGNC:4070	GABBR1	gamma-aminobutyric acid type B receptor subunit 1	hGB1a, GPRC3A	GO:0099056	integral component of presynaptic membrane (GO:0099056)	CC	1588
EIF4G1	HGNC:3296	EIF4G1	eukaryotic translation initiation factor 4 gamma 1	p220, PARK18	GO:0098794	postsynapse (GO:0098794)	CC	1590
HNRNPA2B1	HGNC:5033	HNRNPA2B1	heterogeneous nuclear ribonucleoprotein A2/B1		GO:0099524	postsynaptic cytosol (GO:0099524)	CC	1592
HNRNPK	HGNC:5044	HNRNPK	heterogeneous nuclear ribonucleoprotein K	CSBP, TUNP	GO:0098794	postsynapse (GO:0098794)	CC	1596
HNRNPK	HGNC:5044	HNRNPK	heterogeneous nuclear ribonucleoprotein K	CSBP, TUNP	GO:0050804	modulation of chemical synaptic transmission (GO:0050804)	BP	1597
BAIAP2	HGNC:947	BAIAP2	BAI1 associated protein 2	BAP2, IRSp53	GO:1905274	regulation of modification of postsynaptic actin cytoskeleton (GO:1905274)	BP	1603
SYT1	HGNC:11509	SYT1	synaptotagmin 1	P65	GO:0030285	integral component of synaptic vesicle membrane (GO:0030285)	CC	1609
SYT1	HGNC:11509	SYT1	synaptotagmin 1	P65	GO:0099502	calcium-dependent activation of synaptic vesicle fusion (GO:0099502)	BP	1610
STX1B	HGNC:18539	STX1B	syntaxin 1B		GO:0031629	synaptic vesicle fusion to presynaptic active zone membrane (GO:0031629)	BP	1623
DPYSL2	HGNC:3014	DPYSL2	dihydropyrimidinase like 2	DRP-2, DHPRP2, CRMP2, DRP2	SYNGO:transport	transport	BP	1628
APBB1	HGNC:581	APBB1	amyloid beta precursor protein binding family B member 1	Fe65	GO:0050808	synapse organization (GO:0050808)	BP	1629
DNM1	HGNC:2972	DNM1	dynamin 1		GO:0048488	synaptic vesicle endocytosis (GO:0048488)	BP	1632
CSPG5	HGNC:2467	CSPG5	chondroitin sulfate proteoglycan 5	NGC	GO:0099055	integral component of postsynaptic membrane (GO:0099055)	CC	1657
PFN1	HGNC:8881	PFN1	profilin 1		GO:0060074	synapse maturation (GO:0060074)	BP	1663
EPS8	HGNC:3420	EPS8	epidermal growth factor receptor pathway substrate 8		GO:0014069	postsynaptic density (GO:0014069)	CC	1670
GABBR1	HGNC:4070	GABBR1	gamma-aminobutyric acid type B receptor subunit 1	hGB1a, GPRC3A	GO:0099055	integral component of postsynaptic membrane (GO:0099055)	CC	1678
PPP1R9A	HGNC:14946	PPP1R9A	protein phosphatase 1 regulatory subunit 9A	Neurabin-I, KIAA1222, FLJ20068	GO:0050804	modulation of chemical synaptic transmission (GO:0050804)	BP	1682
TUBA1A	HGNC:20766	TUBA1A	tubulin alpha 1a	TUBA3, B-ALPHA-1, FLJ25113	GO:0050807	regulation of synapse organization (GO:0050807)	BP	1684
TUBB	HGNC:20778	TUBB	tubulin beta class I	OK/SW-cl.56, MGC16435, M40, Tubb5	GO:0050807	regulation of synapse organization (GO:0050807)	BP	1685
TUBB2B	HGNC:30829	TUBB2B	tubulin beta 2B class IIb	MGC8685, DKFZp566F223, bA506K6.1	GO:0050804	modulation of chemical synaptic transmission (GO:0050804)	BP	1686
NEFL	HGNC:7739	NEFL	neurofilament light	NFL, CMT1F, CMT2E, NF68, PPP1R110	GO:0099182	presynaptic intermediate filament cytoskeleton (GO:0099182)	CC	1687
NEFL	HGNC:7739	NEFL	neurofilament light	NFL, CMT1F, CMT2E, NF68, PPP1R110	GO:0090128	regulation of synapse maturation (GO:0090128)	BP	1688
VAPA	HGNC:12648	VAPA	VAMP associated protein A	hVAP-33, VAP-A	GO:0099056	integral component of presynaptic membrane (GO:0099056)	CC	1689
SNAP47	HGNC:30669	SNAP47	synaptosome associated protein 47	SVAP1, SNAP-47	GO:0014069	postsynaptic density (GO:0014069)	CC	1690
AMPH	HGNC:471	AMPH	amphiphysin		GO:0098793	presynapse (GO:0098793)	CC	1692
PICALM	HGNC:15514	PICALM	phosphatidylinositol binding clathrin assembly protein	CALM, CLTH	GO:0098894	extrinsic component of presynaptic endocytic zone membrane (GO:0098894)	CC	1693
DLGAP1	HGNC:2905	DLGAP1	DLG associated protein 1	GKAP, SAPAP1, DAP-1	GO:0099092	postsynaptic density, intracellular component (GO:0099092)	CC	1695
APOE	HGNC:613	APOE	apolipoprotein E		GO:0050807	regulation of synapse organization (GO:0050807)	BP	1698
DNM3	HGNC:29125	DNM3	dynamin 3	KIAA0820	GO:0098793	presynapse (GO:0098793)	CC	1699
PACSIN1	HGNC:8570	PACSIN1	protein kinase C and casein kinase substrate in neurons 1	SDPI	GO:0098833	presynaptic endocytic zone (GO:0098833)	CC	1700
SH3GL2	HGNC:10831	SH3GL2	SH3 domain containing GRB2 like 2, endophilin A1	SH3P4, SH3D2A, CNSA2, EEN-B1	GO:0045202	synapse (GO:0045202)	CC	1701
DNM1	HGNC:2972	DNM1	dynamin 1		GO:0098835	presynaptic endocytic zone membrane (GO:0098835)	CC	1703
DNM1	HGNC:2972	DNM1	dynamin 1		GO:0098835	presynaptic endocytic zone membrane (GO:0098835)	CC	1704
SNAP91	HGNC:14986	SNAP91	synaptosome associated protein 91	KIAA0656, AP180, CALM	GO:0098894	extrinsic component of presynaptic endocytic zone membrane (GO:0098894)	CC	1706
SPTBN2	HGNC:11276	SPTBN2	spectrin beta, non-erythrocytic 2		GO:0099186	structural constituent of postsynapse (GO:0099186)	BP	1713
DLGAP4	HGNC:24476	DLGAP4	DLG associated protein 4	DAP4, KIAA0964, SAPAP4	GO:0099572	postsynaptic specialization (GO:0099572)	CC	1716
ADGRB1	HGNC:943	ADGRB1	adhesion G protein-coupled receptor B1		GO:0099055	integral component of postsynaptic membrane (GO:0099055)	CC	1721
CAMKV	HGNC:28788	CAMKV	CaM kinase like vesicle associated	MGC8407, VACAMKL	GO:0098794	postsynapse (GO:0098794)	CC	1723
CAMKV	HGNC:28788	CAMKV	CaM kinase like vesicle associated	MGC8407, VACAMKL	GO:0099159	regulation of modification of postsynaptic structure (GO:0099159)	BP	1724
DAG1	HGNC:2666	DAG1	dystroglycan 1	A3a, 156DAG, AGRNR, DAG	GO:0098696	regulation of neurotransmitter receptor localization to postsynaptic specialization membrane (GO:0098696)	BP	1745
ARHGEF2	HGNC:682	ARHGEF2	Rho/Rac guanine nucleotide exchange factor 2	LFP40, GEF-H1, KIAA0651, P40	GO:0099092	postsynaptic density, intracellular component (GO:0099092)	CC	1747
CADM1	HGNC:5951	CADM1	cell adhesion molecule 1	NECL2, ST17, BL2, SYNCAM, IGSF4A, Necl-2, SYNCAM1, RA175	GO:0007416	synapse assembly (GO:0007416)	BP	1753
ADGRL2	HGNC:18582	ADGRL2	adhesion G protein-coupled receptor L2	KIAA0786, LEC1	GO:0099055	integral component of postsynaptic membrane (GO:0099055)	CC	1758
ADGRL2	HGNC:18582	ADGRL2	adhesion G protein-coupled receptor L2	KIAA0786, LEC1	GO:0050808	synapse organization (GO:0050808)	BP	1759
HSPA8	HGNC:5241	HSPA8	heat shock protein family A (Hsp70) member 8	HSC71, HSC70, HSP73	GO:0098793	presynapse (GO:0098793)	CC	1761
EHD1	HGNC:3242	EHD1	EH domain containing 1	H-PAST, HPAST1, FLJ42622, FLJ44618	GO:0098793	presynapse (GO:0098793)	CC	1762
ERBIN	HGNC:15842	ERBIN	erbb2 interacting protein	LAP2	GO:0098794	postsynapse (GO:0098794)	CC	1764
NRXN3	HGNC:8010	NRXN3	neurexin 3	KIAA0743	GO:0099171	presynaptic modulation of chemical synaptic transmission (GO:0099171)	BP	1770
FARP1	HGNC:3591	FARP1	FERM, ARH/RhoGEF and pleckstrin domain protein 1	CDEP, PLEKHC2, MGC87400, PPP1R75	GO:1905606	regulation of presynapse assembly (GO:1905606)	BP	1772
FARP1	HGNC:3591	FARP1	FERM, ARH/RhoGEF and pleckstrin domain protein 1	CDEP, PLEKHC2, MGC87400, PPP1R75	GO:0098974	postsynaptic actin cytoskeleton organization (GO:0098974)	BP	1773
CDH2	HGNC:1759	CDH2	cadherin 2	CDHN, CD325	GO:0099056	integral component of presynaptic membrane (GO:0099056)	CC	1774
CTNNA2	HGNC:2510	CTNNA2	catenin alpha 2	CAP-R, CT114	GO:0098890	extrinsic component of postsynaptic membrane (GO:0098890)	CC	1775
CTNNA2	HGNC:2510	CTNNA2	catenin alpha 2	CAP-R, CT114	GO:0098888	extrinsic component of presynaptic membrane (GO:0098888)	CC	1776
CTNNB1	HGNC:2514	CTNNB1	catenin beta 1	beta-catenin, armadillo	GO:0042734	presynaptic membrane (GO:0042734)	CC	1777
CTNNB1	HGNC:2514	CTNNB1	catenin beta 1	beta-catenin, armadillo	GO:0045211	postsynaptic membrane (GO:0045211)	CC	1778
DLGAP2	HGNC:2906	DLGAP2	DLG associated protein 2	DAP-2	GO:0098962	regulation of postsynaptic neurotransmitter receptor activity (GO:0098962)	BP	1780
GIT1	HGNC:4272	GIT1	GIT ArfGAP 1		GO:0098794	postsynapse (GO:0098794)	CC	1781
GIT1	HGNC:4272	GIT1	GIT ArfGAP 1		GO:0098879	structural constituent of postsynaptic specialization (GO:0098879)	BP	1782
GIT1	HGNC:4272	GIT1	GIT ArfGAP 1		GO:2000300	regulation of synaptic vesicle exocytosis (GO:2000300)	BP	1783
HPCA	HGNC:5144	HPCA	hippocalcin		GO:0099149	regulation of postsynaptic neurotransmitter receptor endocytosis (GO:0099149)	BP	1785
GSK3B	HGNC:4617	GSK3B	glycogen synthase kinase 3 beta		GO:0014069	postsynaptic density (GO:0014069)	CC	1787
ROCK2	HGNC:10252	ROCK2	Rho associated coiled-coil containing protein kinase 2		GO:0098974	postsynaptic actin cytoskeleton organization (GO:0098974)	BP	1788
GSK3B	HGNC:4617	GSK3B	glycogen synthase kinase 3 beta		GO:0099159	regulation of modification of postsynaptic structure (GO:0099159)	BP	1789
PFN1	HGNC:8881	PFN1	profilin 1		GO:0098885	modification of postsynaptic actin cytoskeleton (GO:0098885)	BP	1790
PFN2	HGNC:8882	PFN2	profilin 2		GO:0098885	modification of postsynaptic actin cytoskeleton (GO:0098885)	BP	1791
MYO6	HGNC:7605	MYO6	myosin VI	KIAA0389	GO:0099171	presynaptic modulation of chemical synaptic transmission (GO:0099171)	BP	1792
DNM1L	HGNC:2973	DNM1L	dynamin 1 like	DRP1, DVLP, HDYNIV, DYMPLE, VPS1	GO:0098835	presynaptic endocytic zone membrane (GO:0098835)	CC	1795
DNM1L	HGNC:2973	DNM1L	dynamin 1 like	DRP1, DVLP, HDYNIV, DYMPLE, VPS1	GO:0030672	synaptic vesicle membrane (GO:0030672)	CC	1796
DNM1L	HGNC:2973	DNM1L	dynamin 1 like	DRP1, DVLP, HDYNIV, DYMPLE, VPS1	GO:0048488	synaptic vesicle endocytosis (GO:0048488)	BP	1797
MYO6	HGNC:7605	MYO6	myosin VI	KIAA0389	GO:0098871	postsynaptic actin cytoskeleton (GO:0098871)	CC	1799
MYO6	HGNC:7605	MYO6	myosin VI	KIAA0389	GO:0098884	postsynaptic neurotransmitter receptor endocytosis (GO:0098884)	BP	1800
TNIK	HGNC:30765	TNIK	TRAF2 and NCK interacting kinase	KIAA0551	GO:0099092	postsynaptic density, intracellular component (GO:0099092)	CC	1809
ACTN2	HGNC:164	ACTN2	actinin alpha 2		GO:0098839	postsynaptic density membrane (GO:0098839)	CC	1811
ACTN2	HGNC:164	ACTN2	actinin alpha 2		GO:0099092	postsynaptic density, intracellular component (GO:0099092)	CC	1812
TNIK	HGNC:30765	TNIK	TRAF2 and NCK interacting kinase	KIAA0551	GO:0098696	regulation of neurotransmitter receptor localization to postsynaptic specialization membrane (GO:0098696)	BP	1813
SIPA1L1	HGNC:20284	SIPA1L1	signal induced proliferation associated 1 like 1	KIAA0440, E6TP1	GO:0098794	postsynapse (GO:0098794)	CC	1814
SLC1A2	HGNC:10940	SLC1A2	solute carrier family 1 member 2	GLT-1, EAAT2	GO:0099056	integral component of presynaptic membrane (GO:0099056)	CC	1819
SLC1A2	HGNC:10940	SLC1A2	solute carrier family 1 member 2	GLT-1, EAAT2	GO:0098810	neurotransmitter reuptake (GO:0098810)	BP	1820
AP1G1	HGNC:555	AP1G1	adaptor related protein complex 1 subunit gamma 1		GO:0048488	synaptic vesicle endocytosis (GO:0048488)	BP	1821
HNRNPU	HGNC:5048	HNRNPU	heterogeneous nuclear ribonucleoprotein U	SAF-A, hnRNPU, FLJ37978, FLJ30202	GO:0098963	dendritic transport of messenger ribonucleoprotein complex (GO:0098963)	BP	1834
PTPRS	HGNC:9681	PTPRS	protein tyrosine phosphatase, receptor type S		GO:0099054	presynapse assembly (GO:0099054)	BP	1843
TNIK	HGNC:30765	TNIK	TRAF2 and NCK interacting kinase	KIAA0551	GO:0098793	presynapse (GO:0098793)	CC	1847
NEDD4	HGNC:7727	NEDD4	neural precursor cell expressed, developmentally down-regulated 4, E3 ubiquitin protein ligase	KIAA0093, MGC176705, NEDD4-1, RPF1	GO:0099576	regulation of protein catabolic process at postsynapse, modulating synaptic transmission (GO:0099576)	BP	1854
GUCY1B1	HGNC:4687	GUCY1B1	guanylate cyclase 1 soluble subunit beta 1	GC-SB3, GC-S-beta-1	GO:0098831	presynaptic active zone cytoplasmic component (GO:0098831)	CC	1855
MTOR	HGNC:3942	MTOR	mechanistic target of rapamycin kinase	RAFT1, RAPT1, FLJ44809	GO:0099547	regulation of translation at synapse, modulating synaptic transmission (GO:0099547)	BP	1869
ADGRB1	HGNC:943	ADGRB1	adhesion G protein-coupled receptor B1		GO:0098974	postsynaptic actin cytoskeleton organization (GO:0098974)	BP	1883
DAG1	HGNC:2666	DAG1	dystroglycan 1	A3a, 156DAG, AGRNR, DAG	GO:0050807	regulation of synapse organization (GO:0050807)	BP	1884
DAG1	HGNC:2666	DAG1	dystroglycan 1	A3a, 156DAG, AGRNR, DAG	GO:0098942	retrograde trans-synaptic signaling by trans-synaptic protein complex (GO:0098942)	BP	1885
NRCAM	HGNC:7994	NRCAM	neuronal cell adhesion molecule	KIAA0343, Bravo	GO:0099055	integral component of postsynaptic membrane (GO:0099055)	CC	1888
GSK3B	HGNC:4617	GSK3B	glycogen synthase kinase 3 beta		GO:0098696	regulation of neurotransmitter receptor localization to postsynaptic specialization membrane (GO:0098696)	BP	1891
PAK1	HGNC:8590	PAK1	p21 (RAC1) activated kinase 1		GO:0090128	regulation of synapse maturation (GO:0090128)	BP	1893
PAK2	HGNC:8591	PAK2	p21 (RAC1) activated kinase 2	PAK65, PAKgamma	GO:0090128	regulation of synapse maturation (GO:0090128)	BP	1893
PAK3	HGNC:8592	PAK3	p21 (RAC1) activated kinase 3	hPAK3, bPAK	GO:0090128	regulation of synapse maturation (GO:0090128)	BP	1893
RTN4	HGNC:14085	RTN4	reticulon 4	NSP-CL, KIAA0886, NOGO, ASY	GO:0099061	integral component of postsynaptic density membrane (GO:0099061)	CC	1902
SLC6A1	HGNC:11042	SLC6A1	solute carrier family 6 member 1	GAT1, GABATR, GABATHG	GO:0099056	integral component of presynaptic membrane (GO:0099056)	CC	1903
BCAN	HGNC:23059	BCAN	brevican	BEHAB, MGC13038, CSPG7	GO:0060074	synapse maturation (GO:0060074)	BP	1915
MTOR	HGNC:3942	MTOR	mechanistic target of rapamycin kinase	RAFT1, RAPT1, FLJ44809	GO:0099524	postsynaptic cytosol (GO:0099524)	CC	1917
HNRNPK	HGNC:5044	HNRNPK	heterogeneous nuclear ribonucleoprotein K	CSBP, TUNP	GO:0099175	regulation of postsynapse organization (GO:0099175)	BP	1918
GIT2	HGNC:4273	GIT2	GIT ArfGAP 2	KIAA0148, PKL	GO:2000300	regulation of synaptic vesicle exocytosis (GO:2000300)	BP	1921
DBN1	HGNC:2695	DBN1	drebrin 1		GO:0098974	postsynaptic actin cytoskeleton organization (GO:0098974)	BP	1924
CHMP2B	HGNC:24537	CHMP2B	charged multivesicular body protein 2B	DKFZP564O123, CHMP2.5, VPS2B	GO:0099159	regulation of modification of postsynaptic structure (GO:0099159)	BP	1925
DBN1	HGNC:2695	DBN1	drebrin 1		GO:0045211	postsynaptic membrane (GO:0045211)	CC	1926
GRM3	HGNC:4595	GRM3	glutamate metabotropic receptor 3	GPRC1C, mGlu3, MGLUR3	GO:0099056	integral component of presynaptic membrane (GO:0099056)	CC	1943
GIT1	HGNC:4272	GIT1	GIT ArfGAP 1		GO:0099645	neurotransmitter receptor localization to postsynaptic specialization membrane (GO:0099645)	BP	1949
SHANK2	HGNC:14295	SHANK2	SH3 and multiple ankyrin repeat domains 2	CTTNBP1, ProSAP1, SHANK, SPANK-3	GO:0098919	structural constituent of postsynaptic density (GO:0098919)	BP	1958
SHANK2	HGNC:14295	SHANK2	SH3 and multiple ankyrin repeat domains 2	CTTNBP1, ProSAP1, SHANK, SPANK-3	GO:0099175	regulation of postsynapse organization (GO:0099175)	BP	1962
DBN1	HGNC:2695	DBN1	drebrin 1		GO:0014069	postsynaptic density (GO:0014069)	CC	1964
DBN1	HGNC:2695	DBN1	drebrin 1		GO:0045211	postsynaptic membrane (GO:0045211)	CC	1965
SPARCL1	HGNC:11220	SPARCL1	SPARC like 1	MAST9	GO:0050807	regulation of synapse organization (GO:0050807)	BP	1966
CSPG5	HGNC:2467	CSPG5	chondroitin sulfate proteoglycan 5	NGC	GO:2000300	regulation of synaptic vesicle exocytosis (GO:2000300)	BP	1967
AMPH	HGNC:471	AMPH	amphiphysin		GO:0098833	presynaptic endocytic zone (GO:0098833)	CC	2001
SH3GL2	HGNC:10831	SH3GL2	SH3 domain containing GRB2 like 2, endophilin A1	SH3P4, SH3D2A, CNSA2, EEN-B1	GO:0099523	presynaptic cytosol (GO:0099523)	CC	2002
PICALM	HGNC:15514	PICALM	phosphatidylinositol binding clathrin assembly protein	CALM, CLTH	GO:0098794	postsynapse (GO:0098794)	CC	2003
SNAP91	HGNC:14986	SNAP91	synaptosome associated protein 91	KIAA0656, AP180, CALM	GO:0045211	postsynaptic membrane (GO:0045211)	CC	2004
DLG1	HGNC:2900	DLG1	discs large MAGUK scaffold protein 1	SAP97, SAP-97, hdlg, DLGH1, dJ1061C18.1.1	GO:0099092	postsynaptic density, intracellular component (GO:0099092)	CC	2049
DLG2	HGNC:2901	DLG2	discs large MAGUK scaffold protein 2	PSD-93, PSD93, chapsyn-110, PPP1R58	GO:0099031	anchored component of postsynaptic density membrane (GO:0099031)	CC	2050
DLG4	HGNC:2903	DLG4	discs large MAGUK scaffold protein 4	PSD-95, PSD95, SAP90, SAP-90	GO:0099031	anchored component of postsynaptic density membrane (GO:0099031)	CC	2051
DLG3	HGNC:2902	DLG3	discs large MAGUK scaffold protein 3	NE-Dlg, SAP102, SAP-102, NEDLG, KIAA1232, MRX90, PPP1R82	GO:0099092	postsynaptic density, intracellular component (GO:0099092)	CC	2052
GABRA1	HGNC:4075	GABRA1	gamma-aminobutyric acid type A receptor alpha1 subunit	EJM5	GO:1904315	transmitter-gated ion channel activity involved in regulation of postsynaptic membrane potential (GO:1904315)	BP	2054
GABRA2	HGNC:4076	GABRA2	gamma-aminobutyric acid type A receptor alpha2 subunit		GO:0099060	integral component of postsynaptic specialization membrane (GO:0099060)	CC	2058
GABRB3	HGNC:4083	GABRB3	gamma-aminobutyric acid type A receptor beta3 subunit		GO:1904315	transmitter-gated ion channel activity involved in regulation of postsynaptic membrane potential (GO:1904315)	BP	2060
GABRA1	HGNC:4075	GABRA1	gamma-aminobutyric acid type A receptor alpha1 subunit	EJM5	GO:0099060	integral component of postsynaptic specialization membrane (GO:0099060)	CC	2061
GRM5	HGNC:4597	GRM5	glutamate metabotropic receptor 5	MGLUR5, GPRC1E, mGlu5, PPP1R86	GO:0050804	modulation of chemical synaptic transmission (GO:0050804)	BP	2064
AMPH	HGNC:471	AMPH	amphiphysin		GO:0098894	extrinsic component of presynaptic endocytic zone membrane (GO:0098894)	CC	2077
AP1G1	HGNC:555	AP1G1	adaptor related protein complex 1 subunit gamma 1		GO:0016182	synaptic vesicle budding from endosome (GO:0016182)	BP	2104
NTRK2	HGNC:8032	NTRK2	neurotrophic receptor tyrosine kinase 2	TRKB	GO:0099183	trans-synaptic signaling by BDNF, modulating synaptic transmission (GO:0099183)	BP	2108
DNAJC6	HGNC:15469	DNAJC6	DnaJ heat shock protein family (Hsp40) member C6	KIAA0473, PARK19	GO:0016191	synaptic vesicle uncoating (GO:0016191)	BP	2115
SYNE1	HGNC:17089	SYNE1	spectrin repeat containing nuclear envelope protein 1	SYNE-1B, KIAA0796, 8B, Nesprin-1, enaptin, MYNE1, CPG2, dJ45H2.2, SCAR8, ARCA1, Nesp1	GO:0099149	regulation of postsynaptic neurotransmitter receptor endocytosis (GO:0099149)	BP	2116
HIP1	HGNC:4913	HIP1	huntingtin interacting protein 1	ILWEQ	GO:0098793	presynapse (GO:0098793)	CC	2125
HIP1	HGNC:4913	HIP1	huntingtin interacting protein 1	ILWEQ	GO:0045211	postsynaptic membrane (GO:0045211)	CC	2126
PTK2	HGNC:9611	PTK2	protein tyrosine kinase 2	FAK, FADK, FAK1, PPP1R71	GO:0098794	postsynapse (GO:0098794)	CC	2127
PTK2B	HGNC:9612	PTK2B	protein tyrosine kinase 2 beta	CAKB, PYK2, RAFTK, PTK, CADTK	GO:0098794	postsynapse (GO:0098794)	CC	2131
SCG2	HGNC:10575	SCG2	secretogranin II	CHGC, SgII, SN	GO:0098992	neuronal dense core vesicle (GO:0098992)	CC	2132
MYH10	HGNC:7568	MYH10	myosin heavy chain 10	NMMHCB	GO:1905274	regulation of modification of postsynaptic actin cytoskeleton (GO:1905274)	BP	2140
MYO5A	HGNC:7602	MYO5A	myosin VA	MYO5, GS1, MYR12	GO:0099089	establishment of endoplasmic reticulum localization to postsynapse (GO:0099089)	BP	2143
ITGB1	HGNC:6153	ITGB1	integrin subunit beta 1	CD29, GPIIA	GO:0099055	integral component of postsynaptic membrane (GO:0099055)	CC	2154
AP2B1	HGNC:563	AP2B1	adaptor related protein complex 2 subunit beta 1		GO:0098884	postsynaptic neurotransmitter receptor endocytosis (GO:0098884)	BP	2157
AP3D1	HGNC:568	AP3D1	adaptor related protein complex 3 subunit delta 1	ADTD	GO:0098830	presynaptic endosome (GO:0098830)	CC	2158
SNAP23	HGNC:11131	SNAP23	synaptosome associated protein 23	SNAP23A, SNAP23B, HsT17016	GO:0098967	exocytic insertion of neurotransmitter receptor to postsynaptic membrane (GO:0098967)	BP	2162
SNAP47	HGNC:30669	SNAP47	synaptosome associated protein 47	SVAP1, SNAP-47	GO:0098967	exocytic insertion of neurotransmitter receptor to postsynaptic membrane (GO:0098967)	BP	2163
GABRB3	HGNC:4083	GABRB3	gamma-aminobutyric acid type A receptor beta3 subunit		GO:0099055	integral component of postsynaptic membrane (GO:0099055)	CC	2170
GABRB3	HGNC:4083	GABRB3	gamma-aminobutyric acid type A receptor beta3 subunit		GO:0099060	integral component of postsynaptic specialization membrane (GO:0099060)	CC	2171
GABRA2	HGNC:4076	GABRA2	gamma-aminobutyric acid type A receptor alpha2 subunit		GO:0099060	integral component of postsynaptic specialization membrane (GO:0099060)	CC	2172
GABRA1	HGNC:4075	GABRA1	gamma-aminobutyric acid type A receptor alpha1 subunit	EJM5	GO:0099060	integral component of postsynaptic specialization membrane (GO:0099060)	CC	2173
GABBR1	HGNC:4070	GABBR1	gamma-aminobutyric acid type B receptor subunit 1	hGB1a, GPRC3A	GO:0099060	integral component of postsynaptic specialization membrane (GO:0099060)	CC	2174
GABBR1	HGNC:4070	GABBR1	gamma-aminobutyric acid type B receptor subunit 1	hGB1a, GPRC3A	GO:0099055	integral component of postsynaptic membrane (GO:0099055)	CC	2175
GABBR1	HGNC:4070	GABBR1	gamma-aminobutyric acid type B receptor subunit 1	hGB1a, GPRC3A	GO:0099059	integral component of presynaptic active zone membrane (GO:0099059)	CC	2176
PRRT1	HGNC:13943	PRRT1	proline rich transmembrane protein 1	NG5, IFITMD7, DSPD1	GO:0099055	integral component of postsynaptic membrane (GO:0099055)	CC	2181
ABR	HGNC:81	ABR	ABR, RhoGEF and GTPase activating protein	MDB	GO:0099092	postsynaptic density, intracellular component (GO:0099092)	CC	2191
BCR	HGNC:1014	BCR	BCR, RhoGEF and GTPase activating protein	D22S662, CML, PHL, ALL	GO:0099092	postsynaptic density, intracellular component (GO:0099092)	CC	2192
MYO5A	HGNC:7602	MYO5A	myosin VA	MYO5, GS1, MYR12	SYNGO:transport	transport	BP	2197
AP3D1	HGNC:568	AP3D1	adaptor related protein complex 3 subunit delta 1	ADTD	GO:0016182	synaptic vesicle budding from endosome (GO:0016182)	BP	2198
SYNE1	HGNC:17089	SYNE1	spectrin repeat containing nuclear envelope protein 1	SYNE-1B, KIAA0796, 8B, Nesprin-1, enaptin, MYNE1, CPG2, dJ45H2.2, SCAR8, ARCA1, Nesp1	GO:0098843	postsynaptic endocytic zone (GO:0098843)	CC	2200
HSPA8	HGNC:5241	HSPA8	heat shock protein family A (Hsp70) member 8	HSC71, HSC70, HSP73	GO:0014069	postsynaptic density (GO:0014069)	CC	2201
NEFL	HGNC:7739	NEFL	neurofilament light	NFL, CMT1F, CMT2E, NF68, PPP1R110	GO:0099184	structural constituent of postsynaptic intermediate filament cytoskeleton (GO:0099184)	BP	2202
ITGB1	HGNC:6153	ITGB1	integrin subunit beta 1	CD29, GPIIA	GO:0099699	integral component of synaptic membrane (GO:0099699)	CC	2211
NCAM1	HGNC:7656	NCAM1	neural cell adhesion molecule 1	NCAM, CD56	GO:0099056	integral component of presynaptic membrane (GO:0099056)	CC	2224
AP2M1	HGNC:564	AP2M1	adaptor related protein complex 2 subunit mu 1	AP50, mu2	GO:0098884	postsynaptic neurotransmitter receptor endocytosis (GO:0098884)	BP	2225
AP3D1	HGNC:568	AP3D1	adaptor related protein complex 3 subunit delta 1	ADTD	GO:0098943	neurotransmitter receptor transport, postsynaptic endosome to lysosome (GO:0098943)	BP	2226
STAU1	HGNC:11370	STAU1	staufen double-stranded RNA binding protein 1	PPP1R150	GO:0099010	modification of postsynaptic structure (GO:0099010)	BP	2229
STAU1	HGNC:11370	STAU1	staufen double-stranded RNA binding protein 1	PPP1R150	GO:0050804	modulation of chemical synaptic transmission (GO:0050804)	BP	2230
MYO5A	HGNC:7602	MYO5A	myosin VA	MYO5, GS1, MYR12	GO:0099566	regulation of postsynaptic cytosolic calcium levels (GO:0099566)	BP	2244
PTPRS	HGNC:9681	PTPRS	protein tyrosine phosphatase, receptor type S		GO:0099056	integral component of presynaptic membrane (GO:0099056)	CC	2246
PTPRF	HGNC:9670	PTPRF	protein tyrosine phosphatase, receptor type F		GO:0099061	integral component of postsynaptic density membrane (GO:0099061)	CC	2247
PTPRD	HGNC:9668	PTPRD	protein tyrosine phosphatase, receptor type D	PTPD, HPTP	GO:0099056	integral component of presynaptic membrane (GO:0099056)	CC	2248
GABRB2	HGNC:4082	GABRB2	gamma-aminobutyric acid type A receptor beta2 subunit		GO:0099060	integral component of postsynaptic specialization membrane (GO:0099060)	CC	2252
GABRB2	HGNC:4082	GABRB2	gamma-aminobutyric acid type A receptor beta2 subunit		GO:1904315	transmitter-gated ion channel activity involved in regulation of postsynaptic membrane potential (GO:1904315)	BP	2253
GABRA2	HGNC:4076	GABRA2	gamma-aminobutyric acid type A receptor alpha2 subunit		GO:0099060	integral component of postsynaptic specialization membrane (GO:0099060)	CC	2264
APP	HGNC:620	APP	amyloid beta precursor protein		GO:1905606	regulation of presynapse assembly (GO:1905606)	BP	2279
CALB1	HGNC:1434	CALB1	calbindin 1		GO:0099567	calcium ion binding involved in regulation of postsynaptic cytosolic calcium levels (GO:0099567)	BP	2289
CORO1A	HGNC:2252	CORO1A	coronin 1A	HCORO1, p57, coronin-1	GO:0045202	synapse (GO:0045202)	CC	2294
PLS3	HGNC:9091	PLS3	plastin 3	T-plastin	GO:0098699	structural constituent of presynaptic actin cytoskeleton (GO:0098699)	BP	2295
FARP1	HGNC:3591	FARP1	FERM, ARH/RhoGEF and pleckstrin domain protein 1	CDEP, PLEKHC2, MGC87400, PPP1R75	GO:0098942	retrograde trans-synaptic signaling by trans-synaptic protein complex (GO:0098942)	BP	2304
PTPRZ1	HGNC:9685	PTPRZ1	protein tyrosine phosphatase, receptor type Z1	PTP18, RPTPB, phosphacan	GO:0099061	integral component of postsynaptic density membrane (GO:0099061)	CC	2313
CAPZB	HGNC:1491	CAPZB	capping actin protein of muscle Z-line subunit beta		GO:0014069	postsynaptic density (GO:0014069)	CC	2315
SNX1	HGNC:11172	SNX1	sorting nexin 1	SNX1A, MGC8664, HsT17379, Vps5	GO:0099092	postsynaptic density, intracellular component (GO:0099092)	CC	2334
PTPRF	HGNC:9670	PTPRF	protein tyrosine phosphatase, receptor type F		GO:0099175	regulation of postsynapse organization (GO:0099175)	BP	2335
GAPDH	HGNC:4141	GAPDH	glyceraldehyde-3-phosphate dehydrogenase		GO:0099092	postsynaptic density, intracellular component (GO:0099092)	CC	2347
GAPDH	HGNC:4141	GAPDH	glyceraldehyde-3-phosphate dehydrogenase		GO:0098850	extrinsic component of synaptic vesicle membrane (GO:0098850)	CC	2348
YWHAZ	HGNC:12855	YWHAZ	tyrosine 3-monooxygenase/tryptophan 5-monooxygenase activation protein zeta	KCIP-1, 14-3-3-zeta	GO:0008039	synaptic target recognition (GO:0008039)	BP	2352
NPTX1	HGNC:7952	NPTX1	neuronal pentraxin 1		GO:0043083	synaptic cleft (GO:0043083)	CC	2353
NPTX1	HGNC:7952	NPTX1	neuronal pentraxin 1		GO:0099645	neurotransmitter receptor localization to postsynaptic specialization membrane (GO:0099645)	BP	2354
NPTX1	HGNC:7952	NPTX1	neuronal pentraxin 1		GO:0097107	postsynaptic density assembly (GO:0097107)	BP	2355
CTNND1	HGNC:2515	CTNND1	catenin delta 1	KIAA0384, p120, p120cas, p120ctn	GO:0098831	presynaptic active zone cytoplasmic component (GO:0098831)	CC	2360
CNKSR2	HGNC:19701	CNKSR2	connector enhancer of kinase suppressor of Ras 2	KIAA0902, CNK2, KSR2	GO:0099147	extrinsic component of postsynaptic density membrane (GO:0099147)	CC	2365
CTNND1	HGNC:2515	CTNND1	catenin delta 1	KIAA0384, p120, p120cas, p120ctn	GO:0099092	postsynaptic density, intracellular component (GO:0099092)	CC	2372
DLG4	HGNC:2903	DLG4	discs large MAGUK scaffold protein 4	PSD-95, PSD95, SAP90, SAP-90	GO:0098919	structural constituent of postsynaptic density (GO:0098919)	BP	2375
GRIN1	HGNC:4584	GRIN1	glutamate ionotropic receptor NMDA type subunit 1	GluN1	GO:0099061	integral component of postsynaptic density membrane (GO:0099061)	CC	2377
GRIN2A	HGNC:4585	GRIN2A	glutamate ionotropic receptor NMDA type subunit 2A	GluN2A	GO:0099061	integral component of postsynaptic density membrane (GO:0099061)	CC	2378
GRIN2B	HGNC:4586	GRIN2B	glutamate ionotropic receptor NMDA type subunit 2B	GluN2B	GO:0099061	integral component of postsynaptic density membrane (GO:0099061)	CC	2379
GRIA1	HGNC:4571	GRIA1	glutamate ionotropic receptor AMPA type subunit 1	GluA1, GLURA	GO:0099061	integral component of postsynaptic density membrane (GO:0099061)	CC	2386
GRIA1	HGNC:4571	GRIA1	glutamate ionotropic receptor AMPA type subunit 1	GluA1, GLURA	GO:1904315	transmitter-gated ion channel activity involved in regulation of postsynaptic membrane potential (GO:1904315)	BP	2387
MADD	HGNC:6766	MADD	MAP kinase activating death domain	DENN, KIAA0358, RAB3GEP	GO:0045202	synapse (GO:0045202)	CC	2388
PAK1	HGNC:8590	PAK1	p21 (RAC1) activated kinase 1		GO:0150036	regulation of trans-synaptic signaling by endocannabinoid, modulating synaptic transmission (GO:0150036)	BP	2392
GAPDH	HGNC:4141	GAPDH	glyceraldehyde-3-phosphate dehydrogenase		GO:0099162	regulation of synaptic vesicle neurotransmitter loading (GO:0099162)	BP	2398
ABR	HGNC:81	ABR	ABR, RhoGEF and GTPase activating protein	MDB	GO:0050804	modulation of chemical synaptic transmission (GO:0050804)	BP	2399
BCR	HGNC:1014	BCR	BCR, RhoGEF and GTPase activating protein	D22S662, CML, PHL, ALL	GO:0050804	modulation of chemical synaptic transmission (GO:0050804)	BP	2400
NCAM1	HGNC:7656	NCAM1	neural cell adhesion molecule 1	NCAM, CD56	GO:0099055	integral component of postsynaptic membrane (GO:0099055)	CC	2406
DAG1	HGNC:2666	DAG1	dystroglycan 1	A3a, 156DAG, AGRNR, DAG	GO:0099524	postsynaptic cytosol (GO:0099524)	CC	2411
ACTR3	HGNC:170	ACTR3	ARP3 actin related protein 3 homolog	ARP3	GO:0098974	postsynaptic actin cytoskeleton organization (GO:0098974)	BP	2417
CACNB2	HGNC:1402	CACNB2	calcium voltage-gated channel auxiliary subunit beta 2		GO:0099635	voltage-gated calcium channel activity involved in positive regulation of presynaptic cytosolic calcium levels (GO:0099635)	BP	2420
CACNB4	HGNC:1404	CACNB4	calcium voltage-gated channel auxiliary subunit beta 4	EJM4	GO:0099635	voltage-gated calcium channel activity involved in positive regulation of presynaptic cytosolic calcium levels (GO:0099635)	BP	2421
CDK5	HGNC:1774	CDK5	cyclin dependent kinase 5	PSSALRE	GO:0098794	postsynapse (GO:0098794)	CC	2422
CDK5	HGNC:1774	CDK5	cyclin dependent kinase 5	PSSALRE	GO:1905806	regulation of synapse disassembly (GO:1905806)	BP	2423
PAK1	HGNC:8590	PAK1	p21 (RAC1) activated kinase 1		GO:0098696	regulation of neurotransmitter receptor localization to postsynaptic specialization membrane (GO:0098696)	BP	2432
PAK2	HGNC:8591	PAK2	p21 (RAC1) activated kinase 2	PAK65, PAKgamma	GO:0098696	regulation of neurotransmitter receptor localization to postsynaptic specialization membrane (GO:0098696)	BP	2432
PAK3	HGNC:8592	PAK3	p21 (RAC1) activated kinase 3	hPAK3, bPAK	GO:0098696	regulation of neurotransmitter receptor localization to postsynaptic specialization membrane (GO:0098696)	BP	2432
PAK1	HGNC:8590	PAK1	p21 (RAC1) activated kinase 1		GO:0098696	regulation of neurotransmitter receptor localization to postsynaptic specialization membrane (GO:0098696)	BP	2433
PAK2	HGNC:8591	PAK2	p21 (RAC1) activated kinase 2	PAK65, PAKgamma	GO:0098696	regulation of neurotransmitter receptor localization to postsynaptic specialization membrane (GO:0098696)	BP	2433
PAK3	HGNC:8592	PAK3	p21 (RAC1) activated kinase 3	hPAK3, bPAK	GO:0098696	regulation of neurotransmitter receptor localization to postsynaptic specialization membrane (GO:0098696)	BP	2433
SFPQ	HGNC:10774	SFPQ	splicing factor proline and glutamine rich	PSF, PPP1R140	GO:0098963	dendritic transport of messenger ribonucleoprotein complex (GO:0098963)	BP	2434
STAU1	HGNC:11370	STAU1	staufen double-stranded RNA binding protein 1	PPP1R150	GO:0098963	dendritic transport of messenger ribonucleoprotein complex (GO:0098963)	BP	2435
WASL	HGNC:12735	WASL	Wiskott-Aldrich syndrome like	N-WASP, NWASP, WASPB	GO:0098794	postsynapse (GO:0098794)	CC	2437
WASL	HGNC:12735	WASL	Wiskott-Aldrich syndrome like	N-WASP, NWASP, WASPB	GO:0098974	postsynaptic actin cytoskeleton organization (GO:0098974)	BP	2438
STX12	HGNC:11430	STX12	syntaxin 12	STX13, STX14	GO:0030285	integral component of synaptic vesicle membrane (GO:0030285)	CC	2440
CACNB4	HGNC:1404	CACNB4	calcium voltage-gated channel auxiliary subunit beta 4	EJM4	GO:2000300	regulation of synaptic vesicle exocytosis (GO:2000300)	BP	2444
PLS3	HGNC:9091	PLS3	plastin 3	T-plastin	GO:0098693	regulation of synaptic vesicle cycle (GO:0098693)	BP	2447
EPHA4	HGNC:3388	EPHA4	EPH receptor A4	Hek8	GO:1905806	regulation of synapse disassembly (GO:1905806)	BP	2449
NGEF	HGNC:7807	NGEF	neuronal guanine nucleotide exchange factor	ARHGEF27	GO:1905806	regulation of synapse disassembly (GO:1905806)	BP	2450
PTPRF	HGNC:9670	PTPRF	protein tyrosine phosphatase, receptor type F		GO:0099560	synapse adhesion between pre- and post-synapse (GO:0099560)	BP	2463
PTPRS	HGNC:9681	PTPRS	protein tyrosine phosphatase, receptor type S		GO:0099560	synapse adhesion between pre- and post-synapse (GO:0099560)	BP	2464
PTPRD	HGNC:9668	PTPRD	protein tyrosine phosphatase, receptor type D	PTPD, HPTP	GO:0099560	synapse adhesion between pre- and post-synapse (GO:0099560)	BP	2465
PTPRF	HGNC:9670	PTPRF	protein tyrosine phosphatase, receptor type F		GO:0099560	synapse adhesion between pre- and post-synapse (GO:0099560)	BP	2471
PTPRS	HGNC:9681	PTPRS	protein tyrosine phosphatase, receptor type S		GO:0099560	synapse adhesion between pre- and post-synapse (GO:0099560)	BP	2472
PTPRD	HGNC:9668	PTPRD	protein tyrosine phosphatase, receptor type D	PTPD, HPTP	GO:0099560	synapse adhesion between pre- and post-synapse (GO:0099560)	BP	2473
PTPRS	HGNC:9681	PTPRS	protein tyrosine phosphatase, receptor type S		GO:0099560	synapse adhesion between pre- and post-synapse (GO:0099560)	BP	2477
PTPRD	HGNC:9668	PTPRD	protein tyrosine phosphatase, receptor type D	PTPD, HPTP	GO:0099560	synapse adhesion between pre- and post-synapse (GO:0099560)	BP	2478
GRIA2	HGNC:4572	GRIA2	glutamate ionotropic receptor AMPA type subunit 2	GluA2, GLURB	GO:1904315	transmitter-gated ion channel activity involved in regulation of postsynaptic membrane potential (GO:1904315)	BP	2479
GRIA2	HGNC:4572	GRIA2	glutamate ionotropic receptor AMPA type subunit 2	GluA2, GLURB	GO:0099061	integral component of postsynaptic density membrane (GO:0099061)	CC	2481
RAPGEF4	HGNC:16626	RAPGEF4	Rap guanine nucleotide exchange factor 4	cAMP-GEFII, CGEF2	GO:0014069	postsynaptic density (GO:0014069)	CC	2482
CTNND2	HGNC:2516	CTNND2	catenin delta 2	NPRAP, GT24	GO:0014069	postsynaptic density (GO:0014069)	CC	2485
GRIA4	HGNC:4574	GRIA4	glutamate ionotropic receptor AMPA type subunit 4	GluA4, GLURD	GO:1904315	transmitter-gated ion channel activity involved in regulation of postsynaptic membrane potential (GO:1904315)	BP	2486
GRIA4	HGNC:4574	GRIA4	glutamate ionotropic receptor AMPA type subunit 4	GluA4, GLURD	GO:0099061	integral component of postsynaptic density membrane (GO:0099061)	CC	2487
AAK1	HGNC:19679	AAK1	AP2 associated kinase 1	KIAA1048, DKFZp686K16132	GO:0098793	presynapse (GO:0098793)	CC	2504
YWHAG	HGNC:12852	YWHAG	tyrosine 3-monooxygenase/tryptophan 5-monooxygenase activation protein gamma	PPP1R170	GO:0098793	presynapse (GO:0098793)	CC	2533
EPN1	HGNC:21604	EPN1	epsin 1		GO:0098794	postsynapse (GO:0098794)	CC	2538
AP1G1	HGNC:555	AP1G1	adaptor related protein complex 1 subunit gamma 1		GO:0098793	presynapse (GO:0098793)	CC	2539
YWHAE	HGNC:12851	YWHAE	tyrosine 3-monooxygenase/tryptophan 5-monooxygenase activation protein epsilon	FLJ45465	GO:0099072	regulation of postsynaptic membrane neurotransmitter receptor levels (GO:0099072)	BP	2552
SYT11	HGNC:19239	SYT11	synaptotagmin 11	KIAA0080, MGC10881, MGC17226, DKFZp781D015	GO:0098794	postsynapse (GO:0098794)	CC	2562
SYT11	HGNC:19239	SYT11	synaptotagmin 11	KIAA0080, MGC10881, MGC17226, DKFZp781D015	GO:0030285	integral component of synaptic vesicle membrane (GO:0030285)	CC	2565
SYT11	HGNC:19239	SYT11	synaptotagmin 11	KIAA0080, MGC10881, MGC17226, DKFZp781D015	GO:0099059	integral component of presynaptic active zone membrane (GO:0099059)	CC	2566
SACM1L	HGNC:17059	SACM1L	SAC1 like phosphatidylinositide phosphatase	SAC1, KIAA0851	GO:0098969	neurotransmitter receptor transport to postsynaptic membrane (GO:0098969)	BP	2574
MPP2	HGNC:7220	MPP2	membrane palmitoylated protein 2	DKFZp761D0712	GO:0098919	structural constituent of postsynaptic density (GO:0098919)	BP	2583
MPP2	HGNC:7220	MPP2	membrane palmitoylated protein 2	DKFZp761D0712	GO:0099031	anchored component of postsynaptic density membrane (GO:0099031)	CC	2584
MPP2	HGNC:7220	MPP2	membrane palmitoylated protein 2	DKFZp761D0712	GO:0098919	structural constituent of postsynaptic density (GO:0098919)	BP	2585
DLG3	HGNC:2902	DLG3	discs large MAGUK scaffold protein 3	NE-Dlg, SAP102, SAP-102, NEDLG, KIAA1232, MRX90, PPP1R82	GO:0099072	regulation of postsynaptic membrane neurotransmitter receptor levels (GO:0099072)	BP	2594
DLG2	HGNC:2901	DLG2	discs large MAGUK scaffold protein 2	PSD-93, PSD93, chapsyn-110, PPP1R58	GO:0099645	neurotransmitter receptor localization to postsynaptic specialization membrane (GO:0099645)	BP	2595
DGKE	HGNC:2852	DGKE	diacylglycerol kinase epsilon	DAGK6, DGK	GO:0050804	modulation of chemical synaptic transmission (GO:0050804)	BP	2599
ARF6	HGNC:659	ARF6	ADP ribosylation factor 6		GO:0099562	maintenance of postsynaptic density structure (GO:0099562)	BP	2600
ITGB1	HGNC:6153	ITGB1	integrin subunit beta 1	CD29, GPIIA	GO:0050804	modulation of chemical synaptic transmission (GO:0050804)	BP	2602
VPS35	HGNC:13487	VPS35	VPS35, retromer complex component	FLJ10752, MEM3, PARK17	GO:0098793	presynapse (GO:0098793)	CC	2625
SLC2A3	HGNC:11007	SLC2A3	solute carrier family 2 member 3		GO:0099699	integral component of synaptic membrane (GO:0099699)	CC	2626
DLG1	HGNC:2900	DLG1	discs large MAGUK scaffold protein 1	SAP97, SAP-97, hdlg, DLGH1, dJ1061C18.1.1	GO:0099645	neurotransmitter receptor localization to postsynaptic specialization membrane (GO:0099645)	BP	2635
DLG4	HGNC:2903	DLG4	discs large MAGUK scaffold protein 4	PSD-95, PSD95, SAP90, SAP-90	GO:0099645	neurotransmitter receptor localization to postsynaptic specialization membrane (GO:0099645)	BP	2636
NCAM1	HGNC:7656	NCAM1	neural cell adhesion molecule 1	NCAM, CD56	GO:0050804	modulation of chemical synaptic transmission (GO:0050804)	BP	2642
NRCAM	HGNC:7994	NRCAM	neuronal cell adhesion molecule	KIAA0343, Bravo	GO:0099061	integral component of postsynaptic density membrane (GO:0099061)	CC	2643
NRCAM	HGNC:7994	NRCAM	neuronal cell adhesion molecule	KIAA0343, Bravo	GO:0099175	regulation of postsynapse organization (GO:0099175)	BP	2644
PTPRA	HGNC:9664	PTPRA	protein tyrosine phosphatase, receptor type A	LRP, HLPR, HPTPA, RPTPA	GO:0050804	modulation of chemical synaptic transmission (GO:0050804)	BP	2647
PTPRD	HGNC:9668	PTPRD	protein tyrosine phosphatase, receptor type D	PTPD, HPTP	GO:0050804	modulation of chemical synaptic transmission (GO:0050804)	BP	2648
GABRA2	HGNC:4076	GABRA2	gamma-aminobutyric acid type A receptor alpha2 subunit		GO:0099060	integral component of postsynaptic specialization membrane (GO:0099060)	CC	2649
PTPRS	HGNC:9681	PTPRS	protein tyrosine phosphatase, receptor type S		GO:0050804	modulation of chemical synaptic transmission (GO:0050804)	BP	2650
VPS35	HGNC:13487	VPS35	VPS35, retromer complex component	FLJ10752, MEM3, PARK17	GO:0098887	neurotransmitter receptor transport, endosome to postsynaptic membrane (GO:0098887)	BP	2651
VPS35	HGNC:13487	VPS35	VPS35, retromer complex component	FLJ10752, MEM3, PARK17	GO:0150052	regulation of postsynapse assembly (GO:0150052)	BP	2654
VPS35	HGNC:13487	VPS35	VPS35, retromer complex component	FLJ10752, MEM3, PARK17	GO:1900242	regulation of synaptic vesicle endocytosis (GO:1900242)	BP	2663
VPS35	HGNC:13487	VPS35	VPS35, retromer complex component	FLJ10752, MEM3, PARK17	GO:0098833	presynaptic endocytic zone (GO:0098833)	CC	2664
ARF6	HGNC:659	ARF6	ADP ribosylation factor 6		GO:0099562	maintenance of postsynaptic density structure (GO:0099562)	BP	2680
ARF6	HGNC:659	ARF6	ADP ribosylation factor 6		GO:1905606	regulation of presynapse assembly (GO:1905606)	BP	2681
ADD2	HGNC:244	ADD2	adducin 2	ADDB	GO:0007416	synapse assembly (GO:0007416)	BP	2687
ADD2	HGNC:244	ADD2	adducin 2	ADDB	GO:0098794	postsynapse (GO:0098794)	CC	2688
ADD1	HGNC:243	ADD1	adducin 1		GO:0098793	presynapse (GO:0098793)	CC	2689
ADD2	HGNC:244	ADD2	adducin 2	ADDB	GO:0098793	presynapse (GO:0098793)	CC	2689
ADD3	HGNC:245	ADD3	adducin 3		GO:0098793	presynapse (GO:0098793)	CC	2689
ADD1	HGNC:243	ADD1	adducin 1		GO:0098794	postsynapse (GO:0098794)	CC	2690
ADD2	HGNC:244	ADD2	adducin 2	ADDB	GO:0098794	postsynapse (GO:0098794)	CC	2690
ADD3	HGNC:245	ADD3	adducin 3		GO:0098794	postsynapse (GO:0098794)	CC	2690
VPS35	HGNC:13487	VPS35	VPS35, retromer complex component	FLJ10752, MEM3, PARK17	GO:0098794	postsynapse (GO:0098794)	CC	2701
VPS35	HGNC:13487	VPS35	VPS35, retromer complex component	FLJ10752, MEM3, PARK17	GO:0098794	postsynapse (GO:0098794)	CC	2710
ARF4	HGNC:655	ARF4	ADP ribosylation factor 4		GO:0099175	regulation of postsynapse organization (GO:0099175)	BP	2711
MAPK10	HGNC:6872	MAPK10	mitogen-activated protein kinase 10	JNK3, p493F12, p54bSAPK	GO:0098969	neurotransmitter receptor transport to postsynaptic membrane (GO:0098969)	BP	2719
DLG1	HGNC:2900	DLG1	discs large MAGUK scaffold protein 1	SAP97, SAP-97, hdlg, DLGH1, dJ1061C18.1.1	GO:0098919	structural constituent of postsynaptic density (GO:0098919)	BP	2725
DLG3	HGNC:2902	DLG3	discs large MAGUK scaffold protein 3	NE-Dlg, SAP102, SAP-102, NEDLG, KIAA1232, MRX90, PPP1R82	GO:0098919	structural constituent of postsynaptic density (GO:0098919)	BP	2726
DLG2	HGNC:2901	DLG2	discs large MAGUK scaffold protein 2	PSD-93, PSD93, chapsyn-110, PPP1R58	GO:0098919	structural constituent of postsynaptic density (GO:0098919)	BP	2728
PPFIA3	HGNC:9247	PPFIA3	PTPRF interacting protein alpha 3	KIAA0654, LPNA3, MGC126567, MGC126569	GO:0098831	presynaptic active zone cytoplasmic component (GO:0098831)	CC	2734
ERC2	HGNC:31922	ERC2	ELKS/RAB6-interacting/CAST family member 2	CAST, CAST1, KIAA0378, SPBC110, Spc110, ELKSL	GO:0098831	presynaptic active zone cytoplasmic component (GO:0098831)	CC	2736
PPFIA3	HGNC:9247	PPFIA3	PTPRF interacting protein alpha 3	KIAA0654, LPNA3, MGC126567, MGC126569	GO:0016079	synaptic vesicle exocytosis (GO:0016079)	BP	2737
PPFIA3	HGNC:9247	PPFIA3	PTPRF interacting protein alpha 3	KIAA0654, LPNA3, MGC126567, MGC126569	GO:0016081	synaptic vesicle docking (GO:0016081)	BP	2738
AP3D1	HGNC:568	AP3D1	adaptor related protein complex 3 subunit delta 1	ADTD	GO:0098793	presynapse (GO:0098793)	CC	2740
DLG1	HGNC:2900	DLG1	discs large MAGUK scaffold protein 1	SAP97, SAP-97, hdlg, DLGH1, dJ1061C18.1.1	GO:0099645	neurotransmitter receptor localization to postsynaptic specialization membrane (GO:0099645)	BP	2741
AP3D1	HGNC:568	AP3D1	adaptor related protein complex 3 subunit delta 1	ADTD	GO:0098794	postsynapse (GO:0098794)	CC	2742
PTPRS	HGNC:9681	PTPRS	protein tyrosine phosphatase, receptor type S		GO:0050808	synapse organization (GO:0050808)	BP	2743
NRXN1	HGNC:8008	NRXN1	neurexin 1	KIAA0578, Hs.22998	GO:0099054	presynapse assembly (GO:0099054)	BP	2748
CLSTN1	HGNC:17447	CLSTN1	calsyntenin 1	CSTN1, KIAA0911, CDHR12	GO:0098845	postsynaptic endosome (GO:0098845)	CC	2760
GABBR1	HGNC:4070	GABBR1	gamma-aminobutyric acid type B receptor subunit 1	hGB1a, GPRC3A	GO:0099056	integral component of presynaptic membrane (GO:0099056)	CC	2771
CNKSR2	HGNC:19701	CNKSR2	connector enhancer of kinase suppressor of Ras 2	KIAA0902, CNK2, KSR2	GO:0099173	postsynapse organization (GO:0099173)	BP	2788
ARHGEF7	HGNC:15607	ARHGEF7	Rho guanine nucleotide exchange factor 7	KIAA0142, PIXB, DKFZp761K1021, Nbla10314, DKFZp686C12170, BETA-PIX, COOL1, P85SPR, P85, P85COOL1, P50BP, PAK3, P50	GO:0099140	presynaptic actin cytoskeleton organization (GO:0099140)	BP	2789
ARHGEF7	HGNC:15607	ARHGEF7	Rho guanine nucleotide exchange factor 7	KIAA0142, PIXB, DKFZp761K1021, Nbla10314, DKFZp686C12170, BETA-PIX, COOL1, P85SPR, P85, P85COOL1, P50BP, PAK3, P50	GO:0098974	postsynaptic actin cytoskeleton organization (GO:0098974)	BP	2790
DVL3	HGNC:3087	DVL3	dishevelled segment polarity protein 3	KIAA0208	GO:0045202	synapse (GO:0045202)	CC	2797
CLSTN1	HGNC:17447	CLSTN1	calsyntenin 1	CSTN1, KIAA0911, CDHR12	GO:0099061	integral component of postsynaptic density membrane (GO:0099061)	CC	2826
CLSTN1	HGNC:17447	CLSTN1	calsyntenin 1	CSTN1, KIAA0911, CDHR12	GO:0099065	integral component of spine apparatus membrane (GO:0099065)	CC	2827
CLSTN1	HGNC:17447	CLSTN1	calsyntenin 1	CSTN1, KIAA0911, CDHR12	GO:0098969	neurotransmitter receptor transport to postsynaptic membrane (GO:0098969)	BP	2828
CLSTN1	HGNC:17447	CLSTN1	calsyntenin 1	CSTN1, KIAA0911, CDHR12	GO:0090128	regulation of synapse maturation (GO:0090128)	BP	2829
GNB5	HGNC:4401	GNB5	G protein subunit beta 5	GB5	GO:0098793	presynapse (GO:0098793)	CC	2833
YWHAZ	HGNC:12855	YWHAZ	tyrosine 3-monooxygenase/tryptophan 5-monooxygenase activation protein zeta	KCIP-1, 14-3-3-zeta	GO:0099572	postsynaptic specialization (GO:0099572)	CC	2839
TRIO	HGNC:12303	TRIO	trio Rho guanine nucleotide exchange factor	ARHGEF23	GO:0099170	postsynaptic modulation of chemical synaptic transmission (GO:0099170)	BP	2844
PACSIN1	HGNC:8570	PACSIN1	protein kinase C and casein kinase substrate in neurons 1	SDPI	GO:0098839	postsynaptic density membrane (GO:0098839)	CC	2848
TRIO	HGNC:12303	TRIO	trio Rho guanine nucleotide exchange factor	ARHGEF23	GO:0098794	postsynapse (GO:0098794)	CC	2849
RAPGEF4	HGNC:16626	RAPGEF4	Rap guanine nucleotide exchange factor 4	cAMP-GEFII, CGEF2	GO:0098696	regulation of neurotransmitter receptor localization to postsynaptic specialization membrane (GO:0098696)	BP	2850
RAPGEF4	HGNC:16626	RAPGEF4	Rap guanine nucleotide exchange factor 4	cAMP-GEFII, CGEF2	GO:0099175	regulation of postsynapse organization (GO:0099175)	BP	2851
RAPGEF4	HGNC:16626	RAPGEF4	Rap guanine nucleotide exchange factor 4	cAMP-GEFII, CGEF2	GO:0098693	regulation of synaptic vesicle cycle (GO:0098693)	BP	2852
NDRG1	HGNC:7679	NDRG1	N-myc downstream regulated 1	DRG1, RTP, TDD5, NDR1	GO:0099173	postsynapse organization (GO:0099173)	BP	2856
RAB5A	HGNC:9783	RAB5A	RAB5A, member RAS oncogene family		GO:0098844	postsynaptic endocytic zone membrane (GO:0098844)	CC	2861
ACTN1	HGNC:163	ACTN1	actinin alpha 1		GO:0099186	structural constituent of postsynapse (GO:0099186)	BP	2870
CABP1	HGNC:1384	CABP1	calcium binding protein 1		GO:0098885	modification of postsynaptic actin cytoskeleton (GO:0098885)	BP	2871
DNM3	HGNC:29125	DNM3	dynamin 3	KIAA0820	GO:0098844	postsynaptic endocytic zone membrane (GO:0098844)	CC	2877
DNM1	HGNC:2972	DNM1	dynamin 1		GO:0050804	modulation of chemical synaptic transmission (GO:0050804)	BP	2879
DNM2	HGNC:2974	DNM2	dynamin 2	DYNII, DYN2, CMTDIB, CMTDI1, DI-CMTB, CMT2M	GO:0099092	postsynaptic density, intracellular component (GO:0099092)	CC	2880
EPS15	HGNC:3419	EPS15	epidermal growth factor receptor pathway substrate 15	AF-1P, MLLT5	GO:0045202	synapse (GO:0045202)	CC	2882
EPS15	HGNC:3419	EPS15	epidermal growth factor receptor pathway substrate 15	AF-1P, MLLT5	GO:0098884	postsynaptic neurotransmitter receptor endocytosis (GO:0098884)	BP	2883
HSPA8	HGNC:5241	HSPA8	heat shock protein family A (Hsp70) member 8	HSC71, HSC70, HSP73	GO:0014069	postsynaptic density (GO:0014069)	CC	2884
HSPA8	HGNC:5241	HSPA8	heat shock protein family A (Hsp70) member 8	HSC71, HSC70, HSP73	GO:0098794	postsynapse (GO:0098794)	CC	2886
HSPA8	HGNC:5241	HSPA8	heat shock protein family A (Hsp70) member 8	HSC71, HSC70, HSP73	GO:0098793	presynapse (GO:0098793)	CC	2887
MYH10	HGNC:7568	MYH10	myosin heavy chain 10	NMMHCB	GO:0098871	postsynaptic actin cytoskeleton (GO:0098871)	CC	2891
MYH10	HGNC:7568	MYH10	myosin heavy chain 10	NMMHCB	GO:0098974	postsynaptic actin cytoskeleton organization (GO:0098974)	BP	2892
SGIP1	HGNC:25412	SGIP1	SH3 domain GRB2 like endophilin interacting protein 1	DKFZp761D221	GO:0098793	presynapse (GO:0098793)	CC	2893
SH3GL2	HGNC:10831	SH3GL2	SH3 domain containing GRB2 like 2, endophilin A1	SH3P4, SH3D2A, CNSA2, EEN-B1	GO:0030672	synaptic vesicle membrane (GO:0030672)	CC	2898
PIP5K1C	HGNC:8996	PIP5K1C	phosphatidylinositol-4-phosphate 5-kinase type 1 gamma	PIP5Kgamma, KIAA0589, LCCS3	GO:0014069	postsynaptic density (GO:0014069)	CC	2904
PIP5K1C	HGNC:8996	PIP5K1C	phosphatidylinositol-4-phosphate 5-kinase type 1 gamma	PIP5Kgamma, KIAA0589, LCCS3	GO:0099149	regulation of postsynaptic neurotransmitter receptor endocytosis (GO:0099149)	BP	2905
SYNE1	HGNC:17089	SYNE1	spectrin repeat containing nuclear envelope protein 1	SYNE-1B, KIAA0796, 8B, Nesprin-1, enaptin, MYNE1, CPG2, dJ45H2.2, SCAR8, ARCA1, Nesp1	GO:0098871	postsynaptic actin cytoskeleton (GO:0098871)	CC	2906
PACSIN1	HGNC:8570	PACSIN1	protein kinase C and casein kinase substrate in neurons 1	SDPI	GO:0099149	regulation of postsynaptic neurotransmitter receptor endocytosis (GO:0099149)	BP	2907
SYNJ1	HGNC:11503	SYNJ1	synaptojanin 1	INPP5G, PARK20	GO:0099149	regulation of postsynaptic neurotransmitter receptor endocytosis (GO:0099149)	BP	2910
HSPA8	HGNC:5241	HSPA8	heat shock protein family A (Hsp70) member 8	HSC71, HSC70, HSP73	GO:0099634	postsynaptic specialization membrane (GO:0099634)	CC	2911
LIN7C	HGNC:17789	LIN7C	lin-7 homolog C, crumbs cell polarity complex component	MALS-3, Lin7c, LIN-7C, LIN-7-C, VELI3, FLJ11215	GO:0045202	synapse (GO:0045202)	CC	2913
TRIO	HGNC:12303	TRIO	trio Rho guanine nucleotide exchange factor	ARHGEF23	GO:0048786	presynaptic active zone (GO:0048786)	CC	2922
NDRG2	HGNC:14460	NDRG2	NDRG family member 2	KIAA1248, SYLD	GO:0099173	postsynapse organization (GO:0099173)	BP	2926
CLPTM1	HGNC:2087	CLPTM1	CLPTM1, transmembrane protein		GO:0099072	regulation of postsynaptic membrane neurotransmitter receptor levels (GO:0099072)	BP	2932
CTNNB1	HGNC:2514	CTNNB1	catenin beta 1	beta-catenin, armadillo	GO:0051963	regulation of synapse assembly (GO:0051963)	BP	2936
DIAPH1	HGNC:2876	DIAPH1	diaphanous related formin 1	hDIA1, LFHL1	GO:0048488	synaptic vesicle endocytosis (GO:0048488)	BP	2938
RPS6	HGNC:10429	RPS6	ribosomal protein S6	S6	SYNGO:presyn_ribosome	presynaptic ribosome	CC	2940
SRCIN1	HGNC:29506	SRCIN1	SRC kinase signaling inhibitor 1	SNIP, p140Cap, KIAA1684	GO:0051963	regulation of synapse assembly (GO:0051963)	BP	2958
SH3GL2	HGNC:10831	SH3GL2	SH3 domain containing GRB2 like 2, endophilin A1	SH3P4, SH3D2A, CNSA2, EEN-B1	GO:0098794	postsynapse (GO:0098794)	CC	2959
SH3GL2	HGNC:10831	SH3GL2	SH3 domain containing GRB2 like 2, endophilin A1	SH3P4, SH3D2A, CNSA2, EEN-B1	GO:0098974	postsynaptic actin cytoskeleton organization (GO:0098974)	BP	2960
SRCIN1	HGNC:29506	SRCIN1	SRC kinase signaling inhibitor 1	SNIP, p140Cap, KIAA1684	GO:0098974	postsynaptic actin cytoskeleton organization (GO:0098974)	BP	2961
NPTX2	HGNC:7953	NPTX2	neuronal pentraxin 2		GO:0043083	synaptic cleft (GO:0043083)	CC	2963
CTNND2	HGNC:2516	CTNND2	catenin delta 2	NPRAP, GT24	GO:0098919	structural constituent of postsynaptic density (GO:0098919)	BP	2967
CTNND2	HGNC:2516	CTNND2	catenin delta 2	NPRAP, GT24	GO:0099072	regulation of postsynaptic membrane neurotransmitter receptor levels (GO:0099072)	BP	2968
EEF2	HGNC:3214	EEF2	eukaryotic translation elongation factor 2	EEF-2	SYNGO:translation_postsynapse	protein translation at postsynapse	BP	2993
DBNL	HGNC:2696	DBNL	drebrin like	SH3P7, HIP-55, ABP1	GO:0098794	postsynapse (GO:0098794)	CC	3004
DBNL	HGNC:2696	DBNL	drebrin like	SH3P7, HIP-55, ABP1	GO:0098793	presynapse (GO:0098793)	CC	3005
DBNL	HGNC:2696	DBNL	drebrin like	SH3P7, HIP-55, ABP1	GO:0098973	structural constituent of postsynaptic actin cytoskeleton (GO:0098973)	BP	3006
DBNL	HGNC:2696	DBNL	drebrin like	SH3P7, HIP-55, ABP1	GO:0098974	postsynaptic actin cytoskeleton organization (GO:0098974)	BP	3007
GABRB2	HGNC:4082	GABRB2	gamma-aminobutyric acid type A receptor beta2 subunit		GO:0099060	integral component of postsynaptic specialization membrane (GO:0099060)	CC	3008
CALD1	HGNC:1441	CALD1	caldesmon 1	CDM, H-CAD, L-CAD	GO:0098794	postsynapse (GO:0098794)	CC	3009
CNN3	HGNC:2157	CNN3	calponin 3		GO:0098794	postsynapse (GO:0098794)	CC	3010
COMT	HGNC:2228	COMT	catechol-O-methyltransferase		GO:0042135	neurotransmitter catabolic process (GO:0042135)	BP	3011
COMT	HGNC:2228	COMT	catechol-O-methyltransferase		GO:0098794	postsynapse (GO:0098794)	CC	3012
HIP1R	HGNC:18415	HIP1R	huntingtin interacting protein 1 related	KIAA0655, HIP3, HIP12, FLJ14000, ILWEQ	GO:0098794	postsynapse (GO:0098794)	CC	3033
HIP1R	HGNC:18415	HIP1R	huntingtin interacting protein 1 related	KIAA0655, HIP3, HIP12, FLJ14000, ILWEQ	GO:0099173	postsynapse organization (GO:0099173)	BP	3034
ITPKA	HGNC:6178	ITPKA	inositol-trisphosphate 3-kinase A	IP3KA, IP3-3KA	GO:0098885	modification of postsynaptic actin cytoskeleton (GO:0098885)	BP	3035
ITPKA	HGNC:6178	ITPKA	inositol-trisphosphate 3-kinase A	IP3KA, IP3-3KA	GO:0098871	postsynaptic actin cytoskeleton (GO:0098871)	CC	3036
KCNAB2	HGNC:6229	KCNAB2	potassium voltage-gated channel subfamily A regulatory beta subunit 2	AKR6A5, KCNA2B, HKvbeta2.1, HKvbeta2.2	GO:0099061	integral component of postsynaptic density membrane (GO:0099061)	CC	3037
CUL3	HGNC:2553	CUL3	cullin 3		SYNGO:catabolic_postsynapse_regulation	regulation of protein catabolic process at postsynapse	BP	3040
GABRB2	HGNC:4082	GABRB2	gamma-aminobutyric acid type A receptor beta2 subunit		GO:0099059	integral component of presynaptic active zone membrane (GO:0099059)	CC	3041
GRK2	HGNC:289	GRK2	G protein-coupled receptor kinase 2	BARK1	GO:0014069	postsynaptic density (GO:0014069)	CC	3064
GRK2	HGNC:289	GRK2	G protein-coupled receptor kinase 2	BARK1	GO:0098793	presynapse (GO:0098793)	CC	3065
MARK2	HGNC:3332	MARK2	microtubule affinity regulating kinase 2	PAR-1, Par1b, PAR-1B	GO:0098794	postsynapse (GO:0098794)	CC	3078
MARK2	HGNC:3332	MARK2	microtubule affinity regulating kinase 2	PAR-1, Par1b, PAR-1B	GO:0099175	regulation of postsynapse organization (GO:0099175)	BP	3079
NF1	HGNC:7765	NF1	neurofibromin 1		GO:0099175	regulation of postsynapse organization (GO:0099175)	BP	3081
SPTAN1	HGNC:11273	SPTAN1	spectrin alpha, non-erythrocytic 1		GO:0098794	postsynapse (GO:0098794)	CC	3084
RBMX	HGNC:9910	RBMX	RNA binding motif protein X-linked	RNMX, hnRNP-G, HNRNPG	GO:0014069	postsynaptic density (GO:0014069)	CC	3094
HNRNPD	HGNC:5036	HNRNPD	heterogeneous nuclear ribonucleoprotein D		GO:0014069	postsynaptic density (GO:0014069)	CC	3102
HNRNPM	HGNC:5046	HNRNPM	heterogeneous nuclear ribonucleoprotein M	HTGR1, HNRNPM4, HNRPM4, CEAR	GO:0014069	postsynaptic density (GO:0014069)	CC	3103
HNRNPA2B1	HGNC:5033	HNRNPA2B1	heterogeneous nuclear ribonucleoprotein A2/B1		GO:0014069	postsynaptic density (GO:0014069)	CC	3104
RBMX	HGNC:9910	RBMX	RNA binding motif protein X-linked	RNMX, hnRNP-G, HNRNPG	GO:0099175	regulation of postsynapse organization (GO:0099175)	BP	3105
HNRNPM	HGNC:5046	HNRNPM	heterogeneous nuclear ribonucleoprotein M	HTGR1, HNRNPM4, HNRPM4, CEAR	GO:0099175	regulation of postsynapse organization (GO:0099175)	BP	3108
CNKSR2	HGNC:19701	CNKSR2	connector enhancer of kinase suppressor of Ras 2	KIAA0902, CNK2, KSR2	GO:0099147	extrinsic component of postsynaptic density membrane (GO:0099147)	CC	3118
PLXNA4	HGNC:9102	PLXNA4	plexin A4	KIAA1550, DKFZp434G0625PRO34003, FAYV2820	GO:0099558	maintenance of synapse structure (GO:0099558)	BP	3128
ITGB1	HGNC:6153	ITGB1	integrin subunit beta 1	CD29, GPIIA	GO:1905806	regulation of synapse disassembly (GO:1905806)	BP	3129
SORT1	HGNC:11186	SORT1	sortilin 1	Gp95, NT3	GO:0099558	maintenance of synapse structure (GO:0099558)	BP	3130
SNAP29	HGNC:11133	SNAP29	synaptosome associated protein 29	SNAP-29, CEDNIK	GO:0008021	synaptic vesicle (GO:0008021)	CC	3645
SKP1	HGNC:10899	SKP1	S-phase kinase associated protein 1	EMC19, OCP2, TCEB1L, MGC34403, OCP-II, p19A	GO:1905806	regulation of synapse disassembly (GO:1905806)	BP	3646
MAPK3	HGNC:6877	MAPK3	mitogen-activated protein kinase 3	ERK1, p44mapk, p44erk1	GO:0050804	modulation of chemical synaptic transmission (GO:0050804)	BP	3649
SV2B	HGNC:16874	SV2B	synaptic vesicle glycoprotein 2B	KIAA0735, HsT19680	GO:0099509	regulation of presynaptic cytosolic calcium levels (GO:0099509)	BP	3651
NRXN3	HGNC:8010	NRXN3	neurexin 3	KIAA0743	GO:0099072	regulation of postsynaptic membrane neurotransmitter receptor levels (GO:0099072)	BP	3668
CAMK4	HGNC:1464	CAMK4	calcium/calmodulin dependent protein kinase IV	CaMK-GR	GO:0099170	postsynaptic modulation of chemical synaptic transmission (GO:0099170)	BP	3669
MYO5A	HGNC:7602	MYO5A	myosin VA	MYO5, GS1, MYR12	GO:0098794	postsynapse (GO:0098794)	CC	3671
NRXN3	HGNC:8010	NRXN3	neurexin 3	KIAA0743	GO:0099537	trans-synaptic signaling (GO:0099537)	BP	3674
NRXN3	HGNC:8010	NRXN3	neurexin 3	KIAA0743	GO:0099537	trans-synaptic signaling (GO:0099537)	BP	3675
CDKL5	HGNC:11411	CDKL5	cyclin dependent kinase like 5	EIEE2, CFAP247	GO:0050804	modulation of chemical synaptic transmission (GO:0050804)	BP	3677
NEDD4	HGNC:7727	NEDD4	neural precursor cell expressed, developmentally down-regulated 4, E3 ubiquitin protein ligase	KIAA0093, MGC176705, NEDD4-1, RPF1	SYNGO:catabolic_postsynapse_regulation	regulation of protein catabolic process at postsynapse	BP	3679
SYNGAP1	HGNC:11497	SYNGAP1	synaptic Ras GTPase activating protein 1	SYNGAP, RASA5, KIAA1938	GO:0050804	modulation of chemical synaptic transmission (GO:0050804)	BP	3681
NEFL	HGNC:7739	NEFL	neurofilament light	NFL, CMT1F, CMT2E, NF68, PPP1R110	GO:0099170	postsynaptic modulation of chemical synaptic transmission (GO:0099170)	BP	3684
BAIAP2	HGNC:947	BAIAP2	BAI1 associated protein 2	BAP2, IRSp53	GO:0099175	regulation of postsynapse organization (GO:0099175)	BP	3687
SPTBN2	HGNC:11276	SPTBN2	spectrin beta, non-erythrocytic 2		GO:0099150	regulation of postsynaptic specialization assembly (GO:0099150)	BP	3689
CAMKV	HGNC:28788	CAMKV	CaM kinase like vesicle associated	MGC8407, VACAMKL	GO:0050804	modulation of chemical synaptic transmission (GO:0050804)	BP	3692
DLGAP2	HGNC:2906	DLGAP2	DLG associated protein 2	DAP-2	GO:0050804	modulation of chemical synaptic transmission (GO:0050804)	BP	3695
PFN1	HGNC:8881	PFN1	profilin 1		GO:0050804	modulation of chemical synaptic transmission (GO:0050804)	BP	3696
PFN2	HGNC:8882	PFN2	profilin 2		GO:0050804	modulation of chemical synaptic transmission (GO:0050804)	BP	3697
CHMP2B	HGNC:24537	CHMP2B	charged multivesicular body protein 2B	DKFZP564O123, CHMP2.5, VPS2B	GO:0050804	modulation of chemical synaptic transmission (GO:0050804)	BP	3701
ACTR3	HGNC:170	ACTR3	ARP3 actin related protein 3 homolog	ARP3	GO:0099173	postsynapse organization (GO:0099173)	BP	3714
WASL	HGNC:12735	WASL	Wiskott-Aldrich syndrome like	N-WASP, NWASP, WASPB	GO:0099173	postsynapse organization (GO:0099173)	BP	3715
ERC1	HGNC:17072	ERC1	ELKS/RAB6-interacting/CAST family member 1	ELKS, KIAA1081, CAST2, MGC12974	GO:0150037	regulation of calcium-dependent activation of synaptic vesicle fusion (GO:0150037)	BP	3719
ERC2	HGNC:31922	ERC2	ELKS/RAB6-interacting/CAST family member 2	CAST, CAST1, KIAA0378, SPBC110, Spc110, ELKSL	GO:0099509	regulation of presynaptic cytosolic calcium levels (GO:0099509)	BP	3721
ERC2	HGNC:31922	ERC2	ELKS/RAB6-interacting/CAST family member 2	CAST, CAST1, KIAA0378, SPBC110, Spc110, ELKSL	GO:0150037	regulation of calcium-dependent activation of synaptic vesicle fusion (GO:0150037)	BP	3722
CAMK2B	HGNC:1461	CAMK2B	calcium/calmodulin dependent protein kinase II beta	CAM2, CAMK2	GO:0090128	regulation of synapse maturation (GO:0090128)	BP	3724
IQSEC1	HGNC:29112	IQSEC1	IQ motif and Sec7 domain 1	KIAA0763, GEP100, BRAG2, ARF-GEP100	GO:0099170	postsynaptic modulation of chemical synaptic transmission (GO:0099170)	BP	3725
SYNPO	HGNC:30672	SYNPO	synaptopodin	KIAA1029	GO:0099170	postsynaptic modulation of chemical synaptic transmission (GO:0099170)	BP	3726
UBE3A	HGNC:12496	UBE3A	ubiquitin protein ligase E3A	AS, ANCR, E6-AP, FLJ26981	GO:0050804	modulation of chemical synaptic transmission (GO:0050804)	BP	3729
CRK	HGNC:2362	CRK	CRK proto-oncogene, adaptor protein		GO:0098698	postsynaptic specialization assembly (GO:0098698)	BP	3731
VPS35	HGNC:13487	VPS35	VPS35, retromer complex component	FLJ10752, MEM3, PARK17	GO:0090128	regulation of synapse maturation (GO:0090128)	BP	3735
ERC2	HGNC:31922	ERC2	ELKS/RAB6-interacting/CAST family member 2	CAST, CAST1, KIAA0378, SPBC110, Spc110, ELKSL	GO:0016082	synaptic vesicle priming (GO:0016082)	BP	3740
BSN	HGNC:1117	BSN	bassoon presynaptic cytomatrix protein		GO:0097091	synaptic vesicle clustering (GO:0097091)	BP	3741
BIN1	HGNC:1052	BIN1	bridging integrator 1	SH3P9, AMPH2	GO:0048488	synaptic vesicle endocytosis (GO:0048488)	BP	3742
PUM1	HGNC:14957	PUM1	pumilio RNA binding family member 1	PUMH1, KIAA0099	GO:0098794	postsynapse (GO:0098794)	CC	3744
BIN1	HGNC:1052	BIN1	bridging integrator 1	SH3P9, AMPH2	GO:0048488	synaptic vesicle endocytosis (GO:0048488)	BP	3746
WNK1	HGNC:14540	WNK1	WNK lysine deficient protein kinase 1	HSAN2, PPP1R167	GO:0050804	modulation of chemical synaptic transmission (GO:0050804)	BP	3747
STX1A	HGNC:11433	STX1A	syntaxin 1A	HPC-1, p35-1	GO:0099059	integral component of presynaptic active zone membrane (GO:0099059)	CC	3749
STX1A	HGNC:11433	STX1A	syntaxin 1A	HPC-1, p35-1	GO:0099061	integral component of postsynaptic density membrane (GO:0099061)	CC	3750
NBEA	HGNC:7648	NBEA	neurobeachin	KIAA1544, BCL8B, FLJ10197, LYST2	GO:0098696	regulation of neurotransmitter receptor localization to postsynaptic specialization membrane (GO:0098696)	BP	3780
NBEA	HGNC:7648	NBEA	neurobeachin	KIAA1544, BCL8B, FLJ10197, LYST2	GO:0050808	synapse organization (GO:0050808)	BP	3781
SYT11	HGNC:19239	SYT11	synaptotagmin 11	KIAA0080, MGC10881, MGC17226, DKFZp781D015	GO:1900242	regulation of synaptic vesicle endocytosis (GO:1900242)	BP	3785
ANXA5	HGNC:543	ANXA5	annexin A5		GO:0030672	synaptic vesicle membrane (GO:0030672)	CC	3786
DMD	HGNC:2928	DMD	dystrophin	BMD, DXS142, DXS164, DXS206, DXS230, DXS239, DXS268, DXS269, DXS270, DXS272	GO:0099572	postsynaptic specialization (GO:0099572)	CC	3788
STX1A	HGNC:11433	STX1A	syntaxin 1A	HPC-1, p35-1	GO:0030285	integral component of synaptic vesicle membrane (GO:0030285)	CC	3789
SV2B	HGNC:16874	SV2B	synaptic vesicle glycoprotein 2B	KIAA0735, HsT19680	GO:2000300	regulation of synaptic vesicle exocytosis (GO:2000300)	BP	3795
SNAP29	HGNC:11133	SNAP29	synaptosome associated protein 29	SNAP-29, CEDNIK	GO:2000300	regulation of synaptic vesicle exocytosis (GO:2000300)	BP	3796
NAPB	HGNC:15751	NAPB	NSF attachment protein beta	SNAP-BETA, SNAPB	GO:0048787	presynaptic active zone membrane (GO:0048787)	CC	3797
CPEB2	HGNC:21745	CPEB2	cytoplasmic polyadenylation element binding protein 2		GO:0099547	regulation of translation at synapse, modulating synaptic transmission (GO:0099547)	BP	3798
SEMA4B	HGNC:10730	SEMA4B	semaphorin 4B	SemC, KIAA1745, MGC131831	GO:0099061	integral component of postsynaptic density membrane (GO:0099061)	CC	3807
PAFAH1B1	HGNC:8574	PAFAH1B1	platelet activating factor acetylhydrolase 1b regulatory subunit 1	LIS1, PAFAH, NudF	GO:0050804	modulation of chemical synaptic transmission (GO:0050804)	BP	3808
PAFAH1B1	HGNC:8574	PAFAH1B1	platelet activating factor acetylhydrolase 1b regulatory subunit 1	LIS1, PAFAH, NudF	GO:0099175	regulation of postsynapse organization (GO:0099175)	BP	3809
NBEA	HGNC:7648	NBEA	neurobeachin	KIAA1544, BCL8B, FLJ10197, LYST2	GO:0050808	synapse organization (GO:0050808)	BP	3833
ARHGEF2	HGNC:682	ARHGEF2	Rho/Rac guanine nucleotide exchange factor 2	LFP40, GEF-H1, KIAA0651, P40	GO:0098794	postsynapse (GO:0098794)	CC	3837
HIP1	HGNC:4913	HIP1	huntingtin interacting protein 1	ILWEQ	GO:0099171	presynaptic modulation of chemical synaptic transmission (GO:0099171)	BP	3838
HIP1	HGNC:4913	HIP1	huntingtin interacting protein 1	ILWEQ	GO:0099149	regulation of postsynaptic neurotransmitter receptor endocytosis (GO:0099149)	BP	3839
PTK2	HGNC:9611	PTK2	protein tyrosine kinase 2	FAK, FADK, FAK1, PPP1R71	GO:0098794	postsynapse (GO:0098794)	CC	3847
CHD4	HGNC:1919	CHD4	chromodomain helicase DNA binding protein 4	Mi-2b, Mi2-BETA	GO:0051963	regulation of synapse assembly (GO:0051963)	BP	3849
PTK2	HGNC:9611	PTK2	protein tyrosine kinase 2	FAK, FADK, FAK1, PPP1R71	GO:1905274	regulation of modification of postsynaptic actin cytoskeleton (GO:1905274)	BP	3850
PTK2B	HGNC:9612	PTK2B	protein tyrosine kinase 2 beta	CAKB, PYK2, RAFTK, PTK, CADTK	GO:0099092	postsynaptic density, intracellular component (GO:0099092)	CC	3851
PTK2B	HGNC:9612	PTK2B	protein tyrosine kinase 2 beta	CAKB, PYK2, RAFTK, PTK, CADTK	GO:0099092	postsynaptic density, intracellular component (GO:0099092)	CC	3853
PTK2B	HGNC:9612	PTK2B	protein tyrosine kinase 2 beta	CAKB, PYK2, RAFTK, PTK, CADTK	GO:0099170	postsynaptic modulation of chemical synaptic transmission (GO:0099170)	BP	3854
PTK2B	HGNC:9612	PTK2B	protein tyrosine kinase 2 beta	CAKB, PYK2, RAFTK, PTK, CADTK	GO:0098793	presynapse (GO:0098793)	CC	3855
PTK2B	HGNC:9612	PTK2B	protein tyrosine kinase 2 beta	CAKB, PYK2, RAFTK, PTK, CADTK	GO:0099151	regulation of postsynaptic density assembly (GO:0099151)	BP	3856
